# Supplementary material
Source: PubMed Central journal article supplement (PMC8864540)
Supplement: NIHMS1774267-supplement-supplement.pdf [file NIHMS1774267-supplement-supplement.pdf]

## Supplementary Appendix

This appendix has been provided by the authors to give readers additional information about their work.

Supplement to: Awad MM, Liu S, Rybkin II, et al. Acquired resistance to KRAS<sup>G12C</sup> inhibition in cancer. *N Engl J Med* 2021;384:2382-93. DOI: 10.1056/NEJMoa2105281

## Supplementary Appendix

### **Acquired resistance to KRAS G12C inhibition in cancer**

Mark M. Awad, Shengwu Liu, Igor I. Rybkin, Kathryn C. Arbour, Julien Dilly, Viola W. Zhu, Melissa L. Johnson, Rebecca S. Heist, Tejas Patil, Gregory J. Riely, Joseph O. Jacobson, Xiaoping Yang, Nicole S. Persky, David E. Root, Kristen E. Lowder, Hanrong Feng, Shannon S. Zhang, Kevin M. Haigis, Yin P. Hung, Lynette M. Sholl, Brian M. Wolpin, Julie Wiese, Jason Christiansen, Jessica Lee, Alexa B. Schrock, Lee P. Lim, Kavita Garg, Mark Li, Lars D. Engstrom, Laura Waters, J. David Lawson, Peter Olson, Piro Lito, Sai-Hong Ignatius Ou, James G. Christensen, Pasi A. Jänne, Andrew J. Aguirre.

## Supplementary Appendix Table of Contents

|                                                                                                                                                          |          |
|----------------------------------------------------------------------------------------------------------------------------------------------------------|----------|
| <b>1) Supplementary Methods</b>                                                                                                                          | Page 3   |
| <b>2) Supplementary figures</b>                                                                                                                          |          |
| <b>Figure S1.</b> Y96C alignments in IGV for Case 1.                                                                                                     | Page 7   |
| <b>Figure S2.</b> Cis/trans status for selected KRAS mutations at codons 12 and 13.                                                                      | Page 8   |
| <b>Figure S3.</b> Schematic of selected gene fusions identified in case 6.                                                                               | Page 9   |
| <b>Figure S4.</b> KRAS <sup>G12C</sup> amplification at adagrasib resistance for case 7.                                                                 | Page 10  |
| <b>Figure S5.</b> Acquired MET amplification in case 10.                                                                                                 | Page 11  |
| <b>Figure S6.</b> Lung squamous cell transformation observed in case 12.                                                                                 | Page 12  |
| <b>Figure S7.</b> Structural basis of adagrasib resistance of KRAS R68S mutation.                                                                        | Page 13  |
| <b>Figure S8.</b> Structural basis of adagrasib resistance for the KRAS H95D mutation.                                                                   | Page 14  |
| <b>Figure S9.</b> Structural basis of adagrasib resistance of KRAS Y96C mutation.                                                                        | Page 15  |
| <b>Figure S10.</b> KRAS <sup>G12C</sup> mediates IL3-independent survival of Ba/F3 cells.                                                                | Page 16  |
| <b>Figure S11.</b> Immunoblot results for G12C/R68S and G12C/H95Q treated with KRAS <sup>G12C</sup> inhibitors.                                          | Page 17  |
| <b>Figure S12.</b> Optimization of KRAS <sup>G12C</sup> inhibitor doses for the mutagenesis screen in Ba/F3 cells.                                       | Page 18  |
| <b>Figure S13.</b> Structural comparison of adagrasib and MRTX1257.                                                                                      | Page 19  |
| <b>Figure S14.</b> The workflow of KRAS <sup>G12C</sup> deep mutational scanning screen in Ba/F3 cells.                                                  | Page 20  |
| <b>Figure S15.</b> The correlation of Z-scores from the MRTX1257- and sotorasib-treated arms.                                                            | Page 21  |
| <b>Figure S16.</b> Structural mapping of deep mutational scanning results identifying on-target resistance mutations to KRAS <sup>G12C</sup> inhibitors. | Page 22  |
| <b>Figure S17.</b> Drug response curves in Ba/F3 stable cell lines.                                                                                      | Page 23  |
| <b>Figure S18.</b> Immunoblot results for G12C variants after 6-hour treatment with KRAS <sup>G12C</sup> inhibitors.                                     | Page 24  |
| <b>Figure S19.</b> Summary of validation of results from the deep mutational scanning screen.                                                            | Page 25  |
| <b>3) Supplementary tables</b>                                                                                                                           |          |
| <b>Table S1.</b> Patient characteristics and genomic alterations.                                                                                        | Page 26  |
| <b>Table S2.</b> Detailed deep mutational scanning screen results.                                                                                       | Page 28  |
| <b>Table S3.</b> Maximum Z-score and number of resistance mutations at each amino acid position.                                                         | Page 120 |
| <b>Table S4.</b> Alleles selected for validation experiments and their Z-scores in screen data.                                                          | Page 125 |
| <b>Table S5.</b> Summary of IC50 for individual alleles with each G12C inhibitor as measured in Ba/F3 single-allele drug resistance assays.              | Page 126 |
| <b>Table S6.</b> Summary of AUC, AUC change and Relative Resistance Score for each mutation.                                                             | Page 127 |
| <b>4) Supplementary references</b>                                                                                                                       | Page 128 |

## SUPPLEMENTARY METHODS

**Cell lines and KRAS<sup>G12C</sup> inhibitors:** 293T cells were from ATCC and cultured in DMEM with 10% FBS. The Ba/F3 cell line is a murine pro-B-cell line that was acquired from DSMZ (# ACC-300) and cultured in RPMI 1640 with 10% FBS and 10 ng/ml of murine IL3 (PeproTech; #213-13), except as otherwise indicated in the context of the screen. Ba/F3 cells require exogenous IL3 for survival at baseline; however, ectopic expression of oncogenes can confer IL3-independent proliferation and survival. MRTX1257 was provided by Mirati. The adagrasib (MRTX849) and sotarasib (AMG510) were purchased from MEDCHEM EXPRESS (# HY-130149 and HY-114277).

**Individual plasmid mutagenesis and generation of Ba/F3 stable cell lines.** QuikChange Lightning Site-Directed Mutagenesis Kit (Agilent; # 210519) was used to generate individual mutations from pMT025\_KRAS<sup>G12C</sup> plasmid template and sequences were confirmed by sanger sequencing. The mutant plasmids were transfected with packaging plasmids psPAX2 and pMD2.G in 293T cells and virus supernatant was harvested two days later. Ba/F3 cells were transduced by lentivirus with 8ug/ml DEAE-Dextran hydrochloride (Sigma Aldrich; # 30461) and puromycin selection was done at 1ug/ml 24 hour post viral infection to generate stable cell lines.

**Consensus sequence of KRAS<sup>G12C</sup> used as the template to generate the deep mutational scanning library:** The open reading frame (ORF) of the KRAS4B reference sequence (NM\_004985.5) was used as a template. Codon 12 (GGT) was mutated from Gly into Cys (TGT) and silent mutations were introduced at 6 wobble positions within 330-348. The final template DNA sequence for generation of the KRAS<sup>G12C</sup> mutational scanning library is indicated below and the G12C and silent mutations are underlined:

```
ATGACTGAATATAAACTTGTGGTAGTTGGAGCTTGTGGCGTAGGCAAGAGTGCCTT
GACGATACAGCTAATTCAGAATCATTTTGTGGACGAATATGATCCAACAATAGAGG
ATTCCTACAGGAAGCAAGTAGTAATTGATGGAGAAACCTGTCTCTTGGATATTCTC
GACACAGCAGGTCAAGAGGAGTACAGTGCAATGAGGGACCAGTACATGAGGACTG
GGGAGGGCTTTCTTTGTGTATTTGCCATAATAACTAAATCATTTGAAGATATTC
ACCATTATAGAGAACAATTAAAAAGAGTTAAGGACTCTGAAGATGTACCCATGGTG
CTGGTCGGCAACAAATGTGATTTGCCTTCTAGAACAGTAGACACAAAACAGGCTCA
GGACTTAGCAAGAAGTTATGGAATTCCTTTTATTGAAACATCAGCAAAGACAAGACA
GGGTGTTGATGATGCCTTCTATACATTAGTTTCGAGAAATTCGAAAACATAAAGAAAA
GATGAGCAAAGATGGTAAAAGAAGAAAAAGAAGTCAAAGACAAAGTGTGTAATTA
TG TAG
```

**Design and generation of KRAS<sup>G12C</sup> deep mutational scanning library:** To design a lentiviral library encoding all possible alleles with a single amino acid substitution in the KRAS<sup>G12C</sup> backbone allele, we selected one codon for each of 19 missense mutations and one nonsense (stop) codon at each amino acid position of the open reading frame (ORF) of KRAS<sup>G12C</sup>, using the reference sequence indicated above. In addition, we also designed synonymous mutations at every amino position for which silent changes could



be achieved with 2 or 3 nucleotide changes (n = 30 total silent mutations in the library). The starting variant library was synthesized at Twist BioScience as a pool of linear ORF fragments and was cloned into the pMT\_025 vector (Addgene #158579). The resulting pooled plasmid DNA ORF variant library was sequenced via Illumina Nextera XT platform to determine the distribution of variants within the library. The final library contained 3704 total unique variants, with all amino acid positions represented except for codons at positions S65, E98, T158 of the protein. 293T viral packaging cells were transfected using TransIT-LT1 transfection reagent (Mirus Bio) with three plasmids: the pooled ORF pDNA library, a packaging plasmid containing gag, pol and rev genes (psPAX2, Addgene), and an envelope plasmid containing VSV-G (pMD2.G, Addgene). Media was changed 6-8 hours after transfection and virus was harvested 24 hours thereafter.

### **Deep mutational scanning screen for KRAS<sup>G12C</sup> resistance mutations in Ba/F3 cells.**

Deep mutational scanning is an approach that utilizes massively parallel sequencing to simultaneously measure the functional impact of many variants in a protein in a single experiment.<sup>1-3</sup> To perform deep mutational scanning of the KRAS<sup>G12C</sup> protein, we utilized the above described lentiviral library encoding nearly all possible alleles with a single amino acid substitution in the KRAS<sup>G12C</sup> backbone allele. A positive-selection screen for mutations in KRAS<sup>G12C</sup> that confer resistance to KRAS<sup>G12C</sup> inhibition was performed in Ba/F3 cells cultured for 7 days in the absence of IL3 and in the presence of one of two KRAS<sup>G12C</sup> inhibitors, MRTX1257 (a compound highly related to adagrasib)<sup>4</sup> or sotorasib. Briefly, Ba/F3 cells were cultured in RPMI medium with 10% FBS and 10 ng/ml of murine IL3 were mixed with 8ug/ml DEAE-Dextran hydrochloride and the lentiviral mutagenesis library at a multiplicity of infection (MOI) of around 0.14 in 12 well plates and spin-infection was performed at 2000 rpm for 2 hours at 30°C. Ba/F3 cells were transduced with this library at a representation of over 1000 cells per allele in triplicate. New media was added and the plates were incubated overnight at 37°C, 5% CO<sub>2</sub>. On the following day, cells were washed with PBS and changed into IL3 medium with 1ug/ml puromycin. After two days with puromycin selection, cells were harvested at full representation as the IL3 arm. The remaining cells were washed with PBS and changed into culture medium without IL3. Two days after IL3 removal, cells were divided into three arms and treated with DMSO, MRTX1257 at 20 nM or sotorasib at 800 nM. Medium with each drug or DMSO was changed every three days. Cells were harvested after 6 days of drug treatment for genomic DNA isolation, library preparation and deep sequencing.

**Nextera sequencing and data processing.** Genomic DNA was harvested for each time point in the screen and alleles were PCR amplified. PCR reactions were set up in 96-well plates using two primers: Forward: 5'-ATTCTCCTTGGGAATTTGCCCTT-3'; Reverse: 5'-CATAGCGTAAAAGGAGCAACA-3'. and Q5 DNA polymerase (New England Biolabs). All PCR reactions for each gDNA sample were pooled, concentrated with a PCR cleanup kit (QIAGEN), and separated by gel electrophoresis. Bands of the expected size were excised and DNA was purified using a QIAquick kit (QIAGEN) followed by an AMPure XP kit (Beckman Coulter). Nextera reactions were performed according to the Illumina Nextera XT protocol and sequenced using an Illumina Nextseq flowcell at a depth

corresponding to a sample average of 1300 perfectly mapping reads for each individual library variant. The reads were processed with a second-generation variant calling software called AnalyzeSaturationMutagenesis (as part of GATK, downloadable at (<https://github.com/broadinstitute/gatk/releases>)). Raw read pairs were aligned to the ORF reference sequence and those that exactly matched to library variant sequences (perfect throughout both paired reads) were used to count the reads attributable to each variant.

**Variant analysis from deep mutational scanning screen:** Reads were aligned to KRAS reference sequence and collapsed to reads per amino acid at each position and for each variant amino acid. Abundance of each variant was calculated by the fraction of its read compared to the total reads of all variants in each sample. Log2 Fold Change was the fold change between reads from Day 6 compared to Day 0 before IL3 removal. Log2 Fold Change data for each allele were imported in R (version 4.0.2) and were then Z-score normalized independently for each arm representing the abundance of each allele at the endpoint of the drug-treated arms compared with the early pretreatment time point. Relative enrichment was plotted in relation to the primary amino acid sequence of the KRAS<sup>G12C</sup> protein. The heatmaps were generated using the pheatmap R package (<https://cran.r-project.org/web/packages/pheatmap/index.html>).

**Z-score threshold for resistance:** To identify the alleles inducing resistance to each of the KRAS<sup>G12C</sup> inhibitors in the screen, we used as cutoff values the average Z-score + 2 standard deviations of all the silent mutations in each treated arm. The cutoff values for resistance to both inhibitors were a Z-score of 1.25 for MRTX1257 and 1.5 for sotorasib.

**Drug response curves for KRAS<sup>G12C</sup> inhibitors and validation of resistance mutations:** Ba/F3 cells were seeded at 1000 cells/well in 96-well plates (Corning; # 3903) and directly treated with KRAS<sup>G12C</sup> inhibitors by adding adagrasib (0.1nM to 10µM) or sotorasib (1nM to 10µM) with a Tecan D300e drug dispenser. Viability was assessed 5 days post-treatment using the CellTiter-Glo 2.0 (Promega; # G9242) on a FLUOstar Omega microplate reader according to the manufacturer's protocol. Percentage viability was calculated by normalizing treated wells to DMSO treated control samples. Curves were fit with nonlinear sigmoid functions, forcing the low-concentration asymptote to 100% viability to represent the DMSO control treatment using a four-parameter curve in GraphPad Prism.

**Calculation of IC<sub>50</sub>, AUC and relative resistance score:** The IC<sub>50</sub> values for each drug were determined with GraphPad Prism using a four-parameters drug response curve. Viability data for each allele with each inhibitor were imported in R (version 4.0.2) and treated with the nplr R package (<https://cran.r-project.org/web/packages/nplr/index.html>) to calculate the AUC of the fitted curves. The relative resistance score (RRS) for each allele were generated through the scaling of all the AUC values between the AUC values of KRAS<sup>G12C</sup> and KRAS<sup>G12R</sup>, using the following formula:

$$\text{Relative Resistance Score} = \frac{(\text{AUC of allele} - \text{AUC of KRAS G12C})}{(\text{AUC of KRAS G12R} - \text{AUC of KRAS G12C})}$$

G12C serves as a sensitive control with an RRS of 0, and G12R is the strongest resistance mutation in the validation list with an RRS of 1.

### **Mapping of phenotypic data onto structures:**

Mapping and graphical display of phenotypic data from the deep mutational scanning experiments onto KRAS crystal structures were performed with the UCSF Chimera package. Phenotypes were mapped using the 'define by attribute' and 'render by attribute' functions of the program. For each amino acid position in the structure, we indicated degree of maximal resistance phenotype per position and indicated the z-score of that Log-(2)-fold-change as an intensity of the color red. The number of substitutions producing resistance phenotypes above the Z score threshold defined above (2 standard deviations above from the average z-score of silent mutations: 1.25 for MRTX1257 and 1.5 for sotorasib) were represented as a gradient using 0.25 to 2 width of the worm size representing 2 to 19 substitutions scoring at that position. Phenotypes were mapped onto PDB 6UT0<sup>5</sup> (illustrating KRAS bound to analogue compound adagrasib) for MRTX1257 resistant mutations and PDB 6OIM<sup>6</sup> for sotorasib resistant mutations.

**Immunoblotting.** Cells were lysed in RIPA Lysis and Extraction Buffer (Life Technologies; # 89900) with Halt Phosphatase Inhibitor Cocktail (Life Technologies; #78420) and Halt Protease Inhibitor Cocktail (Life Technologies; # 87785) and lysates were run on NuPAGE™ 10%, Bis-Tris, 1.5 mm, Mini Protein Gel (Life Technologies; # NP0316BOX). Experiments were done at least three repeats for each line. The antibodies used from Cell Signaling Technology were phospho-p44/42 MAPK (#4370S), p44/42 MAPK (#4695), phospho-Akt (Ser473) (#4060), Akt (#9272), phospho-S6 (Ser240/244) (#2215), S6 (5G10) (#2217) and Vinculin (#4650S). Anti-KRAS rabbit polyclonal antibody was from Proteintech (# 12063-1-AP).

**Fluorescence In-Situ Hybridization (FISH).** FISH analysis was performed on formalin-fixed paraffin-embedded (FFPE) tissue. The slide was baked overnight at 50°C, deparaffinized, and rehydrated through a graded ethanol series. The sample underwent pretreatment and protease digestion using the Cytocell Tissue Pretreatment Kit, followed by dehydration through a graded ethanol series. Following the addition of Empire Genomics' KRAS/CEN12 probe, the sample was denatured and hybridized overnight. After post-hybridization washing, the slide was counterstained with 4',6-diamidino-2-phenylindole (DAPI). FISH images were captured using a 60x oil objective (BZ-X800 fluorescent microscope, Keyence).

**FoundationOne Liquid CDx.** NGS of ctDNA was performed on ≥ 20ng of ctDNA extracted from blood plasma to create adapted sequencing libraries before hybrid capture and sample-multiplexed sequencing to a median unique exon coverage depth of >6,000X for up to 70 genes.<sup>7</sup> Results were analyzed for base substitutions, short insertions and deletions (indels), copy number alterations, and rearrangements. Testing was performed in a CLIA-certified/CAP-accredited laboratory (Foundation Medicine Inc., Cambridge, MA).

# Figure S1

**A**

Pretreatment

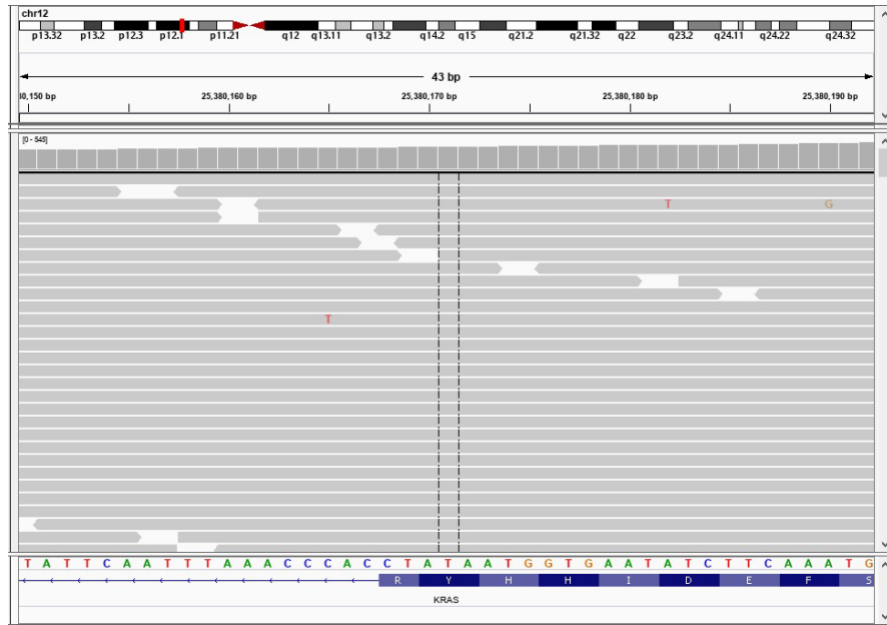

**B**

Resistance to adagrasib

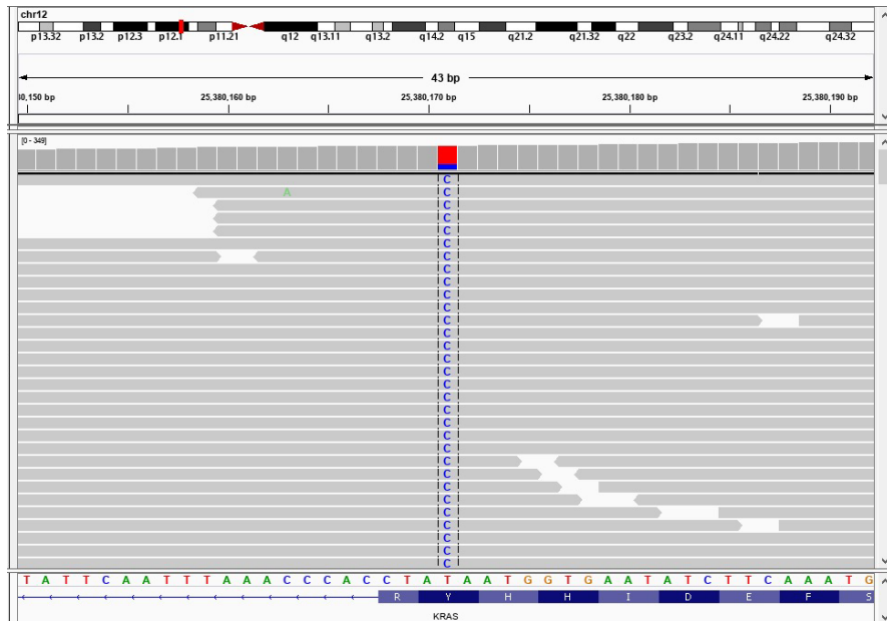

**Figure S1. Y96C alignments in IGV for Case 1.** Integrative Genomics Viewer (IGV) plots of *KRAS* DNA sequence encoding amino acid position 96 from the (A) pretreatment and (B) adagrasib-resistant samples for case 1. Antisense readings are shown demonstrating the TAT to TGT (Y96C) mutation identified after resistance.

## Figure S2

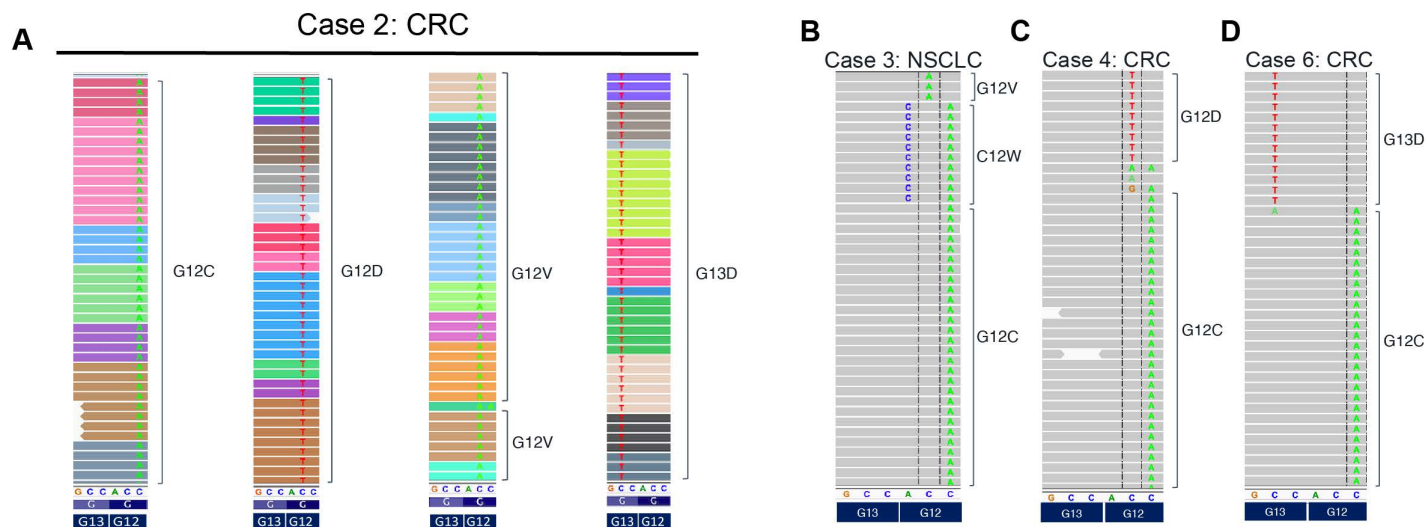

**Figure S2. Cis/trans status for selected *KRAS* mutations at codons 12 and 13.** Integrative Genomics Viewer (IGV) plots (antisense reading) of *KRAS* codons 12 and 13 showing the cis/trans (same sequence read vs. different sequence read) status of acquired mutations for (A) case 2, (B) case 3, (C) case 4, and (D) case 6. Case 2 demonstrates the GGT to IGT mutation (encoding for G12C), the GGT to GAT mutation in trans (encoding for G12D), the GGT to GIT mutation in trans (encoding for G12V) and the GGC to GAC mutation in trans (encoding for G13D). In addition, sequence reads from case 2 also demonstrated a G12R (c.34G>C) mutation, although it could not be determined whether this arose through a c.34\_36 GGT (Gly) to CGT (Arg) mutation or a IGT (Cys) to CGT (Arg) mutation (data not shown, Table S1). Case 3 demonstrates the TGI to TGG mutation in cis, resulting in a C12W mutation (noted as G12W in reference to the wild type *KRAS* sequence) and the GGT to GIT mutation in trans (encoding for G12V). Cases 4 and 6 show a G12D and G13D mutation in trans, respectively.

# Figure S3

Breakpoints:  
AKAP9 intron 28 (chr7:91701220)  
BRAF intron 8 (chr7:140493457)

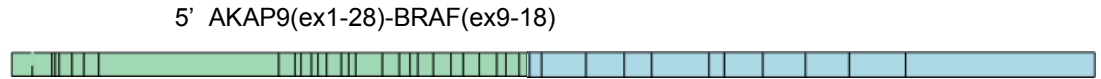

Breakpoints:  
NRF1 exon 9 (chr7:129357138)  
BRAF intron 10 (chr7:140481577)

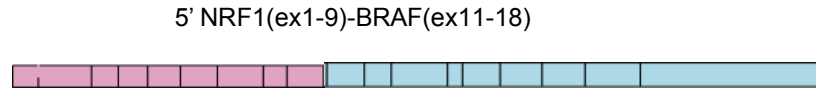

Breakpoints:  
FGFR3 exon 18 (chr4:1808933)  
TACC3 intron 5 (chr4:1732780)

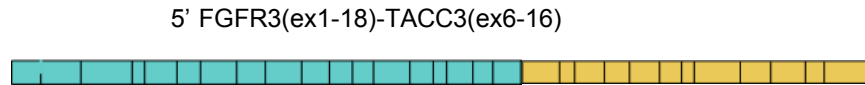

Breakpoints:  
RAF1 intron 7 (chr3:12645483)  
TRAK1 intron 5 (chr3:42231967)

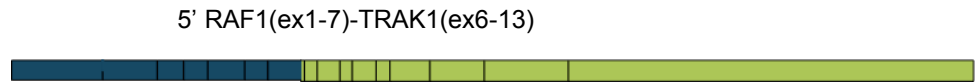

**Figure S3. Schematic of selected gene fusions identified in case 6.** Schematic depictions are shown for several chromosomal rearrangements identified in case 6 (CRC) through FoundationOne Liquid testing. Analysis based on the hg19 reference human genome assembly.

# Figure S4

**A**

**SPECIMEN:**

1. FFPE Block A1
2. Approximate Tumor %: 30

**DIAGNOSIS:**

1. Poorly-differentiated non-small cell carcinoma, consistent with adenocarcinoma

**INTERPRETATION:**

1. Tier I Variants (Strong Clinical Significance) identified:

| GRCh37 Position | Gene | RefSeq      | Variant (Coding) | Variant (Protein) | VAF (%) | COSMIC ID |
|-----------------|------|-------------|------------------|-------------------|---------|-----------|
| 12:25398285     | KRAS | NM_004985.4 | c.34G>T          | p.G12C            | 39.4    | COSM518   |

**B**

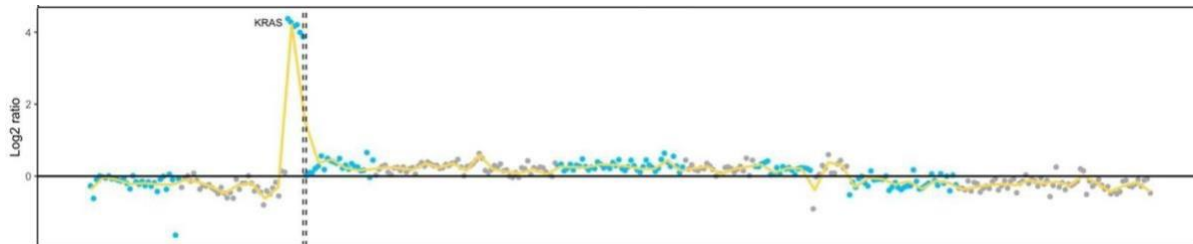

**C**

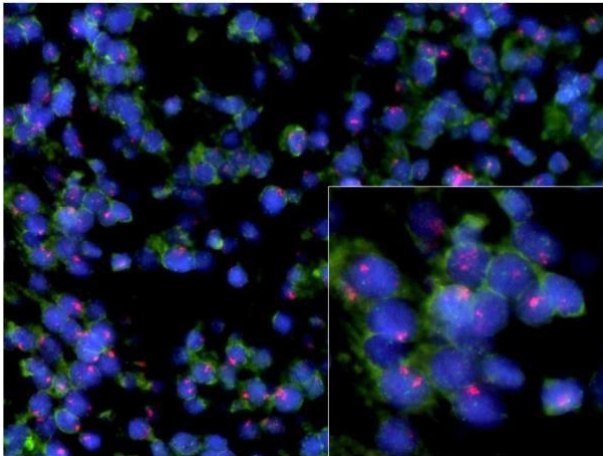

**Figure S4.  $KRAS^{G12C}$  amplification at adagrasib resistance for case 7.** (A) This de-identified pretreatment genomics report for case 7 demonstrates a tumor content of ~30% and a  $KRAS^{G12C}$  variant allele fraction (VAF) of 39.4%. The tissue had been exhausted and was not available for further analysis. (B) At adagrasib resistance, this DFCI OncoPanel copy plot indicated high-level focal  $KRAS^{G12C}$  amplification, with an estimated ~45 copies of the  $KRAS^{G12C}$  mutant allele ( $KRAS^{G12C}$  VAF was 95%). (C) Fluorescence in situ hybridization (FISH) evaluation of  $KRAS$  (performed at Boundless Bio) at adagrasib resistance shows intense, heterogeneous amplifications of  $KRAS$  in tumor cells (red), with both punctate and highly aggregated patterns present across the tissue; two normal copies of centromere 12 (green) were present in most nuclei, counterstained with DAPI (blue). The inset shows higher magnification.

# Figure S5

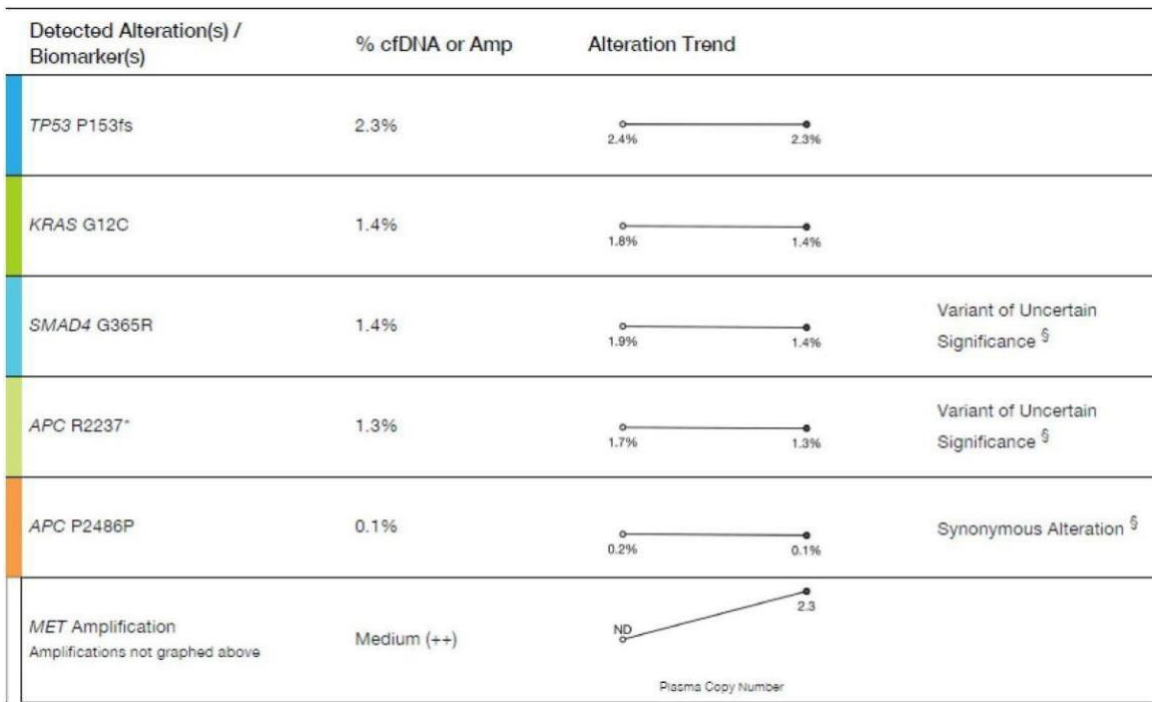

**Figure S5. Acquired *MET* amplification in case 10.** This de-identified Guardant360 circulating tumor DNA report shows acquired *MET* amplification as the only apparent genomic change between baseline prior to adagrasib initiation (left points on Alteration Trend lines) to the time of adagrasib resistance (right points on Alteration Trend lines).



## Figure S6

Pretreatment  
Baseline

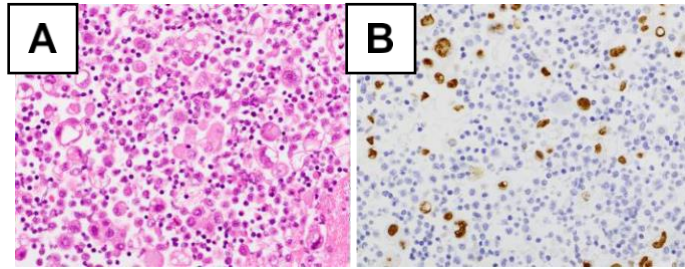

Adagrasib-  
resistant  
sample #1  
(bone biopsy)

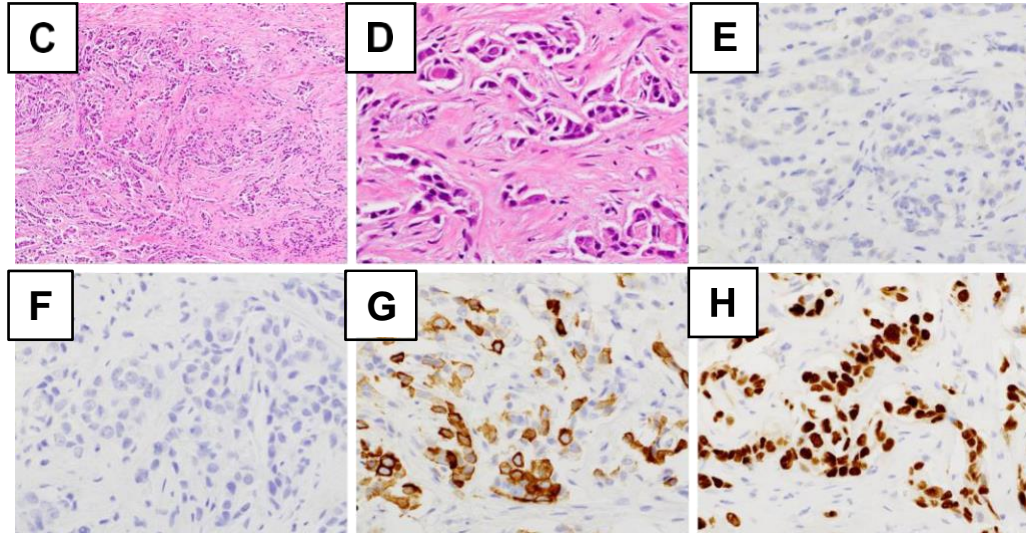

Adagrasib-  
resistant  
sample #2  
(lung biopsy)

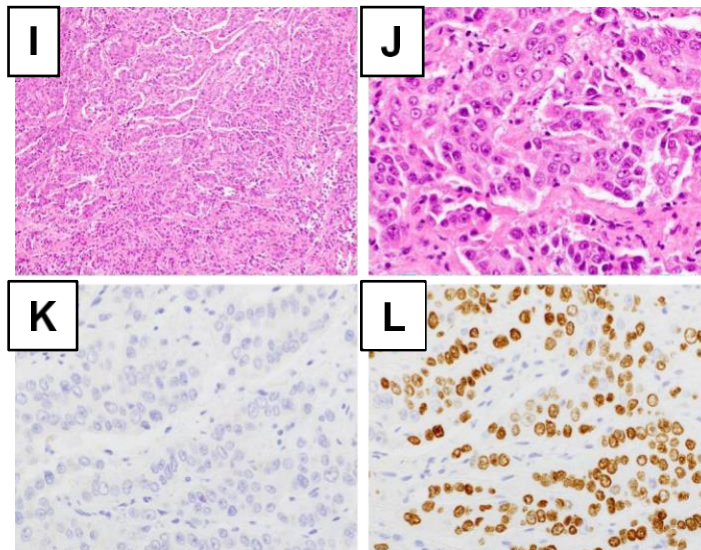

**Figure S6. Lung squamous cell transformation observed in case 12.** (A) Prior to adagrasib initiation, right pleural fluid contained scattered malignant cells consistent with adenocarcinoma in a background of reactive mesothelial cells and chronic inflammation (hematoxylin-eosin, 400x magnification). (B) Immunohistochemistry for TTF1 highlights the nuclei of the metastatic lung adenocarcinoma (400x magnification). (C) At time of adagrasib resistance, a right iliac wing core biopsy demonstrates groups of malignant cells amongst fibrous stroma (hematoxylin-eosin, 100x magnification). (D) At high magnification, tumor cells show a squamoid appearance with defined cell borders (hematoxylin-eosin, 400x magnification). By immunohistochemistry, tumor cells are negative for TTF1 (E) and Napsin A (F) but show multifocal staining for cytokeratin 5/6 (G) and strong diffuse staining for p40 (H), confirming the presence of squamous differentiation. (I) A right upper lobe lung biopsy at the time of adagrasib resistance demonstrates cohesive nests of malignant cells (hematoxylin-eosin, 100x magnification). (J) At high magnification, tumor cells show a poorly-differentiated non-small cell histology with conspicuous nucleoli (hematoxylin-eosin, 400x magnification). By immunohistochemistry, tumor cells are negative for TTF1 (K) and show diffuse strong staining for p40 (L), confirming squamous differentiation. All immunohistochemical stains (for TTF1, Napsin A, cytokeratin 5/6, and p40) were performed on routine automated diagnostic staining platforms.

## Figure S7

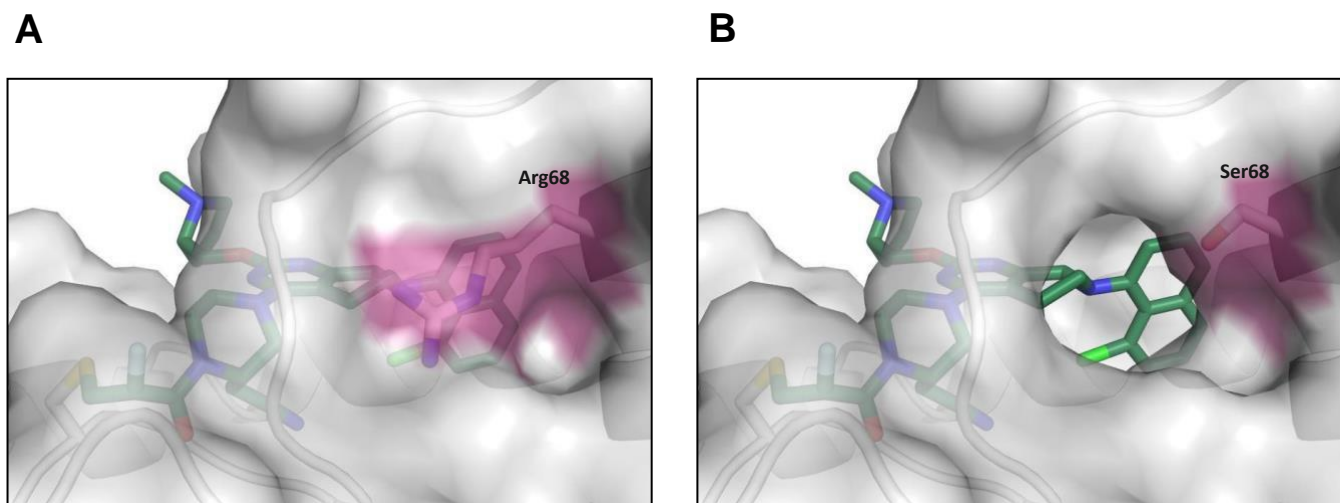

### Figure S7. Structural basis of adagrasib resistance of KRAS R68S mutation.

(A) A comparison of adagrasib (green sticks) bound to KRAS G12C (PDB code 6ut0) and (B) to a model of the G12C/R68S double mutant. The surface corresponding to residue 68 is highlighted in purple. The R68 sidechain packs against both the piperidine and naphthyl moieties of adagrasib. Mutation of the arginine residue to the smaller serine removes these favorable Van der Waals interactions and reduces shape complementarity to the Switch II pocket. Furthermore, R68 may play a role in maintaining the binding nascent conformation of the Switch II pocket through scaffolding effects anchored by hydrogen bonds to the backbone of residues A59 and Q61 (not shown).

## Figure S8

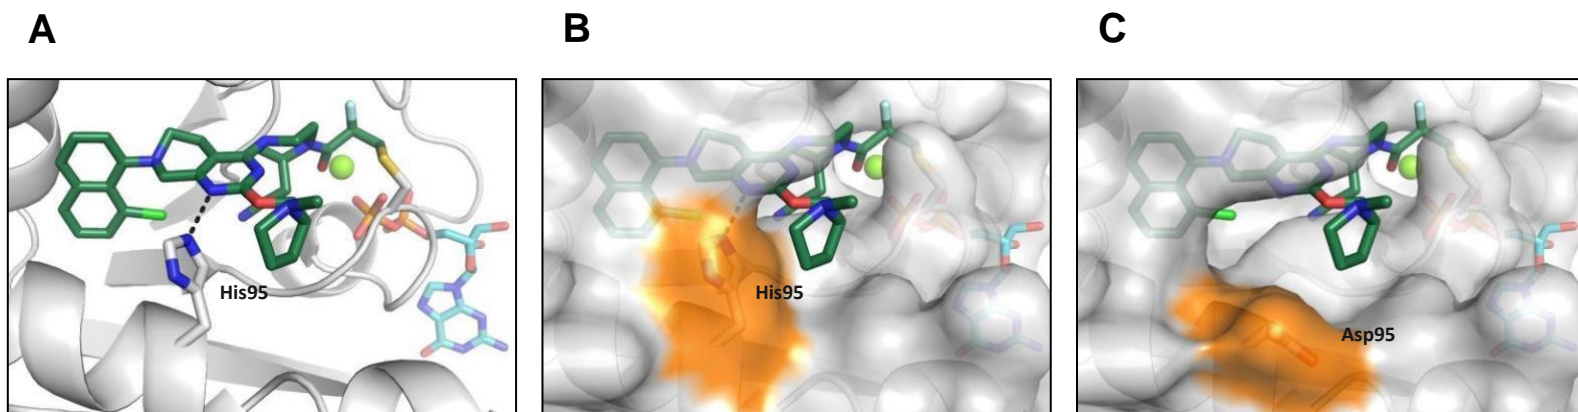

**Figure S8. Structural basis of adagrasib resistance for the KRAS H95D mutation.** (A, B) A comparison of adagrasib (green sticks) bound to KRAS G12C (PDB code 6ut0) and (C) to a model of the G12C/H95D double mutant. The surface corresponding to residue 95 is highlighted in orange. Mutation of the histidine residue to an aspartate disrupts a favorable hydrogen bond interaction to adagrasib's pyrimidine moiety (black dashed line in A and B). Asp95 (C) likely swings out of the binding site without being held in place with the hydrogen bond. This leads to an additional loss of binding energy via diminished shape complementarity of the Switch II pocket and loss of the scaffolding interaction with the pyrrolidine ring.



**Figure S9**

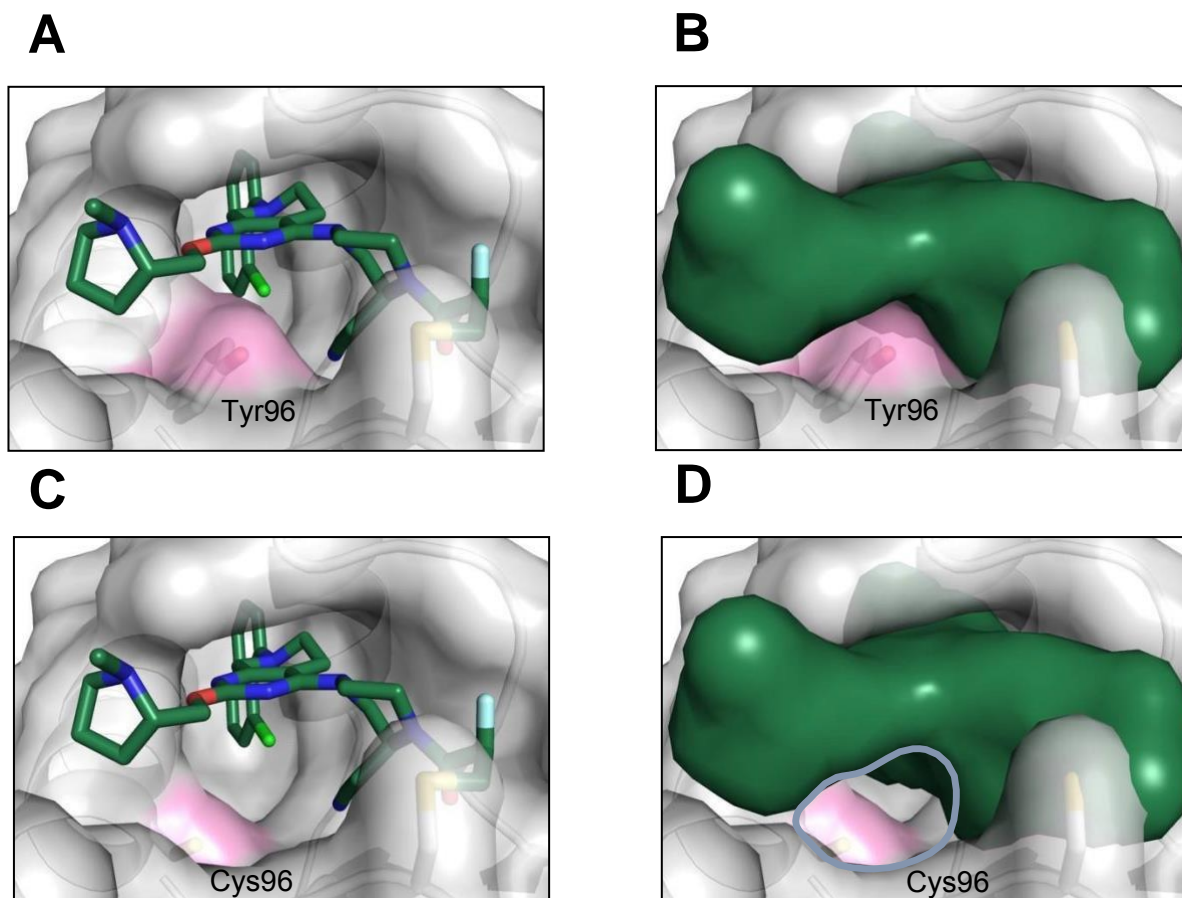

**Figure S9. Structural basis of adagrasib resistance of KRAS Y96C mutation.** A comparison of adagrasib (green sticks and surface) bound to KRAS G12C (PDB code 6ut0) (panels **A** and **B**) and to a model of the G12C/Y96C double mutant (panels **C** and **D**). The surface corresponding to residue 96 is highlighted in pink. Mutation of the much larger tyrosine to a cysteine in the bottom of the Switch II pocket creates a cavity (highlighted by the grey line in panel **D**) that removes a substantial amount of Van der Waals interaction energy including an edge/face interaction between the tyrosine and the pyrimidine moiety of adagrasib.

# Figure S10

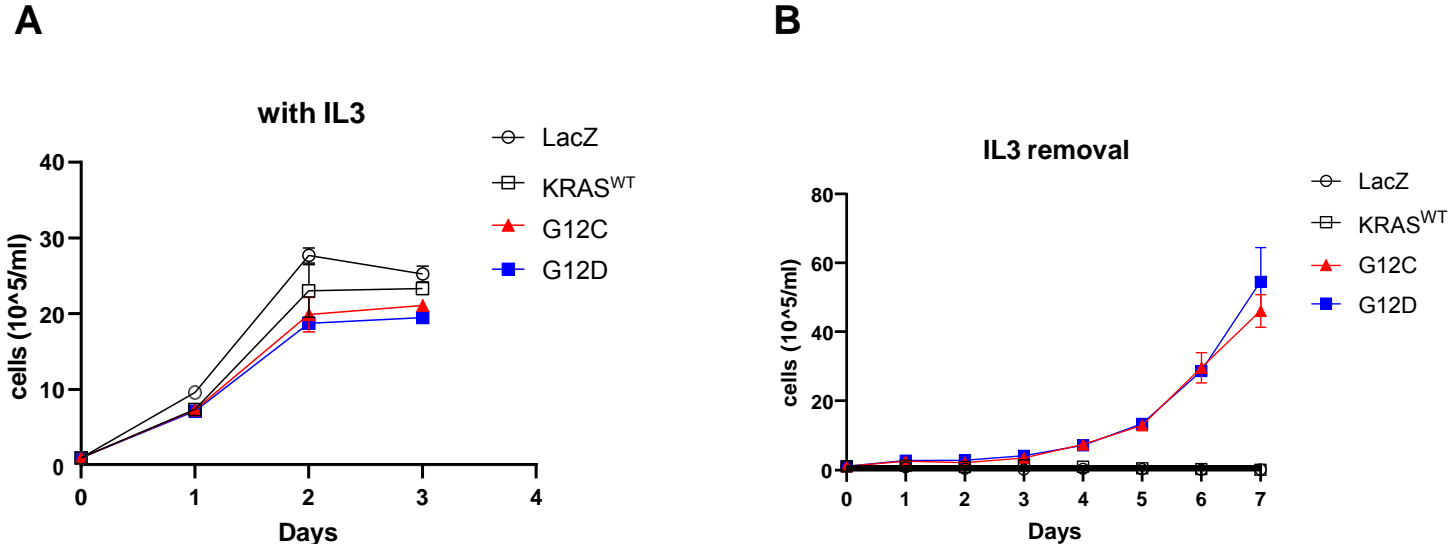

**Figure S10. KRAS<sup>G12C</sup> mediates IL3-independent survival of Ba/F3 cells.** Ba/F3 cells were lentivirally transduced with LacZ, KRAS<sup>wt</sup>, KRAS<sup>G12C</sup> or KRAS<sup>G12D</sup> and were cultured in 6-well plates in the presence (A) or absence (B) of IL3. Cell number was counted daily. The curves were shown as mean  $\pm$  SEM from three independent experiments. The cells reached maximum density on day 3 with IL3 (A).

# Figure S11

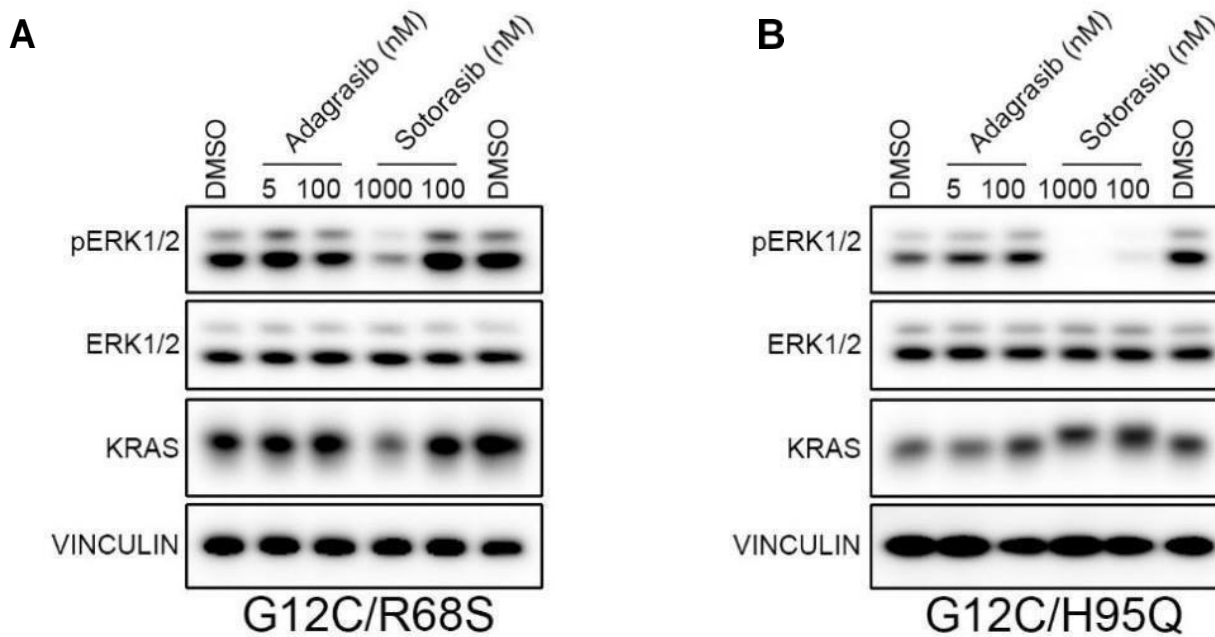

**Figure S11. Immunoblot results for G12C/R68S and G12C/H95Q treated with KRAS<sup>G12C</sup> inhibitors.** Ba/F3 cells expressing KRAS<sup>G12C/R68S</sup> (A) or KRAS<sup>G12C/H95Q</sup> (B) were treated with adagrasib or sotorasib for 6 hours and immunoblots were performed to assess the ERK phosphorylation and total KRAS protein levels.

# Figure S12

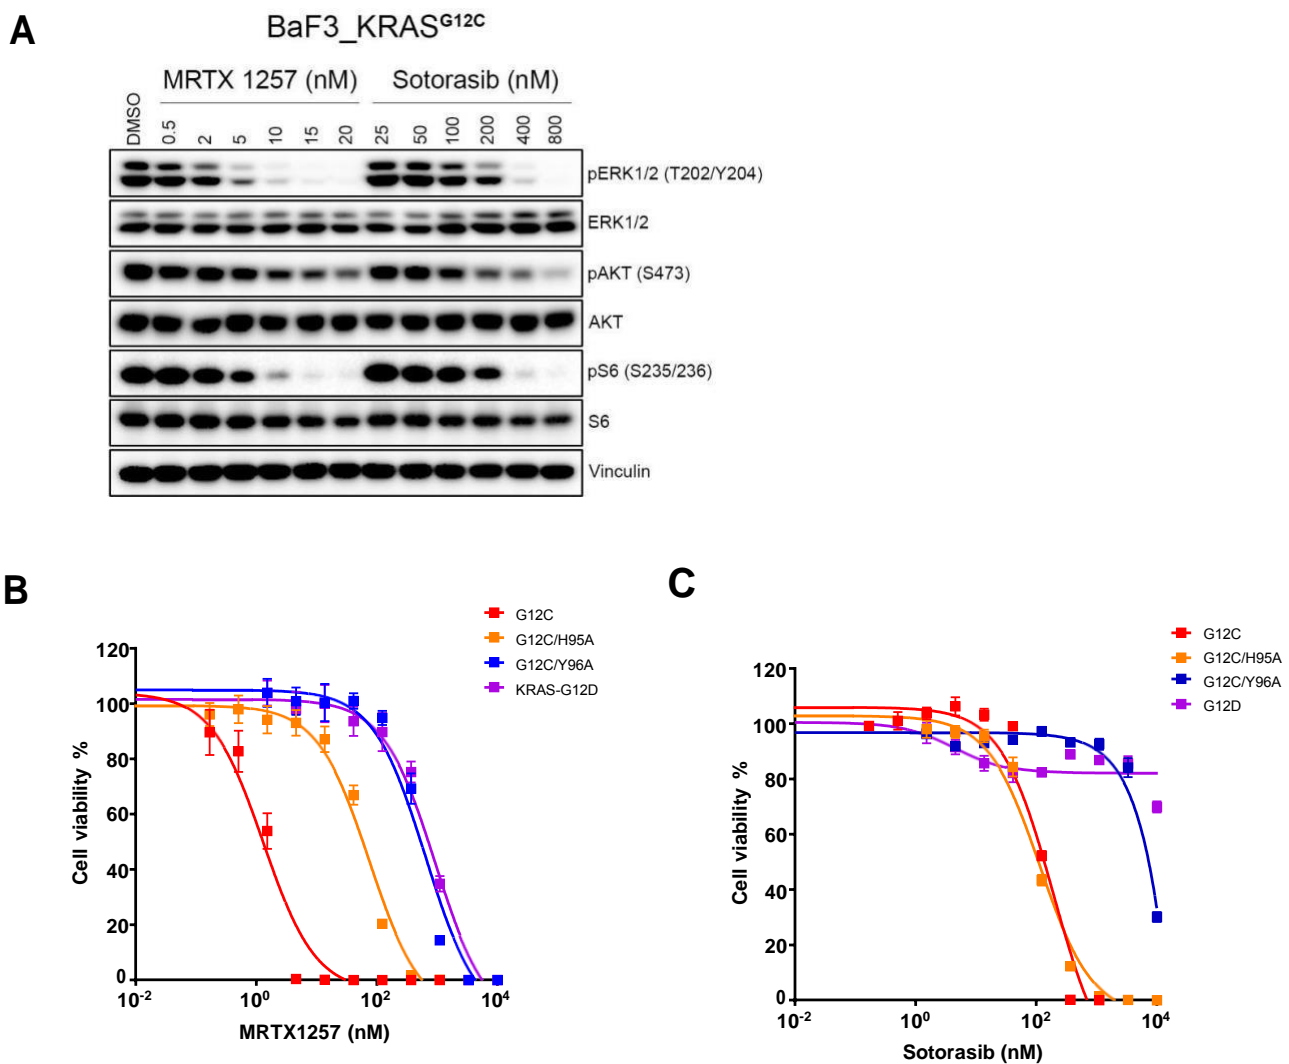

**Figure S12. Optimization of KRAS<sup>G12C</sup> inhibitor doses for the mutagenesis screen in Ba/F3 cells.** (A) Ba/F3\_KRAS<sup>G12C</sup> cells were treated with indicated concentrations of MRTX1257 or sotorasib for 6 hours and KRAS effector signaling pathways were assessed by immunoblot. The drug response curves for MRTX1257 (B) and Sotorasib (C). Ba/F3 cells expressing the indicated alleles of KRAS<sup>G12C</sup>, KRAS<sup>G12C/H95A</sup>, KRAS<sup>G12C/Y96A</sup> or KRAS<sup>G12D</sup> were seeded into 96-well plates and treated with increasing doses of (B) MRTX1257 or (C) sotorasib for 5 days and analyzed by CellTiter-Glo assays. Based on these data, MRTX1257 at 20 nM and sotorasib at 800nM was used in the screen.

## Figure S13

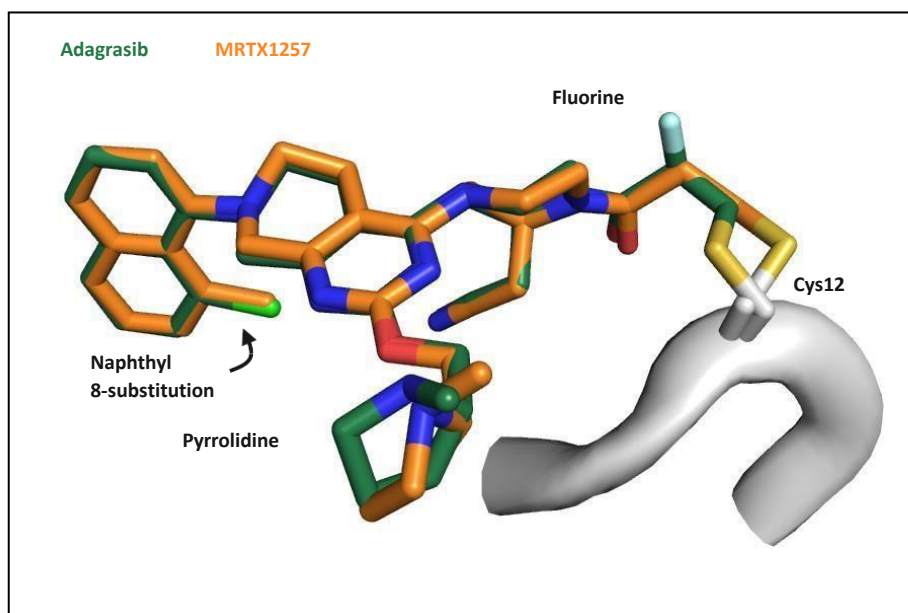

**Figure S13. Structural comparison of adagrasib and MRTX1257.** An overlay of adagrasib (PDB code 6ut0) and MRTX1257 bound to KRAS G12C. During the optimization of MRTX1257 to adagrasib, the 8-methyl group of the naphthyl was replaced with a chlorine and a fluorine was added to the acrylamide. Neither feature substantially changes the molecular interactions with the protein, and we believe that resistance mutations that affect MRTX1257 would have similar effects against adagrasib. This hypothesis is supported by the overlay of the two crystal structures as the only variations are a slight change in the position of the pyrrolidine moiety and the orientation of the covalent bond to Cys12. Both are commonly observed heterogeneities in this crystallographic system, observed across (and within) several related co-crystal structures over the course of the program.



# Figure S14

A

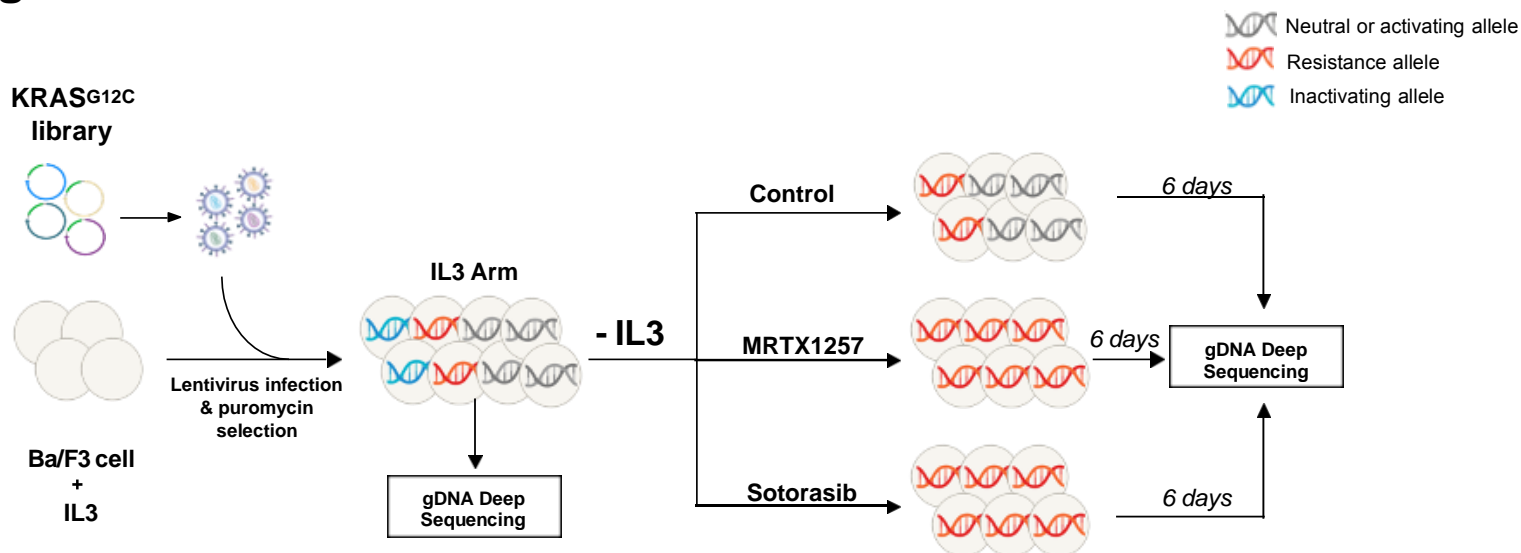

B

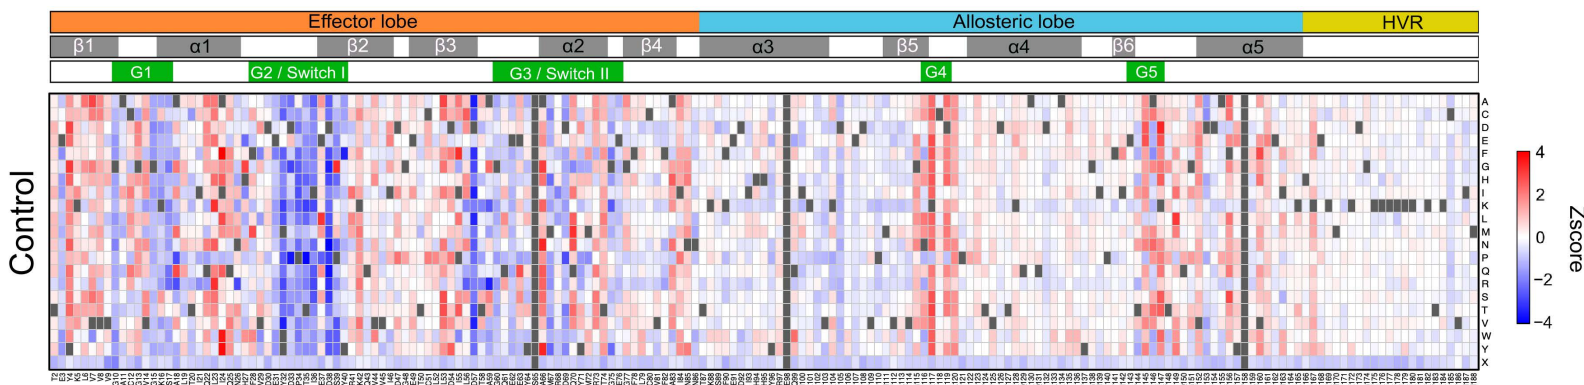

**Figure S14. The workflow of KRAS<sup>G12C</sup> deep mutational scanning screen in Ba/F3 cells.** (A) Screen workflow. Parental Ba/F3 cells were first cultured with mIL3 and then transduced with the KRAS<sup>G12C</sup> mutagenesis lentiviral library followed by puromycin selection. Some cells were harvested immediately after puromycin selection to establish the full representation of the alleles in the library at an early IL3-treated time point (“IL3 arm”) and to use this time point as a baseline for allele abundance in comparison to drug-treated endpoints. Next, the remaining cells were changed into mIL3-free medium. Cells that survived in the absence of mIL3 (only cells with oncogenic G12C alleles) were further divided into three arms of the screen: 1) DMSO control arm; 2) MRTX1257 arm treated with 20 nM of MRTX1257; 3) Sotorasib arm treated with 800 nM of Sotorasib. There were three replicate samples for each arm. (B) Z-scores of DMSO control arm were shown as a heatmap. The red indicated enrichment while the blue indicated depletion of alleles after IL3 removal, which suggest increase or decrease of KRAS<sup>G12C</sup> activity by these mutations, respectively.

# Figure S15

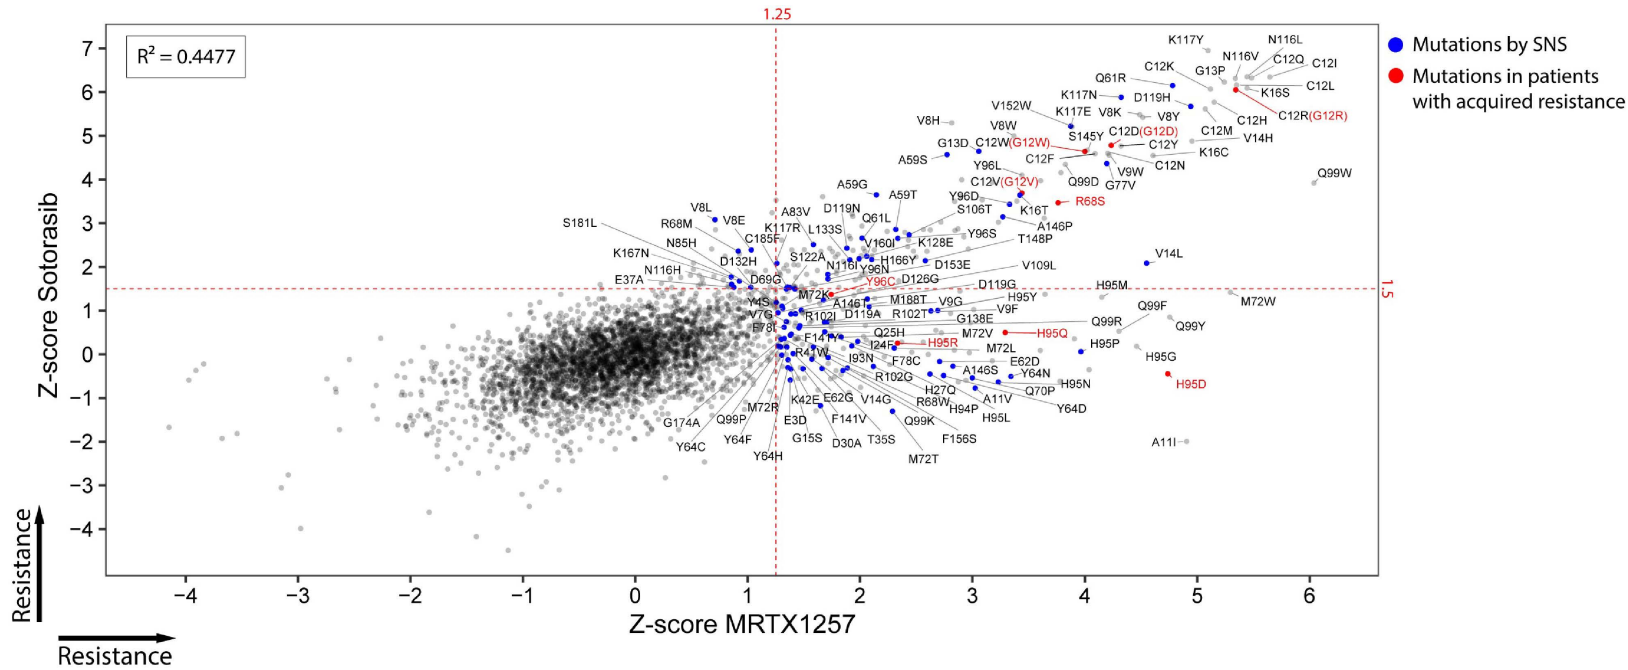

**Figure S15. The correlation of Z-scores from the MRTX1257- and sotorasib-treated arms.** Scatter plot showing the Z-scores for mutations from the sotorasib resistance screen (y-axis) versus the Z-scores from screen with the adagrasib-related compound MRTX1257 (x-axis). The blue dots indicate putative resistance mutations arising from a single nucleotide substitution (SNS), the most common mechanism of missense mutation in human cancers. Red dots mark the clinically identified mutations in patients with acquired resistance to adagrasib. Dotted red lines indicate a threshold for statistical significance of resistance alleles, defined as the mean + 2 standard deviations (SD) of the Z-scores for all negative control silent mutations in each treated arm of the screen. At this Z-score threshold, 95/298 MRTX1257-resistance mutations and 41/164 sotorasib-resistance mutations could occur by single nucleotide substitution.

# Figure S16

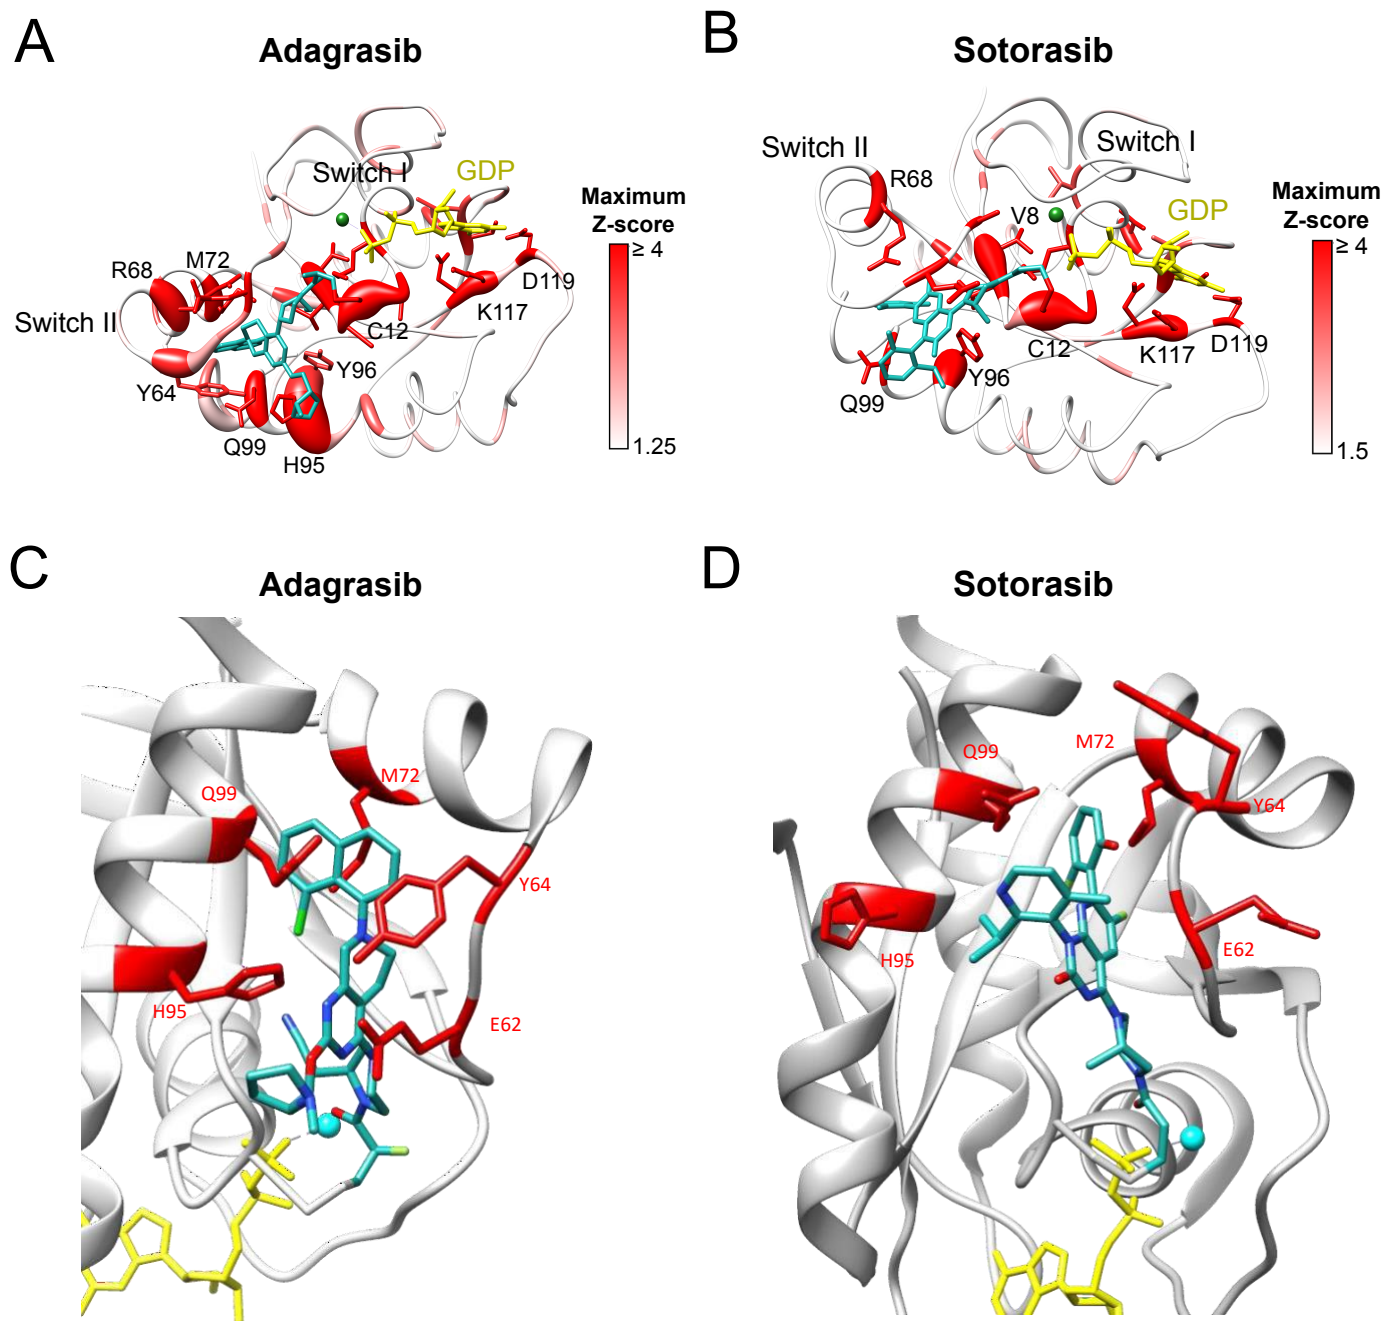

**Figure S16. Structural mapping of deep mutational scanning results identifying on-target resistance mutations to KRAS<sup>G12C</sup> inhibitors. (A-B)** Putative second-site resistance mutations identified in the deep mutational scanning screen indicated in Figure 5 were mapped onto crystal structures of KRAS<sup>G12C</sup> bound to adagrasib (A) or sotorasib (B). Maximum Z-score at each position (most resistant allele) is indicated by the degree of red coloration and the size of each position corresponds to the number of mutations scoring as resistant in the screen (Supplementary Methods, Table S3). (C-D) Conformation difference in the binding sites of adagrasib (C) and sotorasib (D). Side chains of E62, Y64, M72, H95 and Q99 residues in KRAS<sup>G12C</sup> are represented in red sticks in each binding sites for adagrasib and sotorasib.

# Figure S17

**A**

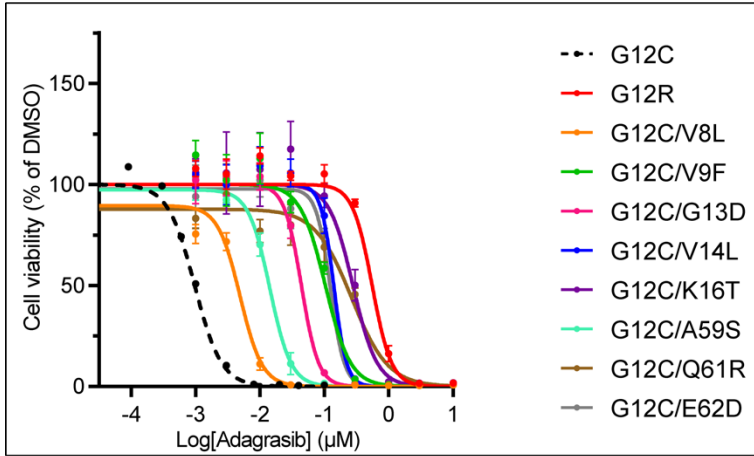

**B**

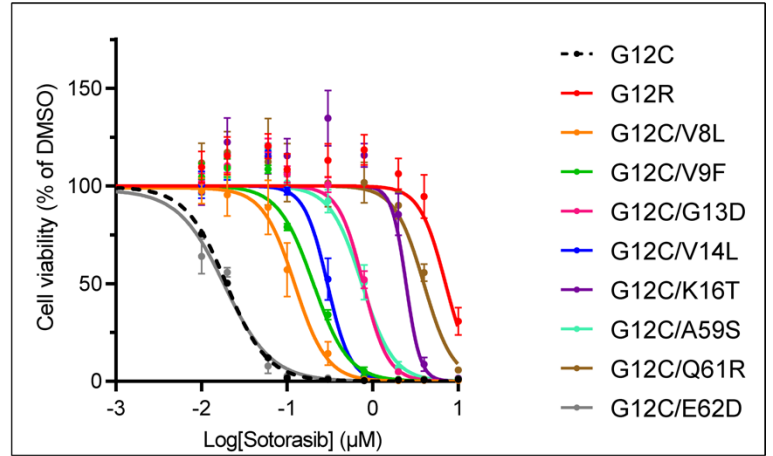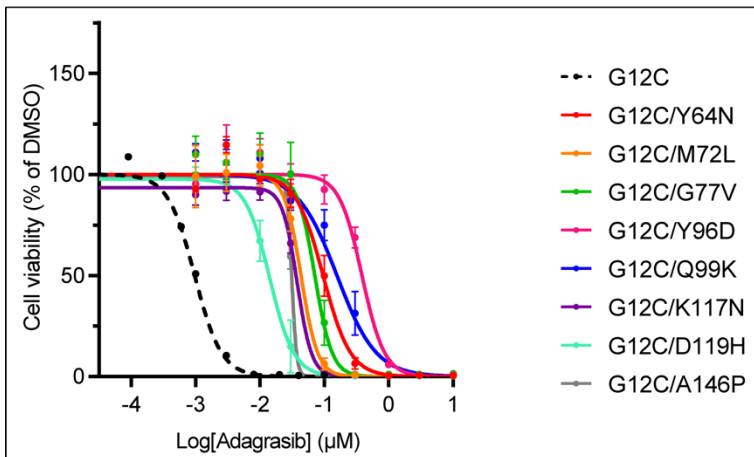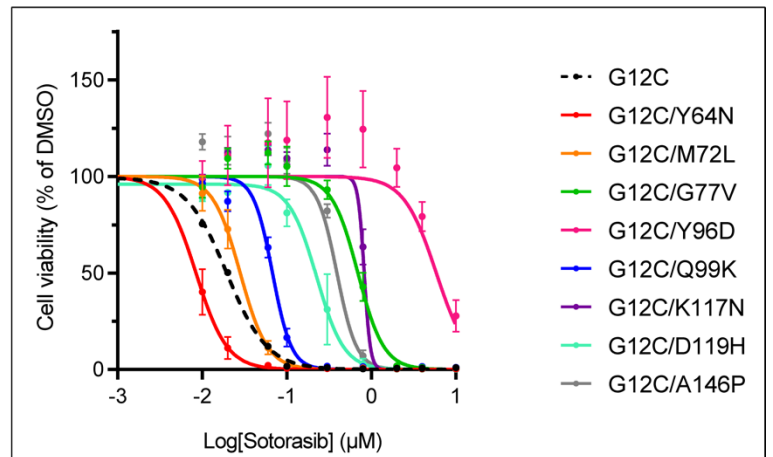

**Figure S17. Drug response curves in Ba/F3 stable cell lines.** Ba/F3 cells expressing the indicated variant were treated with (A) adagrasib or (B) sotorasib for 5 days and CellTiterGlo assays were performed. Drug-response curves for G12C allele in Figure 4C and 4D are shown as dotted line for reference. The curves are shown as mean  $\pm$  SEM from at least three independent experiments.

# Figure S18

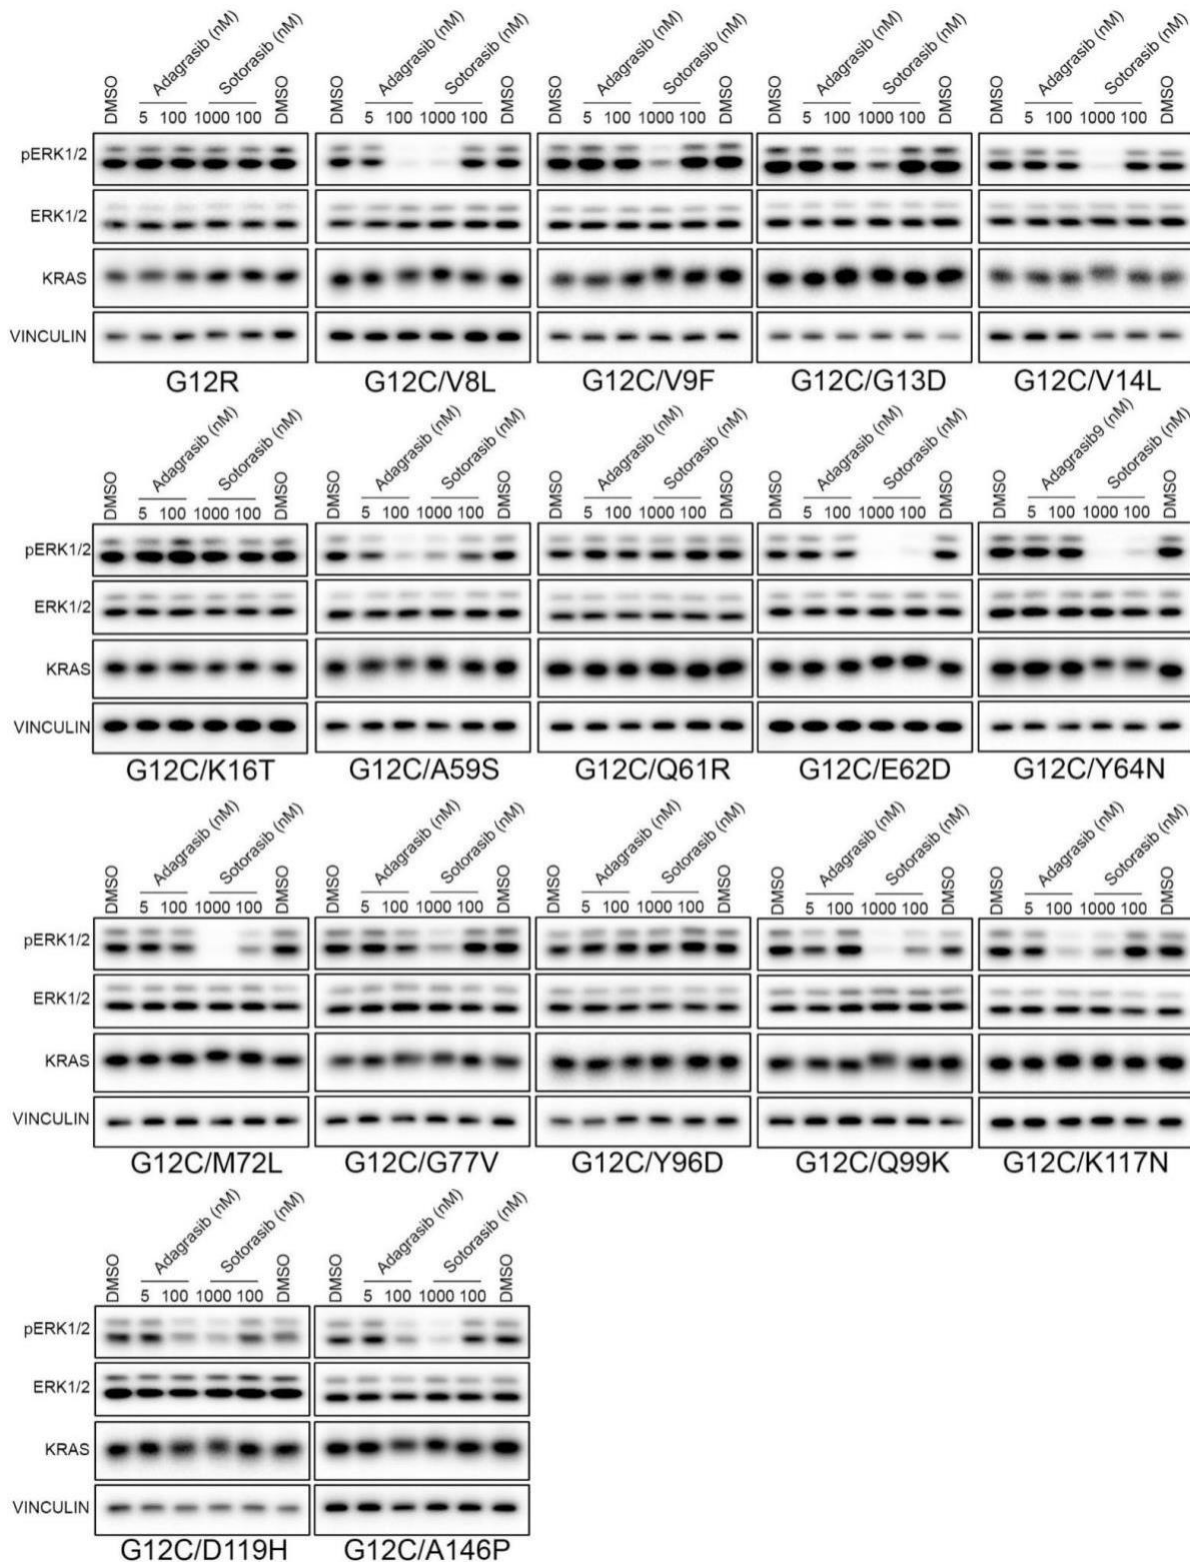

**Figure S18. Immunoblot results for G12C variants after 6-hour treatment with KRAS<sup>G12C</sup> inhibitors.** Ba/F3 cells expressing indicated variants were treated with adagrasib or sotorasib for 6 hours and immunoblots were performed to assess the ERK phosphorylation and total KRAS protein levels.



**Figure S19**

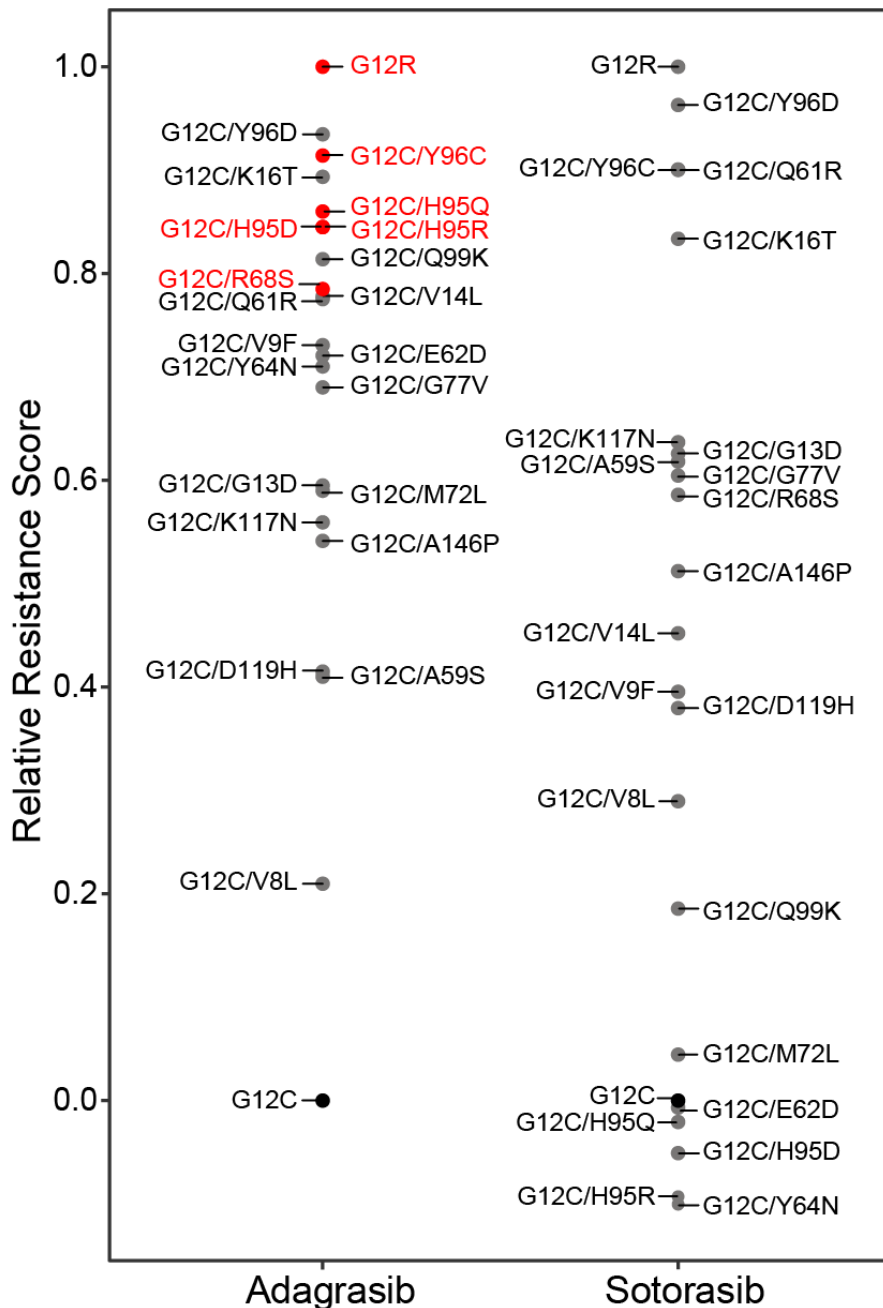

**Figure S19: Summary of validation of results from the deep mutational scanning screen.** A summary of the relative resistance scores is shown for each allele expressed in cells treated with adagrasib or sotorasib. Relative resistance score is defined as the fraction of resistance conferred by each allele, with maximal resistance defined by the differential sensitivity of the insensitive G12R allele (which does not covalently bind adagrasib or sotorasib) and the sensitive G12C allele (**Supplementary Methods, Table S6**). A higher relative resistance score suggests stronger resistance potential. The mutations colored in red were observed clinically in the patients described in the study.

**Table S1.** Summary of testing platforms and genomic/histologic findings among the 38 patients.

| Case                                                     | Tumor Type | Sequencing Platform at Baseline   | Sequencing Platform at Resistance             | Sample Available at Time of Resistance |       | Acquired KRAS alterations                            | Acquired RTK/MAPK/PI3K alterations                                   | Acquired fusions                                                   | Histologic transformation                         |
|----------------------------------------------------------|------------|-----------------------------------|-----------------------------------------------|----------------------------------------|-------|------------------------------------------------------|----------------------------------------------------------------------|--------------------------------------------------------------------|---------------------------------------------------|
|                                                          |            |                                   |                                               | Tissue                                 | ctDNA |                                                      |                                                                      |                                                                    |                                                   |
| <b>Cases where KRAS G12C was detected at resistance:</b> |            |                                   |                                               |                                        |       |                                                      |                                                                      |                                                                    |                                                   |
| 1                                                        | NSCLC      | DFCI OncoPanel                    | DFCI OncoPanel                                | Yes                                    | No    | Y96C                                                 | ---                                                                  | ---                                                                | No                                                |
| 2                                                        | CRC        | Henry Ford Illumina Assay         | Guardant360                                   | No                                     | Yes   | H95Q<br>H95R<br>Q61H<br>G13D<br>G12D<br>G12R<br>G12V | BRAF V600E<br>MAP2K1 K57N<br>MAP2K1 K57T<br>RIT1 P128L<br>PTEN G209V | CCDC6-RET                                                          | Not assessed                                      |
| 3                                                        | NSCLC      | FoundationOne Liquid CDx          | FoundationOne Liquid CDx                      | No                                     | Yes   | H95D<br>R68S<br>G12W<br>G12V                         | BRAF V600E                                                           | ---                                                                | Not assessed                                      |
| 4                                                        | CRC        | N/A                               | FoundationOne Liquid CDx                      | No                                     | Yes   | H95R<br>G12D                                         | MAP2K1 I99_K104del                                                   | ---                                                                | Not assessed                                      |
| 5                                                        | CRC        | Resolution Bioscience ctDx        | Resolution Bioscience ctDx;<br>Guardant Omni  | No                                     | Yes   | G12D<br>G13D                                         | MAP2K1 K57N<br>EGFR A289V                                            | EML4-ALK                                                           | Not assessed                                      |
| 6                                                        | CRC        | FoundationOne CDx                 | FoundationOne Liquid CDx                      | No                                     | Yes   | G13D                                                 | NRAS Q61K<br>MAP2K1 E102_I103del                                     | FGFR3-TACC<br>AKAP-BRAF<br>NRF1-BRAF<br>RAF1-CCDC176<br>RAF1-TRAK1 | Not assessed                                      |
| 7                                                        | NSCLC      | DFCI OncoPanel                    | DFCI OncoPanel;<br>Resolution Bioscience ctDx | Yes                                    | Yes   | KRAS G12C amplification                              | ---                                                                  | ---                                                                | No                                                |
| 8                                                        | CRC        | Resolution Bioscience ctDx        | Resolution Bioscience ctDx                    | No                                     | Yes   | KRAS G12C amplification                              | ---                                                                  | ---                                                                | Not assessed                                      |
| 9                                                        | NSCLC      | MSK-IMPACT                        | MSK-IMPACT                                    | Yes                                    | No    | ---                                                  | MET amplification                                                    | ---                                                                | No                                                |
| 10                                                       | NSCLC      | Guardant360                       | Guardant360                                   | No                                     | Yes   | ---                                                  | MET amplification                                                    | ---                                                                | Not assessed                                      |
| 11                                                       | NSCLC      | DFCI OncoPanel                    | DFCI OncoPanel,<br>Guardant360                | Yes                                    | Yes   | ---                                                  | ---                                                                  | ---                                                                | Yes,<br>adenocarcinoma to squamous cell carcinoma |
| 12                                                       | NSCLC      | MGH SNaPshot & Solid Fusion Assay | MGH SNaPshot & Solid Fusion Assay             | Yes                                    | No    | ---                                                  | ---                                                                  | ---                                                                | Yes,<br>adenocarcinoma to squamous cell carcinoma |
| 13                                                       | NSCLC      | Guardant360                       | Guardant360                                   | Yes                                    | Yes   | ---                                                  | MAP2K1 E102_103del                                                   | ---                                                                | No                                                |
| 14                                                       | CRC        | FoundationOne CDx                 | Tempus xT                                     | Yes                                    | No    | ---                                                  | PTEN N48K<br>PIK3R1 S361fs                                           | ---                                                                | No                                                |

|                                                              |             |                                 |                                           |     |     |      |               |     |              |
|--------------------------------------------------------------|-------------|---------------------------------|-------------------------------------------|-----|-----|------|---------------|-----|--------------|
| 15                                                           | NSCLC       | Resolution Bioscience ctDx      | Resolution Bioscience ctDx                | No  | Yes | ---  | RET M918T     | --- | Not assessed |
| 18                                                           | NSCLC       | Guardant360                     | Guardant360                               | No  | Yes | ---  | ---           | --- | Not assessed |
| 19                                                           | NSCLC       | Henry Ford Illumina Assay       | Henry Ford Illumina Assay                 | Yes | No  | ---  | ---           | --- | No           |
| 20                                                           | NSCLC       | Henry Ford Illumina Assay       | Guardant360                               | Yes | Yes | ---  | ---           | --- | No           |
| 21                                                           | NSCLC       | FoundationOne CDx               | Guardant360                               | No  | Yes | ---  | ---           | --- | Not assessed |
| 22                                                           | CRC         | FoundationOne CDx               | Guardant360                               | No  | Yes | ---  | ---           | --- | Not assessed |
| 23                                                           | NSCLC       | MSK-IMPACT                      | Resolution Bioscience ctDx; MSK-ACCESS    | No  | Yes | ---  | ---           | --- | Not assessed |
| 24                                                           | NSCLC       | MSK-IMPACT                      | MSK-ACCESS                                | No  | Yes | ---  | ---           | --- | Not assessed |
| 25                                                           | NSCLC       | MSK-IMPACT                      | MSK-IMPACT                                | Yes | No  | ---  | ---           | --- | No           |
| 26                                                           | CRC         | MSK-IMPACT                      | Resolution Bioscience ctDx; MSK-ACCESS    | No  | Yes | ---  | ---           | --- | Not assessed |
| 27                                                           | NSCLC       | FoundationOne Liquid CDx; Caris | FoundationOne Liquid CDx                  | No  | Yes | ---  | ---           | --- | Not assessed |
| 28                                                           | CRC         | Resolution Bioscience ctDx      | Resolution Bioscience ctDx                | No  | Yes | ---  | ---           | --- | Not assessed |
| 29                                                           | NSCLC       | Resolution Bioscience ctDx      | Resolution Bioscience ctDx                | No  | Yes | ---  | ---           | --- | Not assessed |
| 30                                                           | NSCLC       | Resolution Bioscience ctDx      | Resolution Bioscience ctDx                | No  | Yes | ---  | ---           | --- | Not assessed |
| 31                                                           | NSCLC       | Resolution Bioscience ctDx      | Resolution Bioscience ctDx                | No  | Yes | ---  | ---           | --- | Not assessed |
| 32                                                           | NSCLC       | Resolution Bioscience ctDx      | Resolution Bioscience ctDx                | No  | Yes | ---  | ---           | --- | Not assessed |
| 33                                                           | CRC         | Resolution Bioscience ctDx      | Resolution Bioscience ctDx                | No  | Yes | ---  | ---           | --- | Not assessed |
| 34                                                           | NSCLC       | Resolution Bioscience ctDx      | Resolution Bioscience ctDx                | No  | Yes | ---  | ---           | --- | Not assessed |
| <b>Cases where KRAS G12C was not detected at resistance:</b> |             |                                 |                                           |     |     |      |               |     |              |
| 35                                                           | NSCLC       | FoundationOne CDx               | Guardant360                               | No  | Yes | ---  | ---           | --- | Not assessed |
| 36                                                           | NSCLC       | N/A                             | Guardant360                               | No  | Yes | ---  | ---           | --- | Not assessed |
| 37                                                           | NSCLC       | Tempus xF                       | Tempus xF                                 | No  | Yes | ---  | ---           | --- | Not assessed |
| 38                                                           | NSCLC       | Guardant360                     | Guardant360                               | No  | Yes | ---  | ---           | --- | Not assessed |
| 16                                                           | NSCLC       | Resolution Bioscience ctDx      | Resolution Bioscience ctDx; Guardant Omni | No  | Yes | G12D | PIK3CA H1047R | --- | Not assessed |
| 17                                                           | Appendiceal | Guardant Omni                   | Guardant Omni                             | No  | Yes | ---  | NF1 R2637*    | --- | Not assessed |



**Table S2.** Detailed deep mutational scanning screen results.

| Mutation | Zscore MRTX1257 | Zscore Sotorasib | Zscore Control |
|----------|-----------------|------------------|----------------|
| T2A      | -0.30794        | -0.4119          | 0.3111         |
| T2C      | -0.50447        | 0.55517          | 0.3144         |
| T2D      | 0.29036         | 0.19821          | 1.13175        |
| T2E      | -0.0649         | -0.36654         | 0.81215        |
| T2F      | -0.10609        | 0.24591          | 0.6235         |
| T2G      | -0.22073        | -1.36377         | 0.35112        |
| T2H      | -0.00154        | 0.24266          | 0.56694        |
| T2I      | 0.33979         | 0.90523          | 1.16526        |
| T2K      | 0.16673         | 0.20068          | 0.42076        |
| T2L      | 0.80642         | -0.00737         | 1.09175        |
| T2M      | -0.63476        | -1.22401         | 1.08386        |
| T2N      | 0.05708         | 0.55071          | 0.87575        |
| T2P      | -0.81568        | -0.79592         | 0.68124        |
| T2Q      | 1.29472         | 0.33992          | 0.81743        |
| T2R      | -0.5614         | -0.43685         | -0.5659        |
| T2S      | -0.56012        | -0.63989         | 0.32776        |
| T2T      | NA              | NA               | NA             |
| T2V      | -0.55416        | -0.9905          | 0.32798        |
| T2W      | -0.79453        | -0.514           | 0.29287        |
| T2Y      | 0.99829         | 0.41731          | 0.79369        |
| T2X      | -1.97088        | -1.5186          | -1.2024        |
| E3A      | -0.53627        | 0.30844          | -0.89562       |
| E3C      | 0.01519         | 0.36292          | -0.12038       |
| E3D      | 1.37878         | -0.58135         | 0.08741        |
| E3E      | NA              | NA               | NA             |
| E3F      | -1.05065        | -0.29308         | -1.82259       |
| E3G      | -0.5574         | -0.14979         | -0.58067       |
| E3H      | -2.66134        | -0.86174         | -1.56069       |
| E3I      | -0.82172        | -1.17847         | -1.5229        |
| E3K      | -0.70223        | -0.42448         | -0.82711       |
| E3L      | -0.96699        | -0.82697         | -1.03792       |
| E3M      | -1.20053        | -0.67931         | -1.27731       |
| E3N      | -1.02206        | -0.97793         | -0.85835       |
| E3P      | -0.96792        | -0.42628         | -1.00876       |
| E3Q      | -0.6698         | 0.56509          | -1.05551       |
| E3R      | -0.98094        | -0.57334         | -1.1512        |
| E3S      | -0.85121        | -0.27776         | -0.5519        |
| E3T      | -0.59683        | 0.22229          | -0.6219        |
| E3V      | -0.93685        | -0.79198         | -0.78527       |
| E3W      | -0.54043        | -0.24773         | -1.64574       |
| E3Y      | -1.52118        | -0.55417         | -1.61016       |
| E3X      | 0.10468         | 0.39877          | -0.92907       |

|     |          |          |          |
|-----|----------|----------|----------|
| Y4A | -0.10764 | 0.12065  | 1.65401  |
| Y4C | 0.10354  | -0.27867 | 1.16724  |
| Y4D | 0.64938  | 0.57653  | 2.89117  |
| Y4E | 0.37647  | 0.07323  | 2.27502  |
| Y4F | 0.72348  | 0.36106  | 0.3944   |
| Y4G | 0.36085  | 0.56725  | 3.08293  |
| Y4H | 0.25106  | 0.64549  | 2.44675  |
| Y4I | -0.41987 | 0.31332  | 1.18671  |
| Y4K | 0.12645  | -0.21185 | 1.95468  |
| Y4L | 1.19976  | 1.5479   | 1.8475   |
| Y4M | -0.23007 | -0.44103 | 1.43413  |
| Y4N | 0.22125  | 0.44569  | 2.50929  |
| Y4P | 1.4645   | 1.31481  | 1.13723  |
| Y4Q | 0.4439   | -0.05387 | 2.18706  |
| Y4R | 2.60653  | 0.00342  | 1.86838  |
| Y4S | 1.31147  | 1.06168  | 2.08482  |
| Y4T | 0.27738  | 0.11668  | 2.35009  |
| Y4V | -0.23578 | -1.12782 | 1.32617  |
| Y4W | 0.59624  | 1.7315   | 1.77286  |
| Y4Y | NA       | NA       | NA       |
| Y4X | -0.05542 | 0.03733  | -0.39517 |
| K5A | -0.03941 | 0.05695  | 0.46289  |
| K5C | 1.00289  | -0.47226 | 1.10154  |
| K5D | -0.03508 | -0.08343 | 0.75159  |
| K5E | -0.61503 | -0.25879 | 0.58223  |
| K5F | 0.22751  | -0.30959 | 0.32951  |
| K5G | 0.65021  | -0.54674 | 0.86192  |
| K5H | -0.61488 | 0.13633  | 0.23525  |
| K5I | 0.03269  | -0.50534 | 1.76856  |
| K5K | NA       | NA       | NA       |
| K5L | -0.1211  | -0.68989 | 0.87364  |
| K5M | -0.14788 | -0.6312  | 0.45426  |
| K5N | 0.1716   | 0.27915  | 0.6099   |
| K5P | 0.95839  | 0.45376  | 0.9412   |
| K5Q | -0.02475 | 0.53189  | 0.37015  |
| K5R | -0.03903 | -0.22183 | -0.22538 |
| K5S | -0.47774 | -0.41374 | 0.31983  |
| K5T | -0.29414 | 0.90725  | 1.36754  |
| K5V | 0.25208  | -0.14105 | 1.54365  |
| K5W | -0.63891 | -0.11305 | -0.22516 |
| K5Y | -0.06319 | 0.7434   | -0.0228  |
| K5X | 0.34639  | -0.10448 | -0.70663 |
| L6A | 0.42586  | 0.58769  | 2.18447  |

|     |          |          |          |
|-----|----------|----------|----------|
| L6C | -0.87834 | -0.03271 | 0.92768  |
| L6D | 0.74818  | 0.3309   | -0.4481  |
| L6E | 0.54693  | 0.13978  | 0.44139  |
| L6F | 0.3684   | -0.36332 | 0.59972  |
| L6G | 0.67346  | 0.49078  | 1.74719  |
| L6H | 0.5132   | 0.66026  | 0.95439  |
| L6I | 0.10116  | 0.29815  | 0.58931  |
| L6K | -0.09347 | -0.16921 | -0.78716 |
| L6L | -0.27678 | 0.36792  | -0.02776 |
| L6M | -0.53261 | -0.5824  | -0.21808 |
| L6N | 0.97091  | 1.01822  | 0.3286   |
| L6P | 0.80782  | 1.17129  | 1.40849  |
| L6Q | -0.74413 | -0.12877 | -0.11654 |
| L6R | -0.06609 | -0.47829 | -0.61672 |
| L6S | -0.3513  | 0.03078  | 1.61118  |
| L6T | -0.19985 | -0.33321 | 1.41342  |
| L6V | -0.26096 | -0.96248 | 0.5257   |
| L6W | -0.28187 | 0.39396  | -0.18161 |
| L6Y | -0.22742 | 0.0292   | 1.03024  |
| L6X | -0.39423 | 0.50785  | -0.82441 |
| V7A | 0.03757  | -0.56949 | 2.89408  |
| V7C | 0.06503  | -0.34573 | 2.00831  |
| V7D | 0.19687  | 0.0874   | 0.65427  |
| V7E | 0.62067  | 0.4608   | 0.16064  |
| V7F | -0.29376 | -0.27052 | 0.10618  |
| V7G | 1.34397  | 0.75387  | 2.07814  |
| V7H | -0.91102 | -0.89839 | 1.2531   |
| V7I | -0.82334 | 0.12893  | -0.32589 |
| V7K | -0.88193 | -0.84458 | 1.07259  |
| V7L | -0.55506 | -0.39464 | -0.69973 |
| V7M | 0.16199  | -0.28478 | 1.23603  |
| V7N | -0.67224 | -0.83272 | 0.4219   |
| V7P | -0.78708 | -0.2728  | -0.40734 |
| V7Q | 0.42669  | 0.96983  | 1.29487  |
| V7R | -0.69341 | -0.93014 | 1.62558  |
| V7S | 0.43419  | 0.18109  | 2.19256  |
| V7T | -0.30317 | 0.71289  | 1.33069  |
| V7V | NA       | NA       | NA       |
| V7W | -0.62615 | -0.0124  | -1.8346  |
| V7Y | -0.86534 | -0.82161 | 0.148    |
| V7X | -0.43788 | -0.06423 | -0.73029 |
| V8A | 0.33521  | 0.86474  | 1.9007   |
| V8C | 0.03191  | 0.43557  | 1.97461  |

|      |          |          |          |
|------|----------|----------|----------|
| V8D  | 0.14123  | 1.07025  | 1.06619  |
| V8E  | 1.03204  | 2.39584  | 0.93987  |
| V8F  | 2.24057  | 2.81955  | 0.80602  |
| V8G  | -0.03049 | 0.70156  | 1.31838  |
| V8H  | 2.81539  | 5.3025   | 1.19486  |
| V8I  | 0.07267  | 0.56498  | 1.08848  |
| V8K  | 4.48745  | 5.49216  | 0.93241  |
| V8L  | 0.70927  | 3.08771  | 1.03712  |
| V8M  | 0.23241  | 1.63023  | 1.44448  |
| V8N  | 1.39241  | 2.39664  | 1.1502   |
| V8P  | 1.94502  | 1.35739  | 0.25656  |
| V8Q  | 1.25313  | 3.53615  | 1.12323  |
| V8R  | 0.27596  | 0.23572  | -0.89515 |
| V8S  | 1.93542  | 3.16217  | 1.7209   |
| V8T  | 1.6671   | 3.61392  | 1.61513  |
| V8V  | NA       | NA       | NA       |
| V8W  | 3.36883  | 5.00353  | 0.10316  |
| V8Y  | 4.51515  | 5.42902  | 0.72118  |
| V8X  | 0.44619  | 0.47711  | -0.66114 |
| V9A  | -0.38046 | -0.3492  | 0.70737  |
| V9C  | 0.32312  | 0.41242  | 0.95114  |
| V9D  | 1.0748   | 0.69651  | -0.04354 |
| V9E  | 1.10402  | 0.78753  | -0.84991 |
| V9F  | 2.62984  | 1.00013  | 0.27391  |
| V9G  | 2.08102  | 1.09735  | 0.88512  |
| V9H  | 3.63819  | 3.11909  | 1.33473  |
| V9I  | 0.19177  | -0.09012 | -0.53877 |
| V9K  | 3.39473  | 3.51342  | 0.17801  |
| V9L  | -0.69812 | -0.55885 | -0.96373 |
| V9M  | 0.66347  | 0.87143  | -0.54506 |
| V9N  | -0.33    | 0.0379   | 0.03301  |
| V9P  | -0.64593 | -0.35404 | 0.15575  |
| V9Q  | 2.96289  | 2.41618  | 0.6178   |
| V9R  | 3.23025  | 3.02915  | 0.24721  |
| V9S  | -0.34723 | -0.32036 | -0.15105 |
| V9T  | -0.08787 | 0.5043   | -0.12356 |
| V9V  | NA       | NA       | NA       |
| V9W  | 4.21605  | 4.5624   | 0.70094  |
| V9Y  | 2.49768  | 2.23599  | -0.17751 |
| V9X  | 0.54253  | -0.23932 | -1.71475 |
| G10A | 0.79238  | 0.14687  | -0.73914 |
| G10C | 0.45484  | -0.24228 | -1.13507 |
| G10D | -0.63757 | -0.60795 | -1.21413 |

|      |          |          |          |
|------|----------|----------|----------|
| G10E | -0.32051 | -0.54636 | -1.67136 |
| G10F | 0.30747  | -0.48918 | -1.65378 |
| G10G | NA       | NA       | NA       |
| G10H | 0.4574   | -0.41983 | -1.4873  |
| G10I | -0.96474 | -1.61003 | -1.43116 |
| G10K | 0.72788  | 1.18066  | -1.16687 |
| G10L | 1.02065  | -0.26857 | -1.65964 |
| G10M | -1.1552  | -1.26995 | -1.31191 |
| G10N | -0.11811 | 0.48587  | -1.97316 |
| G10P | -1.3494  | -1.21313 | -1.21873 |
| G10Q | 0.02335  | -0.28371 | -1.39887 |
| G10R | 0.29424  | 0.90097  | -1.42504 |
| G10S | -0.20769 | 0.54986  | -0.78016 |
| G10T | -0.48158 | -0.17903 | -1.19004 |
| G10V | -0.57484 | -0.49741 | -1.15311 |
| G10W | -0.70722 | -0.39613 | -1.84299 |
| G10Y | 0.64788  | 0.43018  | -1.51269 |
| G10X | -1.05819 | -1.07423 | -1.99427 |
| A11A | NA       | NA       | NA       |
| A11C | 0.13523  | -0.8076  | -0.94301 |
| A11D | 0.00622  | 1.12229  | -0.41281 |
| A11E | -0.65096 | 0.13702  | -0.32579 |
| A11F | -0.83289 | 0.21644  | -0.64382 |
| A11G | -0.07364 | -1.02479 | 0.47775  |
| A11H | 0.00405  | -0.72091 | -0.3465  |
| A11I | 4.90494  | -1.98839 | 1.42969  |
| A11K | 1.3026   | 2.62053  | 0.53069  |
| A11L | 1.16239  | 0.93652  | -1.06206 |
| A11M | -1.06778 | -1.16765 | -1.33828 |
| A11N | -0.15421 | 0.99765  | 0.20066  |
| A11P | -0.83932 | -0.65352 | -0.04886 |
| A11Q | -0.10512 | 0.26303  | -1.07668 |
| A11R | 1.41474  | 1.54931  | 0.19894  |
| A11S | -1.2214  | -1.89416 | -0.15306 |
| A11T | 0.53693  | 0.79816  | -0.91109 |
| A11V | 3.02403  | -0.76681 | 0.23989  |
| A11W | 1.09852  | 0.56101  | 0.36667  |
| A11Y | 0.11599  | -0.3864  | -0.92149 |
| A11X | -0.16806 | -0.88765 | -0.60299 |
| C12A | 1.28343  | 1.87729  | -0.60485 |
| C12C | NA       | NA       | NA       |
| C12D | 4.23448  | 4.7892   | 0.85756  |
| C12E | 3.78622  | 4.16407  | 0.35157  |

|      |          |          |          |
|------|----------|----------|----------|
| C12F | 4.10719  | 4.60501  | 0.64362  |
| C12G | 0.51712  | -0.29855 | -0.96469 |
| C12H | 5.15009  | 5.77734  | 1.28756  |
| C12I | 5.64539  | 6.35227  | 2.05373  |
| C12K | 5.11718  | 6.07943  | 1.32479  |
| C12L | 5.34901  | 6.16885  | 1.69334  |
| C12M | 5.07075  | 5.62338  | 1.39419  |
| C12N | 4.20393  | 4.60777  | 0.54759  |
| C12P | -0.06489 | -0.45688 | -1.1015  |
| C12Q | 5.48242  | 6.33159  | 2.1528   |
| C12R | 5.34249  | 6.06084  | 1.32865  |
| C12S | 0.66344  | 1.02028  | -0.90762 |
| C12T | 2.39851  | 2.79957  | -0.60727 |
| C12V | 3.44017  | 3.69739  | 0.04068  |
| C12W | 3.99963  | 4.64992  | 0.72788  |
| C12Y | 4.30468  | 4.77757  | 0.63139  |
| C12X | 0.2495   | -0.18296 | -0.89116 |
| G13A | -0.47194 | -0.85173 | 0.37341  |
| G13C | -1.07778 | -0.67183 | -1.40087 |
| G13D | 3.0562   | 4.65388  | 2.05791  |
| G13E | 1.50383  | 2.40261  | 1.85306  |
| G13F | -0.06586 | 0.94726  | 1.29803  |
| G13G | NA       | NA       | NA       |
| G13H | 1.35489  | 1.44456  | 1.52964  |
| G13I | -0.22604 | -0.35836 | 0.59923  |
| G13K | 1.85221  | 2.13082  | -0.7246  |
| G13L | 0.77175  | 1.28661  | 0.99951  |
| G13M | -0.48447 | -0.88374 | 0.61894  |
| G13N | 0.75275  | 0.10574  | 1.67297  |
| G13P | 5.2401   | 6.23707  | 1.66509  |
| G13Q | 1.55091  | 0.71847  | 1.54001  |
| G13R | 0.16842  | -0.39635 | -0.37212 |
| G13S | -0.81868 | -0.12513 | -0.70509 |
| G13T | -0.71994 | -0.17424 | -0.70476 |
| G13V | 0.07843  | 0.54313  | 0.76301  |
| G13W | 0.3883   | -0.00277 | 1.23153  |
| G13Y | 0.5826   | 0.75028  | 1.15323  |
| G13X | 0.22855  | -0.25534 | -1.39249 |
| V14A | -0.52629 | -0.1519  | 1.08187  |
| V14C | -0.97814 | -0.36561 | 1.65298  |
| V14D | -0.72471 | 0.53205  | 0.76299  |
| V14E | -0.26415 | -0.14951 | 0.6712   |
| V14F | -0.47856 | -0.14662 | -0.96657 |

|      |          |          |          |
|------|----------|----------|----------|
| V14G | 1.57138  | -0.10385 | 1.6602   |
| V14H | 4.95217  | 4.88681  | 1.77258  |
| V14I | 0.9262   | 1.43637  | 1.64258  |
| V14K | 0.27392  | -0.60766 | -1.5516  |
| V14L | 4.54913  | 2.09299  | 1.17405  |
| V14M | -1.74936 | -1.7552  | -1.25043 |
| V14N | -0.66363 | -0.06099 | 1.75691  |
| V14P | 2.87084  | 2.87714  | 0.77571  |
| V14Q | -0.71725 | -0.98351 | 0.93654  |
| V14R | 1.19666  | 1.20741  | -0.78531 |
| V14S | -1.51082 | -1.5341  | 1.81914  |
| V14T | 0.49325  | 0.22542  | 1.85188  |
| V14V | NA       | NA       | NA       |
| V14W | 0.31506  | 0.36835  | -1.10985 |
| V14Y | -0.09483 | -0.89871 | -0.59409 |
| V14X | -0.01019 | 0.27859  | -0.33722 |
| G15A | -0.71627 | -1.96742 | -1.43078 |
| G15C | -0.13673 | -0.0531  | -1.34069 |
| G15D | -1.33071 | -1.36578 | -1.90497 |
| G15E | -0.88791 | -0.88991 | -1.52671 |
| G15F | -0.67912 | -0.8235  | -1.65711 |
| G15G | NA       | NA       | NA       |
| G15H | -0.427   | -0.15218 | -1.28573 |
| G15I | -0.56447 | -1.05889 | -1.5216  |
| G15K | -0.29264 | -0.55302 | -1.33708 |
| G15L | -0.36946 | 0.35267  | -1.02294 |
| G15M | -0.54194 | 0.11945  | -0.97815 |
| G15N | -0.58701 | -0.59026 | -1.34546 |
| G15P | -0.36924 | -0.61944 | -1.32024 |
| G15Q | -0.31027 | -0.39773 | -1.02539 |
| G15R | -0.13649 | -0.50312 | -0.78117 |
| G15S | 1.38451  | -0.32895 | -1.19064 |
| G15T | -0.28757 | -0.59992 | -0.8195  |
| G15V | -0.41477 | -0.48824 | -1.03326 |
| G15W | 0.20677  | -0.81365 | -0.93811 |
| G15Y | -0.80882 | -0.81153 | -1.37821 |
| G15X | -0.34785 | -0.51665 | -0.80975 |
| K16A | 0.36835  | 0.81426  | -1.39014 |
| K16C | 4.60613  | 4.55506  | 0.90859  |
| K16D | -0.26791 | -0.92754 | -1.62152 |
| K16E | -0.54737 | -0.77926 | -1.19759 |
| K16F | -0.37399 | -1.0302  | -1.16568 |
| K16G | -0.63177 | 0.4011   | -1.17365 |

|      |          |          |          |
|------|----------|----------|----------|
| K16H | -0.00245 | -1.93314 | -1.49367 |
| K16I | -0.34619 | -1.25834 | -1.70192 |
| K16K | NA       | NA       | NA       |
| K16L | 0.76696  | 0.25158  | -1.1002  |
| K16M | 0.41255  | 0.33421  | -0.59524 |
| K16N | -1.19921 | -0.29568 | -0.84423 |
| K16P | 0.11387  | 0.57447  | -0.7329  |
| K16Q | -0.41535 | -0.66013 | -1.06697 |
| K16R | -0.53565 | 0.03557  | -1.49667 |
| K16S | 5.44312  | 6.10078  | 1.56222  |
| K16T | 3.42174  | 3.64911  | 0.70844  |
| K16V | -0.20547 | -1.58092 | -1.57533 |
| K16W | -0.11184 | -0.48906 | -0.70787 |
| K16Y | -0.98801 | -0.28388 | -1.2048  |
| K16X | 0.14261  | -0.66025 | -0.49066 |
| S17A | -0.66657 | 0.01059  | -1.5191  |
| S17C | 0.46854  | -0.03543 | -0.57007 |
| S17D | -0.24981 | -1.18635 | -1.40367 |
| S17E | -0.61277 | 0.0114   | -1.14862 |
| S17F | -0.38544 | -0.31921 | -1.27825 |
| S17G | -0.59167 | -1.0806  | -2.12697 |
| S17H | 0.23212  | -0.06637 | -1.14113 |
| S17I | 0.67241  | -0.09256 | -0.85027 |
| S17K | -0.1787  | -2.1589  | -1.96229 |
| S17L | -0.91109 | -0.5716  | -1.70749 |
| S17M | 0.11713  | 0.05025  | -1.37816 |
| S17N | -0.18682 | -0.69371 | -1.5603  |
| S17P | -0.90949 | -1.01885 | -1.03501 |
| S17Q | -0.45715 | -0.67766 | -2.2196  |
| S17R | -1.26276 | -1.76068 | -2.24862 |
| S17S | -0.17911 | -0.53261 | 0.27992  |
| S17T | -0.34641 | 0.04205  | 0.02884  |
| S17V | -1.20933 | -0.684   | -1.21117 |
| S17W | 0.49332  | 0.52605  | -1.51307 |
| S17Y | 0.17825  | -0.02072 | -1.04763 |
| S17X | -0.41559 | -0.47657 | -0.62231 |
| A18A | NA       | NA       | NA       |
| A18C | -0.67418 | -0.7504  | -0.53266 |
| A18D | 0.48708  | 0.42625  | 1.05469  |
| A18E | 0.2675   | -2.81794 | -0.33979 |
| A18F | -0.49466 | -0.43505 | -1.43236 |
| A18G | -0.40266 | 0.72059  | 2.13232  |
| A18H | -0.4046  | -0.33669 | -1.19324 |



|      |          |          |          |
|------|----------|----------|----------|
| A18I | -0.78224 | 0.41999  | 1.71495  |
| A18K | -0.25972 | -1.17643 | -0.95107 |
| A18L | -0.90806 | -0.79205 | -1.3782  |
| A18M | -0.82525 | -1.12248 | 2.25047  |
| A18N | -0.04451 | -0.42406 | -0.3955  |
| A18P | -1.09332 | -2.37557 | -2.82965 |
| A18Q | 0.73153  | 1.04305  | 2.84662  |
| A18R | -0.98643 | -1.46204 | -2.78523 |
| A18S | -1.88199 | -0.59216 | -1.33127 |
| A18T | -1.63224 | -0.17728 | 0.35657  |
| A18V | 0.14656  | -0.46644 | 1.46921  |
| A18W | -0.65773 | -0.4577  | -0.08799 |
| A18Y | -1.63046 | -1.78574 | -1.32022 |
| A18X | -1.33375 | -1.68939 | -1.34404 |
| L19A | 1.05261  | 0.94149  | 0.53467  |
| L19C | -0.89543 | -1.32857 | -0.37417 |
| L19D | 0.36804  | -0.72611 | -0.38298 |
| L19E | 0.00835  | -0.2494  | 0.24076  |
| L19F | 0.88814  | 0.89455  | 0.35729  |
| L19G | -0.5379  | -1.29787 | 1.13032  |
| L19H | -0.16584 | -1.14484 | 1.0699   |
| L19I | -0.64509 | 0.84254  | -0.64071 |
| L19K | -0.96712 | -0.6356  | 0.40609  |
| L19L | -0.30513 | -0.45966 | -0.33663 |
| L19M | -0.14717 | 0.36728  | 0.29176  |
| L19N | -1.4025  | -1.21839 | 1.09315  |
| L19P | -0.25993 | -0.69253 | -1.16043 |
| L19Q | 2.21549  | -0.0492  | 1.44248  |
| L19R | -0.0166  | -0.7132  | -1.00449 |
| L19S | -1.00798 | 0.34394  | -0.68761 |
| L19T | -1.12539 | -0.7149  | -1.06709 |
| L19V | -0.67519 | -0.88414 | 0.06887  |
| L19W | 0.41164  | 1.00537  | 0.53723  |
| L19Y | 0.65353  | -0.0321  | 0.87298  |
| L19X | -0.21876 | -0.03679 | -0.52589 |
| T20A | 0.97599  | -0.43342 | 0.69619  |
| T20C | -0.91982 | -0.6033  | -1.66266 |
| T20D | 1.21658  | 3.24719  | 0.12713  |
| T20E | 0.67803  | 0.81959  | -0.37436 |
| T20F | 0.3725   | 0.03481  | 0.10705  |
| T20G | -1.30281 | 0.39569  | -0.20387 |
| T20H | 0.70043  | 0.2045   | -1.08596 |
| T20I | -0.35391 | -0.30683 | -0.72859 |

|      |          |          |          |
|------|----------|----------|----------|
| T20K | 0.76447  | -0.79078 | -1.16916 |
| T20L | -0.30781 | -0.46924 | -0.38182 |
| T20M | 0.64857  | -0.0853  | 0.23182  |
| T20N | 0.4608   | 1.04277  | 0.67675  |
| T20P | 0.52615  | 0.49716  | -0.52923 |
| T20Q | 0.39431  | 0.79285  | -0.54688 |
| T20R | -0.29788 | -1.97732 | -1.18744 |
| T20S | -0.15965 | 0.19364  | 0.72761  |
| T20T | NA       | NA       | NA       |
| T20V | -0.57483 | 0.07849  | -0.69016 |
| T20W | 0.47277  | -0.82105 | -1.05743 |
| T20Y | -0.68758 | -2.40995 | -1.01191 |
| T20X | -0.88158 | -0.7847  | -0.77713 |
| I21A | -0.74703 | -0.09618 | 0.42482  |
| I21C | 1.21547  | 0.04388  | 0.92398  |
| I21D | -0.14362 | -0.23061 | -0.03827 |
| I21E | -0.57327 | -0.34327 | 0.31736  |
| I21F | -0.5757  | 1.03807  | -1.11907 |
| I21G | -0.67987 | -0.42782 | -0.06577 |
| I21H | 2.45981  | 0.05603  | -0.34569 |
| I21I | NA       | NA       | NA       |
| I21K | 0.47255  | 0.15625  | 0.17927  |
| I21L | -1.86201 | -1.40951 | 0.01958  |
| I21M | 1.00229  | 0.95171  | 0.17065  |
| I21N | 0.99424  | 1.24591  | 0.61757  |
| I21P | -0.58417 | -0.9993  | -1.33846 |
| I21Q | -0.56261 | -1.51426 | -0.23198 |
| I21R | -0.37787 | -0.05979 | -1.83017 |
| I21S | 0.13243  | -0.93467 | 0.0487   |
| I21T | 0.16217  | -0.80509 | 0.20802  |
| I21V | -0.45577 | -0.72866 | 0.36756  |
| I21W | -0.0679  | 0.61195  | 0.14925  |
| I21Y | -1.13135 | -1.82136 | -0.4313  |
| I21X | 0.96093  | -0.15362 | -0.85058 |
| Q22A | 0.45781  | 0.08674  | 2.14929  |
| Q22C | -1.17573 | -0.58833 | 0.88371  |
| Q22D | -0.629   | 0.38991  | 1.86719  |
| Q22E | 0.68188  | -0.71798 | 1.77466  |
| Q22F | -0.45311 | -0.35726 | 1.22616  |
| Q22G | 0.68303  | -1.38953 | 1.36418  |
| Q22H | 0.00826  | 0.35087  | 0.33274  |
| Q22I | -1.66474 | 0.18652  | 0.5199   |
| Q22K | -0.31478 | -0.80635 | -1.25104 |

|      |          |          |          |
|------|----------|----------|----------|
| Q22L | -1.83971 | -1.38182 | 0.2796   |
| Q22M | -0.36632 | -0.68107 | -1.07476 |
| Q22N | -0.28883 | -1.59635 | 2.00814  |
| Q22P | -0.00584 | -0.12576 | -1.49398 |
| Q22Q | NA       | NA       | NA       |
| Q22R | -1.28001 | -1.26513 | -1.59105 |
| Q22S | 0.81562  | -0.82949 | 1.84393  |
| Q22T | 0.51194  | 0.68237  | 1.56974  |
| Q22V | -0.18576 | -0.30162 | 0.20672  |
| Q22W | -0.7177  | -1.57203 | 1.44741  |
| Q22Y | -0.99406 | -1.12792 | 0.74256  |
| Q22X | -0.58825 | 0.34857  | -0.88442 |
| L23A | 1.90313  | -0.86633 | 2.15653  |
| L23C | -0.54143 | -0.98833 | 2.15394  |
| L23D | -0.12192 | -0.91489 | 0.66903  |
| L23E | -1.15522 | -0.60021 | 2.23936  |
| L23F | -1.76991 | -0.20563 | -0.031   |
| L23G | -0.16064 | -1.03135 | 1.31922  |
| L23H | -0.34783 | 0.25338  | 2.29522  |
| L23I | -0.40771 | -0.54116 | 0.86295  |
| L23K | 0.09887  | -0.27599 | 3.22615  |
| L23L | -1.28197 | -1.35516 | -0.31041 |
| L23M | 0.28279  | -0.08139 | 0.50524  |
| L23N | 2.72377  | 0.49965  | 2.55581  |
| L23P | -1.60378 | -0.5862  | -0.94344 |
| L23Q | -0.2399  | 0.146    | 1.95575  |
| L23R | 1.061    | 0.75343  | 3.2171   |
| L23S | 0.34777  | -0.68275 | 2.18834  |
| L23T | 0.16298  | -0.07404 | 1.89425  |
| L23V | -0.39199 | -0.44878 | 1.19175  |
| L23W | -0.46003 | -0.12383 | -0.8403  |
| L23Y | -0.16476 | 0.20173  | -0.3394  |
| L23X | 0.31234  | -0.32064 | -1.19634 |
| I24A | NA       | NA       | NA       |
| I24C | -0.28185 | 0.15382  | 0.19342  |
| I24D | 0.64623  | -0.11697 | 0.82081  |
| I24E | -0.24785 | -0.25829 | 0.4398   |
| I24F | 1.97877  | 0.30148  | 4.80254  |
| I24G | -0.6052  | -0.06397 | 1.78145  |
| I24H | 0.70341  | 0.98328  | 2.50513  |
| I24I | NA       | NA       | NA       |
| I24K | -0.45498 | -0.54777 | 0.96813  |
| I24L | -0.52438 | 0.57804  | 2.81246  |

|      |          |          |          |
|------|----------|----------|----------|
| I24M | 0.41993  | 0.42698  | 1.77708  |
| I24N | 0.44914  | -0.43015 | 0.17634  |
| I24P | 0.18145  | 0.26436  | -1.1936  |
| I24Q | 0.6237   | -0.6945  | 2.48512  |
| I24R | -1.31237 | -0.65797 | 0.559    |
| I24S | -0.16842 | -0.63108 | 0.56472  |
| I24T | -0.74084 | -0.55692 | 0.15161  |
| I24V | -1.2492  | -1.56947 | -0.07576 |
| I24W | 1.64151  | 1.17057  | 3.64556  |
| I24Y | 1.51709  | 0.97405  | 3.82765  |
| I24X | -0.22201 | -0.39555 | -0.56401 |
| Q25A | 0.34509  | 0.04403  | 0.75184  |
| Q25C | 0.62874  | -0.08621 | 1.28152  |
| Q25D | -0.014   | -0.20313 | -0.2939  |
| Q25E | -0.16802 | 0.02027  | -0.91042 |
| Q25F | 1.1844   | 0.83853  | 1.7961   |
| Q25G | -0.29459 | 0.07244  | 1.5704   |
| Q25H | 1.68558  | 0.52184  | 1.13347  |
| Q25I | 0.13622  | 0.9242   | 0.96268  |
| Q25K | 0.02241  | 0.13423  | 1.15235  |
| Q25L | 1.0182   | -0.21986 | 1.46745  |
| Q25M | 0.52603  | -0.38509 | 1.56259  |
| Q25N | -0.65616 | -0.13895 | -0.52604 |
| Q25P | -0.59978 | -1.1391  | -1.00913 |
| Q25Q | NA       | NA       | NA       |
| Q25R | -0.05353 | -0.68858 | 0.16675  |
| Q25S | 0.69958  | 1.78735  | 0.15589  |
| Q25T | 0.90736  | -0.5953  | 1.31578  |
| Q25V | 0.37635  | -0.52187 | 2.00022  |
| Q25W | 0.76854  | 0.15898  | 1.55665  |
| Q25Y | 1.01298  | 0.66387  | 1.68337  |
| Q25X | -0.48404 | -0.66863 | -0.8735  |
| N26A | -0.80078 | -0.49657 | -0.8223  |
| N26C | -0.77379 | -0.59963 | -0.4025  |
| N26D | -0.11922 | 0.07382  | -0.34786 |
| N26E | 0.11935  | -0.35578 | 0.43794  |
| N26F | -0.55114 | 0.21165  | 0.21902  |
| N26G | -2.33201 | -1.17125 | -0.87968 |
| N26H | 0.22786  | 0.21354  | -1.4061  |
| N26I | -0.14417 | -0.76557 | 1.05183  |
| N26K | -0.63185 | 0.38571  | -1.5492  |
| N26L | 0.39092  | -0.66774 | 1.04844  |
| N26M | 0.51988  | 0.77691  | 1.57161  |

|      |          |          |          |
|------|----------|----------|----------|
| N26N | NA       | NA       | NA       |
| N26P | -0.42149 | -1.06422 | 0.59021  |
| N26Q | -1.37337 | -0.14059 | 0.1722   |
| N26R | -1.44328 | 0.14381  | -2.84436 |
| N26S | -0.21992 | -0.16706 | 0.27035  |
| N26T | -0.61678 | -0.89375 | 1.63762  |
| N26V | -0.73562 | -0.30136 | 0.92413  |
| N26W | 0.53558  | 0.3729   | -0.8712  |
| N26Y | 0.34876  | 1.32975  | -0.29575 |
| N26X | -0.27276 | -1.36672 | -1.00267 |
| H27A | -0.98674 | -1.52792 | -0.45853 |
| H27C | -1.12207 | -0.89851 | -0.78255 |
| H27D | -0.17375 | -0.90012 | -0.26617 |
| H27E | -1.35848 | -1.11204 | -2.29439 |
| H27F | -0.95977 | -0.27871 | 0.3418   |
| H27G | 0.0305   | -0.5637  | 2.88532  |
| H27H | NA       | NA       | NA       |
| H27I | -0.47343 | -0.64048 | -1.86697 |
| H27K | 0.38997  | -0.25658 | 0.8297   |
| H27L | -1.10374 | -0.6123  | -1.34218 |
| H27M | -0.88541 | -0.41414 | -0.86044 |
| H27N | -0.27144 | -0.14104 | 1.27434  |
| H27P | -0.22962 | -1.24657 | -0.88095 |
| H27Q | 1.92585  | 0.1977   | 0.19551  |
| H27R | -0.46777 | -0.52538 | -0.41068 |
| H27S | -0.11698 | -0.62347 | -0.47911 |
| H27T | -1.79482 | -0.38355 | -0.6719  |
| H27V | -0.92078 | -1.09481 | -1.07367 |
| H27W | 0.39032  | 0.4617   | 1.71857  |
| H27Y | -0.60869 | -0.49548 | 0.43845  |
| H27X | -0.5898  | -1.57693 | -0.49706 |
| F28A | -0.24306 | -0.92524 | -0.02256 |
| F28C | 0.12621  | -1.08956 | 1.30586  |
| F28D | -0.30104 | -0.45591 | -0.61024 |
| F28E | -0.65644 | -1.1585  | -0.8985  |
| F28F | NA       | NA       | NA       |
| F28G | -0.00393 | -0.25768 | -0.63833 |
| F28H | -0.01491 | -0.83724 | 1.14358  |
| F28I | -0.2903  | -0.72613 | 0.50321  |
| F28K | -0.68777 | -1.76001 | -1.05904 |
| F28L | -1.58459 | -1.16243 | 0.52616  |
| F28M | -1.07042 | -0.36898 | 2.76403  |
| F28N | -0.26055 | -0.71829 | -0.93631 |

|      |          |          |          |
|------|----------|----------|----------|
| F28P | -0.19701 | 0.06827  | -0.6696  |
| F28Q | -1.06531 | -1.1461  | -0.42998 |
| F28R | -0.39467 | 0.44285  | 0.35538  |
| F28S | 0.08792  | -0.7099  | -0.65135 |
| F28T | -0.49925 | -1.5736  | 0.0985   |
| F28V | 0.50396  | -0.39244 | 0.68334  |
| F28W | -0.01355 | -0.90477 | 1.85981  |
| F28Y | -1.06206 | -1.31602 | 1.10568  |
| F28X | 0.3821   | -0.12094 | -0.63791 |
| V29A | -0.89112 | -1.15542 | -0.11194 |
| V29C | -3.14861 | -3.04871 | 0.20681  |
| V29D | -0.38966 | -0.76659 | 1.67719  |
| V29E | -0.79775 | -0.48841 | 0.02559  |
| V29F | -1.99905 | -0.90623 | -1.98489 |
| V29G | 0.23924  | 0.05727  | 1.09239  |
| V29H | -0.84064 | -0.15371 | -0.17148 |
| V29I | -1.01324 | -1.51901 | 0.20824  |
| V29K | 0.01691  | -1.07542 | -0.20004 |
| V29L | -0.74644 | -0.035   | -1.54145 |
| V29M | -0.16667 | -0.60467 | -0.10557 |
| V29N | -0.79818 | -0.01212 | 0.08188  |
| V29P | -1.35442 | -0.75864 | 0.69774  |
| V29Q | -0.24415 | -0.18602 | 0.32986  |
| V29R | -0.35317 | -1.02314 | -0.51454 |
| V29S | -1.30241 | -0.80991 | 1.05511  |
| V29T | 0.01848  | -0.61496 | 1.36234  |
| V29V | NA       | NA       | NA       |
| V29W | -1.19647 | -1.33456 | -1.83359 |
| V29Y | -1.06203 | -1.24328 | -1.18894 |
| V29X | 0.07833  | -0.44526 | -0.44822 |
| D30A | 1.64828  | -1.17076 | -0.72822 |
| D30C | -0.52818 | -0.77799 | 0.1583   |
| D30D | NA       | NA       | NA       |
| D30E | -0.27755 | -0.10461 | -0.11699 |
| D30F | -0.5853  | -2.18289 | 0.78149  |
| D30G | -0.06221 | -0.82957 | -0.4095  |
| D30H | -0.64065 | -0.37569 | -0.00853 |
| D30I | -0.10165 | 0.03075  | 0.35013  |
| D30K | -0.66859 | -0.97492 | 0.71235  |
| D30L | -1.14785 | -0.54635 | 0.74081  |
| D30M | 0.65043  | 1.21816  | 0.52652  |
| D30N | -1.21324 | -1.91131 | 0.2767   |
| D30P | -0.33403 | 0.12921  | -1.0702  |

|      |          |          |          |
|------|----------|----------|----------|
| D30Q | -0.70579 | -0.57569 | -0.37029 |
| D30R | 0.19094  | -0.04376 | 0.46321  |
| D30S | -0.97554 | -0.93946 | -0.76705 |
| D30T | -0.87375 | -1.83422 | 0.68353  |
| D30V | -0.19807 | -0.42499 | 0.29169  |
| D30W | -1.26418 | -1.59232 | 0.15153  |
| D30Y | -0.05842 | -0.5675  | 0.5099   |
| D30X | -0.21115 | -0.7105  | -1.20569 |
| E31A | -1.34654 | -1.23353 | -1.16586 |
| E31C | -0.62278 | -0.15959 | -1.00793 |
| E31D | -0.17135 | -0.19332 | -0.45794 |
| E31E | NA       | NA       | NA       |
| E31F | -1.53407 | -1.20421 | -2.00189 |
| E31G | 1.05018  | -0.67964 | -0.8374  |
| E31H | -0.42249 | -0.89135 | -0.88582 |
| E31I | -0.94712 | -0.31652 | -1.05109 |
| E31K | -0.56209 | -0.46728 | -1.53432 |
| E31L | -0.57327 | -2.00439 | -1.49753 |
| E31M | 0.0278   | 0.32476  | -1.1793  |
| E31N | -0.39713 | -0.29035 | -0.82391 |
| E31P | -1.31471 | -1.67138 | -0.13984 |
| E31Q | 0.08001  | -0.15036 | -0.742   |
| E31R | -1.2966  | -1.52611 | -1.37098 |
| E31S | -1.08743 | -1.91914 | -1.24763 |
| E31T | -0.72635 | -1.13333 | -0.46441 |
| E31V | -1.67605 | -0.88376 | -0.87587 |
| E31W | -1.06336 | -0.5489  | -1.61185 |
| E31Y | -0.41897 | -0.17648 | -1.66202 |
| E31X | 0.18454  | -0.37164 | -0.61288 |
| Y32A | -0.26641 | -0.15357 | -1.90992 |
| Y32C | 0.09441  | 0.18201  | -2.54758 |
| Y32D | 0.31152  | -0.76896 | -0.23858 |
| Y32E | 0.10734  | 0.44677  | 0.06235  |
| Y32F | -0.82985 | -0.64336 | -2.54931 |
| Y32G | -0.88438 | -1.15097 | -2.11088 |
| Y32H | -0.5299  | -0.96684 | -1.89868 |
| Y32I | -0.25102 | -0.15361 | -1.94595 |
| Y32K | -0.49195 | -0.98261 | -3.02054 |
| Y32L | -0.89096 | -0.71605 | -2.66472 |
| Y32M | NA       | NA       | NA       |
| Y32N | -0.90306 | -0.56721 | -2.10345 |
| Y32P | -0.44292 | -0.90562 | -2.57592 |
| Y32Q | -0.89684 | -0.91713 | -2.20403 |

|      |          |          |          |
|------|----------|----------|----------|
| Y32R | -0.96205 | -1.44147 | -2.87991 |
| Y32S | -1.46094 | -1.07057 | -2.28002 |
| Y32T | -1.20385 | -0.4863  | -2.20699 |
| Y32V | -0.36655 | -0.25458 | -3.47481 |
| Y32W | NA       | NA       | NA       |
| Y32Y | NA       | NA       | NA       |
| Y32X | 0.02289  | 0.17748  | -0.72624 |
| D33A | -0.89236 | -1.34781 | -2.2007  |
| D33C | -2.02939 | -1.72458 | -1.37972 |
| D33D | NA       | NA       | NA       |
| D33E | 0.0464   | 0.15465  | 0.99938  |
| D33F | -1.2636  | -0.90708 | -0.73466 |
| D33G | -0.60491 | -1.06434 | -2.90314 |
| D33H | -0.60492 | -0.50553 | -0.56383 |
| D33I | -0.43749 | -0.86398 | -0.79456 |
| D33K | -0.40938 | -0.56507 | -1.71309 |
| D33L | -1.1838  | -1.41797 | -1.088   |
| D33M | -0.67238 | -0.3928  | -0.54227 |
| D33N | -0.40786 | 0.39873  | -1.02159 |
| D33P | -0.60814 | -1.7564  | -3.67057 |
| D33Q | -1.38897 | -0.25681 | -0.764   |
| D33R | -0.94119 | -1.25894 | -1.38741 |
| D33S | -1.59538 | -0.84566 | -1.54446 |
| D33T | -0.26578 | -0.55672 | -2.09068 |
| D33V | -0.06964 | 0.6493   | -0.85324 |
| D33W | -0.62556 | -0.2135  | -0.69639 |
| D33Y | -0.40021 | 0.10782  | -0.87659 |
| D33X | -0.35435 | -0.82796 | -0.84421 |
| P34A | -1.43596 | -1.18928 | 0.16118  |
| P34C | -1.85325 | -1.84343 | -1.55976 |
| P34D | -0.90429 | -0.57803 | -2.10466 |
| P34E | -0.69231 | -0.8266  | -0.88882 |
| P34F | -0.66141 | -0.72666 | -2.34934 |
| P34G | -0.56708 | -1.35374 | -2.55252 |
| P34H | -1.13087 | -4.48162 | -2.61396 |
| P34I | -2.00689 | -1.45194 | -2.73703 |
| P34K | -1.39371 | -2.71184 | -2.56994 |
| P34L | -1.22176 | -0.66452 | -2.06238 |
| P34M | -1.27825 | -2.06152 | -1.23512 |
| P34N | -0.72041 | 0.49397  | -2.29869 |
| P34P | NA       | NA       | NA       |
| P34Q | -0.1908  | -0.43107 | -1.46952 |
| P34R | -1.2634  | -0.92606 | -1.75008 |



|      |          |          |          |
|------|----------|----------|----------|
| P34S | -1.20818 | -0.67851 | -1.67374 |
| P34T | -1.61982 | -1.48325 | -1.10003 |
| P34V | -0.0689  | -0.00404 | -1.92461 |
| P34W | -1.19678 | -0.76181 | -2.09263 |
| P34Y | 0.00195  | -0.55931 | -1.65021 |
| P34X | 0.44545  | 0.06238  | -0.86879 |
| T35A | -0.79627 | -0.73761 | -1.66548 |
| T35C | -0.47055 | -0.87036 | -0.80344 |
| T35D | -1.93351 | -1.40018 | -1.36103 |
| T35E | -0.82966 | -0.91858 | -1.77314 |
| T35F | -0.54987 | -1.65934 | -1.67356 |
| T35G | -1.06507 | -0.17981 | -1.84768 |
| T35H | 0.82596  | 1.1307   | -2.42218 |
| T35I | -0.65549 | -1.27074 | -1.54684 |
| T35K | -0.92606 | -1.28111 | -2.97202 |
| T35L | 0.12742  | 0.10461  | -2.33372 |
| T35M | -0.94107 | -0.56027 | -1.03518 |
| T35N | -0.34733 | -0.29153 | -1.36337 |
| T35P | -1.72901 | -1.2571  | -3.9112  |
| T35Q | -0.21315 | -0.92896 | -1.73241 |
| T35R | -0.91255 | -1.05367 | -2.03987 |
| T35S | 1.66167  | -0.31682 | -1.34142 |
| T35T | NA       | NA       | NA       |
| T35V | -1.0426  | -0.87884 | -1.59497 |
| T35W | -0.49468 | -0.3786  | -1.12732 |
| T35Y | -0.7054  | -1.04861 | -1.82412 |
| T35X | -0.93811 | -1.13295 | -0.789   |
| I36A | -0.43815 | -1.13451 | -2.51883 |
| I36C | -0.54587 | -0.17636 | -1.88575 |
| I36D | -0.42071 | 0.07593  | -1.76947 |
| I36E | -0.26271 | 0.22202  | -1.77611 |
| I36F | -0.87637 | -0.96017 | -2.00857 |
| I36G | -1.25274 | -0.81614 | -1.81946 |
| I36H | 0.57968  | 0.17582  | -2.08105 |
| I36I | NA       | NA       | NA       |
| I36K | -1.90478 | -0.84547 | -2.83418 |
| I36L | -2.04401 | -1.64065 | -1.589   |
| I36M | -0.45563 | -0.54872 | -0.49481 |
| I36N | -0.1131  | -0.15328 | -2.26176 |
| I36P | 0.46287  | -0.68672 | -1.7885  |
| I36Q | -1.62737 | -0.62083 | -2.59139 |
| I36R | -0.93465 | 0.43676  | -2.83361 |
| I36S | -1.99768 | -1.39239 | -2.71171 |

|      |          |          |          |
|------|----------|----------|----------|
| I36T | -0.94813 | -0.21827 | -1.85245 |
| I36V | -0.89808 | -0.37002 | -1.35806 |
| I36W | -2.0508  | -0.52367 | -1.66114 |
| I36Y | 0.27546  | -0.48551 | -1.69036 |
| I36X | -0.98165 | -0.66974 | -0.87639 |
| E37A | 0.87678  | 1.54085  | 1.65838  |
| E37C | 1.54933  | 1.23953  | 0.79409  |
| E37D | 0.11494  | 0.50582  | 0.03503  |
| E37E | NA       | NA       | NA       |
| E37F | 1.11016  | 0.64694  | 0.78607  |
| E37G | 0.04024  | -0.46562 | 0.55883  |
| E37H | -1.30877 | 0.50453  | 0.35596  |
| E37I | -0.09185 | 0.63226  | 0.51262  |
| E37K | 0.81584  | 1.14159  | 0.32187  |
| E37L | 2.02888  | 2.43148  | 3.1524   |
| E37M | 1.17762  | 1.20701  | 1.62775  |
| E37N | -0.66151 | 0.0868   | 0.16465  |
| E37P | -1.08537 | 0.05904  | -2.5442  |
| E37Q | -0.69822 | -0.71074 | 1.70155  |
| E37R | 1.23224  | 1.14199  | 0.13431  |
| E37S | -1.11443 | -0.26007 | 1.29708  |
| E37T | -0.24981 | -0.28804 | -0.12388 |
| E37V | 0.16538  | 0.34752  | 0.33471  |
| E37W | -0.5504  | -0.17611 | -0.95741 |
| E37Y | -0.3165  | -0.12588 | 0.44785  |
| E37X | -0.25207 | -0.30034 | -1.16477 |
| D38A | -0.49683 | -0.21832 | -2.5598  |
| D38C | -0.75097 | -0.44657 | -2.21455 |
| D38D | NA       | NA       | NA       |
| D38E | -0.47349 | -0.06584 | -0.74653 |
| D38F | -0.91537 | -1.75449 | -2.73696 |
| D38G | -0.89358 | -1.70529 | -3.49472 |
| D38H | -1.17217 | -0.7722  | -2.87215 |
| D38I | -0.92902 | -0.85819 | -1.84485 |
| D38K | -0.94009 | -0.33406 | -2.33676 |
| D38L | -0.21961 | -0.53832 | -2.67019 |
| D38M | -0.37545 | -1.48907 | -2.89473 |
| D38N | -1.98358 | -1.60962 | -3.92367 |
| D38P | -0.90045 | -1.29954 | -3.0655  |
| D38Q | -1.0323  | -0.91221 | -3.72233 |
| D38R | -0.28192 | -0.48552 | -3.24577 |
| D38S | -1.01933 | -0.37268 | -3.10629 |
| D38T | -0.44714 | 0.10922  | -2.15708 |

|      |          |          |          |
|------|----------|----------|----------|
| D38V | -0.64543 | -0.03942 | -1.22174 |
| D38W | -0.95114 | -0.97287 | -2.54452 |
| D38Y | -1.43216 | -1.43138 | -2.62348 |
| D38X | -0.69829 | -1.38135 | -0.46599 |
| S39A | 0.26454  | 0.11696  | -0.59801 |
| S39C | -1.27758 | -1.5496  | -1.17162 |
| S39D | -1.41484 | -1.49316 | -1.46066 |
| S39E | -1.0649  | -1.08562 | -1.89118 |
| S39F | -1.7633  | -2.06847 | -1.68861 |
| S39G | -0.18304 | -0.01196 | 3.21417  |
| S39H | -1.32798 | -0.90186 | -2.33368 |
| S39I | -0.94063 | -1.30031 | -1.45391 |
| S39K | -1.1601  | -1.23402 | -0.1884  |
| S39L | -0.65111 | -0.67999 | 0.43568  |
| S39M | -0.82744 | -1.39568 | 1.02084  |
| S39N | -0.39185 | -1.70876 | -2.25052 |
| S39P | NA       | NA       | NA       |
| S39Q | -0.24373 | 0.232    | -0.84438 |
| S39R | -2.97626 | -3.98152 | -1.71365 |
| S39S | -0.73362 | -0.96358 | -0.66517 |
| S39T | 0.02838  | 0.13388  | -0.9109  |
| S39V | -1.02573 | -2.15985 | -2.70524 |
| S39W | -2.29554 | -1.47321 | -2.52033 |
| S39Y | -0.57484 | -2.25306 | -2.42957 |
| S39X | 0.20063  | -0.42572 | -1.27267 |
| Y40A | -1.32472 | 0.3292   | -1.55433 |
| Y40C | 0.28824  | 0.1494   | -1.51234 |
| Y40D | 0.1718   | -0.8412  | -1.2194  |
| Y40E | 0.64566  | 0.34336  | -0.25445 |
| Y40F | -1.17093 | -0.46189 | -3.4546  |
| Y40G | 0.09871  | 0.63356  | -0.40508 |
| Y40H | -0.6356  | -2.09388 | -0.46378 |
| Y40I | -1.36148 | -0.71806 | -0.99273 |
| Y40K | -0.43192 | -0.38003 | -0.52088 |
| Y40L | -0.73316 | -0.12023 | -0.79447 |
| Y40M | -0.62804 | -1.02546 | -0.91791 |
| Y40N | -0.44521 | -0.92787 | -1.27205 |
| Y40P | -0.84432 | -0.68482 | -0.92585 |
| Y40Q | -0.6856  | -1.60883 | -0.22836 |
| Y40R | -0.3656  | -0.35705 | -0.80284 |
| Y40S | -0.25635 | -0.04778 | -0.24278 |
| Y40T | -0.13175 | 0.21352  | -0.58557 |
| Y40V | -0.24583 | -0.09773 | -0.99215 |

|      |          |          |          |
|------|----------|----------|----------|
| Y40W | -0.24141 | -0.79535 | -0.31781 |
| Y40Y | NA       | NA       | NA       |
| Y40X | -0.21241 | -0.28839 | -0.64337 |
| R41A | -0.32501 | -0.62196 | 0.21701  |
| R41C | 1.1811   | 0.92669  | 0.81962  |
| R41D | 0.09415  | -0.75879 | -0.98757 |
| R41E | 0.83622  | 0.02308  | -0.52515 |
| R41F | 0.7694   | -0.41352 | 0.78548  |
| R41G | 0.46047  | 0.5315   | 0.25385  |
| R41H | 0.14782  | -0.07843 | -0.11388 |
| R41I | 0.9415   | 0.47335  | 2.19182  |
| R41K | -0.08032 | -0.24818 | 0.36543  |
| R41L | 1.57062  | 1.63877  | 1.90271  |
| R41M | 1.1216   | 0.68088  | 1.43854  |
| R41N | -0.35644 | -0.28091 | -0.87656 |
| R41P | -0.03295 | -0.33308 | 0.47102  |
| R41Q | 0.04734  | -0.19331 | 0.49352  |
| R41R | -0.37612 | -0.14438 | 0.39151  |
| R41S | 0.61447  | 0.13248  | -0.24866 |
| R41T | -0.02662 | -0.66803 | -0.09244 |
| R41V | 0.03808  | -0.76902 | 0.88038  |
| R41W | 1.32633  | 0.36846  | 0.95584  |
| R41Y | 1.34278  | -0.0012  | 0.03076  |
| R41X | -0.20589 | 0.12721  | -0.57512 |
| K42A | 0.77548  | 0.81117  | 0.94466  |
| K42C | 0.57779  | -0.5295  | 1.8146   |
| K42D | 1.01182  | 0.58044  | 0.91823  |
| K42E | 1.35924  | -0.11853 | 0.85086  |
| K42F | 0.26072  | 0.43587  | 1.50367  |
| K42G | 1.74973  | 0.77221  | 0.68829  |
| K42H | 0.85449  | 0.54042  | 0.87101  |
| K42I | 0.27177  | 0.43066  | 1.46204  |
| K42K | NA       | NA       | NA       |
| K42L | -0.28756 | -0.78845 | 1.56494  |
| K42M | 0.99858  | 0.38379  | 2.15212  |
| K42N | 0.5455   | -0.17002 | 1.68967  |
| K42P | 0.18079  | -0.94103 | 1.62637  |
| K42Q | -0.28923 | 0.03953  | 1.45677  |
| K42R | 0.28153  | 0.73384  | 2.13376  |
| K42S | 1.17972  | 0.47357  | 1.50533  |
| K42T | 0.04795  | -0.33175 | 0.9134   |
| K42V | 0.73957  | -0.07646 | 2.16066  |
| K42W | 1.05901  | 0.53206  | 1.34217  |

|      |          |          |          |
|------|----------|----------|----------|
| K42Y | 0.65486  | 0.00879  | 1.02068  |
| K42X | -0.20556 | -0.46201 | -0.24262 |
| Q43A | -0.72331 | -0.86786 | -0.39516 |
| Q43C | -0.36693 | -0.62556 | 0.73729  |
| Q43D | -1.75442 | -1.23137 | -0.42254 |
| Q43E | 0.17613  | 0.47052  | -0.75076 |
| Q43F | 1.3646   | 0.73604  | -0.11859 |
| Q43G | -0.04173 | -0.1726  | 0.31258  |
| Q43H | -0.01702 | 0.24286  | -0.10818 |
| Q43I | -0.24322 | 0.21791  | -0.5277  |
| Q43K | 0.5685   | -0.23994 | 0.02447  |
| Q43L | 0.28993  | 0.19297  | -0.27665 |
| Q43M | -0.75775 | -1.57821 | -0.13901 |
| Q43N | -0.16926 | -0.77645 | -0.65071 |
| Q43P | 0.8556   | 0.02578  | 0.46396  |
| Q43Q | NA       | NA       | NA       |
| Q43R | -0.34543 | -1.01208 | 0.12906  |
| Q43S | -0.92079 | -0.73079 | -0.4034  |
| Q43T | -0.8952  | -0.19034 | -0.32869 |
| Q43V | -0.56393 | -0.40435 | -0.58282 |
| Q43W | -0.85307 | -0.47724 | -0.64719 |
| Q43Y | -0.12427 | 0.06838  | -0.28484 |
| Q43X | 0.17028  | 0.01404  | -0.29636 |
| V44A | -0.47269 | -0.64531 | 1.23797  |
| V44C | 0.00949  | -0.23946 | 0.65873  |
| V44D | 0.96788  | -0.63312 | 0.99901  |
| V44E | -0.04225 | -0.35577 | 0.76929  |
| V44F | -0.7202  | -1.39677 | -0.39394 |
| V44G | 0.4658   | 1.10117  | 1.14849  |
| V44H | -0.44051 | -0.52933 | 1.79644  |
| V44I | -0.55128 | 0.26945  | -0.17003 |
| V44K | -0.81823 | -0.17303 | 0.21665  |
| V44L | 0.02488  | 0.46198  | 0.41508  |
| V44M | 0.59416  | 0.12781  | 0.26062  |
| V44N | 0.58106  | 1.61899  | 1.14254  |
| V44P | -0.34543 | -0.36551 | 0.94182  |
| V44Q | -0.5208  | -0.28867 | 0.72809  |
| V44R | -0.40666 | -0.38441 | 0.87617  |
| V44S | -0.35493 | 0.94023  | 0.83997  |
| V44T | -0.74819 | -0.40255 | 0.45987  |
| V44V | NA       | NA       | NA       |
| V44W | -0.76575 | -0.3088  | 1.92215  |
| V44Y | -1.15137 | -0.36654 | 0.35233  |

|      |          |          |          |
|------|----------|----------|----------|
| V44X | 0.3029   | 0.37503  | -0.57606 |
| V45A | -0.84406 | -0.39324 | -0.45215 |
| V45C | -0.29632 | -0.36241 | 0.29352  |
| V45D | -0.93996 | -0.20596 | -0.46543 |
| V45E | -0.38199 | 0.16793  | -0.46884 |
| V45F | 0.40758  | 0.35874  | -0.3751  |
| V45G | -1.7516  | -1.94485 | -0.63743 |
| V45H | -0.20618 | -0.31185 | -0.29566 |
| V45I | 0.11222  | -0.36816 | -0.76436 |
| V45K | 0.07018  | 0.45596  | 0.29234  |
| V45L | 0.14145  | 0.09754  | -0.63356 |
| V45M | -0.32067 | -0.51227 | -0.4385  |
| V45N | -0.88201 | -0.78288 | -0.52577 |
| V45P | -1.72983 | -0.45558 | -0.91424 |
| V45Q | -0.55602 | 0.06716  | -0.60492 |
| V45R | -0.19483 | -0.21526 | 0.2261   |
| V45S | -0.81192 | 0.12169  | -0.41878 |
| V45T | 0.1916   | 0.47199  | 0.24401  |
| V45V | NA       | NA       | NA       |
| V45W | -1.07873 | -0.60172 | -0.39503 |
| V45Y | -0.46161 | -1.00787 | -1.08147 |
| V45X | 0.18357  | -0.17704 | -0.39934 |
| I46A | 0.31212  | -0.48563 | 0.19281  |
| I46C | 0.17577  | -0.25336 | -0.1167  |
| I46D | -0.69251 | 0.0536   | 1.67859  |
| I46E | 0.4676   | 0.02237  | 1.9666   |
| I46F | 0.52881  | -0.14341 | -0.55447 |
| I46G | -0.04575 | -0.64979 | 1.41745  |
| I46H | -1.63487 | -0.43413 | -0.19911 |
| I46I | NA       | NA       | NA       |
| I46K | -1.23689 | -0.44866 | 0.00493  |
| I46L | -0.26498 | 0.81289  | -0.38832 |
| I46M | -0.18984 | 0.14614  | -0.01324 |
| I46N | 0.96005  | 0.83692  | 0.71119  |
| I46P | 0.38655  | 0.60461  | 1.07852  |
| I46Q | -1.44748 | -1.06764 | -0.09184 |
| I46R | -0.26091 | -0.90723 | -0.61285 |
| I46S | -0.70493 | -0.45463 | 0.51935  |
| I46T | -0.50743 | -0.33579 | 0.2708   |
| I46V | 0.06851  | -0.13128 | -0.05357 |
| I46W | 0.9694   | 0.19828  | -1.18302 |
| I46Y | -0.1187  | 0.01357  | -0.70763 |
| I46X | 0.0841   | -0.22291 | -0.64768 |

|      |          |          |          |
|------|----------|----------|----------|
| D47A | -0.79425 | -0.86892 | 0.84755  |
| D47C | -1.20225 | -1.61505 | 0.65081  |
| D47D | NA       | NA       | NA       |
| D47E | -0.83607 | -0.10853 | -0.00705 |
| D47F | -1.21568 | -1.21952 | 0.56573  |
| D47G | -0.51829 | -0.26506 | 0.50594  |
| D47H | -1.29198 | -0.60602 | 0.35419  |
| D47I | 0.4631   | 0.4363   | 1.68411  |
| D47K | -0.01655 | -0.29226 | -0.1727  |
| D47L | -0.71614 | -0.50948 | 1.16975  |
| D47M | -1.01599 | -0.44026 | 1.22294  |
| D47N | -0.08262 | 0.20626  | -0.09037 |
| D47P | 0.0662   | -0.32346 | 2.16548  |
| D47Q | -1.99644 | -0.15028 | 0.30107  |
| D47R | -0.29921 | -1.12363 | 0.22393  |
| D47S | -1.89509 | -0.54358 | -0.69167 |
| D47T | -0.7306  | -0.04358 | 0.20159  |
| D47V | -2.06696 | -0.20381 | 1.36305  |
| D47W | -1.00219 | -0.293   | 0.54018  |
| D47Y | -0.73918 | -0.47923 | 0.60527  |
| D47X | -1.55101 | -2.48261 | -0.88642 |
| G48A | -0.87623 | -0.0936  | -0.16004 |
| G48C | -1.26539 | -0.59331 | -0.15984 |
| G48D | -0.40507 | -1.90496 | 0.6486   |
| G48E | -1.04292 | -0.79302 | -0.07972 |
| G48F | -2.1105  | -1.60997 | -0.11686 |
| G48G | NA       | NA       | NA       |
| G48H | -0.40035 | 0.00556  | 0.23421  |
| G48I | -0.36065 | 0.05187  | 0.47887  |
| G48K | -0.55657 | 0.09399  | 0.58153  |
| G48L | 0.12575  | -0.34516 | -0.111   |
| G48M | -1.11565 | 0.91829  | 0.28935  |
| G48N | -0.65008 | -0.07358 | 0.30924  |
| G48P | 0.35092  | 0.72695  | 1.49326  |
| G48Q | -0.22168 | 1.06379  | -0.10907 |
| G48R | -0.05885 | -0.47732 | 0.40355  |
| G48S | -0.68087 | 0.44709  | 0.088    |
| G48T | -0.9036  | 0.83426  | 0.18716  |
| G48V | 0.12115  | -0.63809 | 0.31262  |
| G48W | -0.71557 | -0.77782 | -0.16293 |
| G48Y | -0.10188 | -0.44707 | 0.2802   |
| G48X | 0.37561  | 0.01264  | -0.8724  |
| E49A | -0.77203 | -0.5672  | 0.82959  |

|      |          |          |           |
|------|----------|----------|-----------|
| E49C | 0.0158   | 0.12578  | 0.58941   |
| E49D | -0.01429 | 0.20085  | 0.20405   |
| E49E | NA       | NA       | NA        |
| E49F | -0.28774 | -0.46389 | 0.37765   |
| E49G | -1.35522 | -0.81075 | 0.08023   |
| E49H | -0.54766 | -0.36794 | 0.26752   |
| E49I | 0.19626  | -0.02478 | 1.57159   |
| E49K | -0.80729 | -0.66301 | 0.18887   |
| E49L | 0.37309  | 0.21774  | 0.33602   |
| E49M | -0.47164 | -1.41584 | 0.29671   |
| E49N | 0.29905  | -0.97884 | 0.07962   |
| E49P | -0.99097 | -0.61967 | 0.40052   |
| E49Q | -0.65888 | -1.70617 | 0.35862   |
| E49R | -0.78696 | -0.41375 | -9.00E-05 |
| E49S | -0.52183 | -1.19961 | 0.64484   |
| E49T | -0.35775 | 0.37196  | 0.79415   |
| E49V | -0.62828 | 0.63586  | 1.3209    |
| E49W | -1.11426 | 0.28103  | 0.6083    |
| E49Y | -0.17059 | -0.29399 | 0.30127   |
| E49X | -0.17714 | -0.05706 | -0.70376  |
| T50A | -0.41927 | -0.00415 | 0.54371   |
| T50C | -0.20858 | -0.94237 | -0.2387   |
| T50D | 0.26216  | 0.27826  | 0.30007   |
| T50E | -1.46708 | -1.1575  | -0.5623   |
| T50F | -0.95531 | -0.87896 | -0.72416  |
| T50G | -0.30837 | -1.52914 | -0.20821  |
| T50H | 0.19307  | -0.47792 | -0.56294  |
| T50I | -1.18715 | -0.44596 | -0.35265  |
| T50K | -0.54584 | -0.22966 | -0.05854  |
| T50L | -1.0998  | -0.65966 | -0.50108  |
| T50M | 0.31469  | -1.92777 | -1.19966  |
| T50N | -0.07579 | 0.33621  | -0.14203  |
| T50P | 0.27255  | 0.90028  | 0.3141    |
| T50Q | -0.45359 | -0.11291 | -0.21521  |
| T50R | 0.25363  | 0.89533  | 0.09058   |
| T50S | -0.89463 | -0.43537 | -0.01391  |
| T50T | NA       | NA       | NA        |
| T50V | -0.62544 | 0.22446  | -0.17269  |
| T50W | 0.11023  | 0.55284  | -0.64221  |
| T50Y | -0.46065 | -1.22155 | 0.14924   |
| T50X | -0.13299 | -0.08708 | -0.44737  |
| C51A | 0.19241  | 0.06334  | -0.40088  |
| C51C | NA       | NA       | NA        |



|      |          |          |          |
|------|----------|----------|----------|
| C51D | -0.34942 | 0.22303  | 1.25055  |
| C51E | 0.83077  | 1.54173  | 1.22752  |
| C51F | -1.27838 | -1.39581 | 0.94166  |
| C51G | -0.77922 | -0.53362 | 0.23437  |
| C51H | -0.65759 | -1.04707 | 0.06035  |
| C51I | -0.25729 | -0.1929  | 0.09055  |
| C51K | -0.96054 | -0.09033 | 0.47162  |
| C51L | -0.01669 | -0.69828 | 0.88337  |
| C51M | 0.70496  | 0.0844   | 0.43461  |
| C51N | -0.38669 | -0.2356  | 0.55469  |
| C51P | -0.00736 | -0.14698 | 2.00397  |
| C51Q | -1.2384  | -0.29979 | 0.69052  |
| C51R | -1.03706 | -0.15806 | 0.47646  |
| C51S | 0.09322  | 0.38972  | -0.07594 |
| C51T | 0.60143  | 0.81489  | 0.26572  |
| C51V | -0.23137 | -0.93802 | -0.03728 |
| C51W | -0.02004 | -0.2619  | 0.44277  |
| C51Y | 0.38017  | -0.89511 | 0.36735  |
| C51X | 0.02394  | 0.75769  | -0.77863 |
| L52A | 0.00101  | -0.79112 | 0.00775  |
| L52C | -0.04551 | -0.81486 | 0.00903  |
| L52D | -0.43104 | -1.61587 | -0.20776 |
| L52E | 1.04914  | -0.57616 | -0.69067 |
| L52F | -0.41716 | 0.31324  | 0.59203  |
| L52G | -0.93909 | -0.36535 | -0.24008 |
| L52H | -0.13669 | -0.09895 | -0.09184 |
| L52I | 0.01032  | -0.1916  | 0.92679  |
| L52K | -0.91017 | 0.07875  | 0.65377  |
| L52L | 0.10502  | 0.41592  | -0.04523 |
| L52M | -1.019   | 0.39945  | 0.03868  |
| L52N | -0.75838 | -0.44183 | -0.67802 |
| L52P | 0.46535  | 0.33936  | 1.85274  |
| L52Q | -0.06163 | -0.44847 | 0.66357  |
| L52R | 1.04305  | 0.23453  | 0.81752  |
| L52S | -0.17377 | 0.61573  | -0.12214 |
| L52T | 0.48916  | -0.68888 | -0.05843 |
| L52V | -0.20993 | 0.50057  | 0.03226  |
| L52W | -0.25019 | -0.64091 | -0.79057 |
| L52Y | 0.56353  | -1.04078 | 0.73163  |
| L52X | 0.05518  | -0.42707 | -0.69377 |
| L53A | 0.47432  | 0.20726  | 2.89422  |
| L53C | -0.2103  | 0.03634  | 2.16783  |
| L53D | -0.35918 | -0.56739 | -0.5715  |

|      |          |          |          |
|------|----------|----------|----------|
| L53E | 1.44937  | 2.04855  | 0.84084  |
| L53F | -0.05938 | -0.28861 | 1.61171  |
| L53G | 0.92955  | 0.83741  | 2.17083  |
| L53H | 0.95459  | 1.20875  | -0.10619 |
| L53I | 1.41958  | 0.6528   | 2.06251  |
| L53K | 0.59474  | 0.57087  | 0.25973  |
| L53L | -1.09664 | -0.84724 | -0.03914 |
| L53M | 0.30768  | 0.38595  | 0.31957  |
| L53N | 0.67995  | 2.41765  | 2.12341  |
| L53P | 0.32524  | 0.80201  | 1.2334   |
| L53Q | 1.33407  | 0.19067  | 1.53968  |
| L53R | -0.66818 | -1.13697 | -0.81533 |
| L53S | 0.38654  | 0.79273  | 2.7809   |
| L53T | -0.08743 | 0.98773  | 2.72323  |
| L53V | 0.06692  | -0.06826 | 2.20287  |
| L53W | 0.48151  | 1.19721  | 1.12941  |
| L53Y | 0.15849  | 0.30695  | 1.71927  |
| L53X | -0.14596 | -1.50944 | -1.06277 |
| D54A | -0.62239 | -0.67943 | 0.94519  |
| D54C | -0.17538 | -1.09959 | 1.23071  |
| D54D | NA       | NA       | NA       |
| D54E | 0.00773  | -0.25924 | -0.5226  |
| D54F | 0.01369  | -0.15297 | 2.05226  |
| D54G | -1.67728 | -1.0721  | 1.05079  |
| D54H | -1.69013 | -0.6968  | 0.18645  |
| D54I | -0.50635 | 0.034    | 1.55932  |
| D54K | -0.00277 | -0.06838 | 1.33166  |
| D54L | -0.6477  | -0.29228 | -0.15751 |
| D54M | -0.97001 | -1.58879 | 0.93512  |
| D54N | -1.81065 | -1.78249 | -0.91427 |
| D54P | 0.55027  | 1.00694  | 2.08685  |
| D54Q | -0.81797 | 0.36625  | 0.67155  |
| D54R | -1.11468 | -1.36714 | 0.55324  |
| D54S | -1.5132  | -0.65505 | 0.03587  |
| D54T | -0.69581 | -0.37029 | 0.93642  |
| D54V | 0.00655  | -0.6632  | 1.73061  |
| D54W | -1.22613 | -0.24407 | 0.75562  |
| D54Y | -0.20758 | 0.34004  | 2.48938  |
| D54X | 0.01995  | -0.25426 | -0.82732 |
| I55A | 2.05429  | 0.33705  | 2.08303  |
| I55C | 1.14629  | 1.31803  | 1.55463  |
| I55D | -0.22758 | -1.80241 | -0.90945 |
| I55E | 0.07884  | -0.60609 | -0.28076 |

|      |          |          |          |
|------|----------|----------|----------|
| I55F | 0.69333  | -0.67101 | 3.23896  |
| I55G | -0.2142  | 0.16836  | -1.37712 |
| I55H | 1.2104   | 0.84699  | 0.41222  |
| I55I | NA       | NA       | NA       |
| I55K | 0.17084  | 0.2338   | -0.39878 |
| I55L | -1.07541 | -0.16665 | 2.22914  |
| I55M | -0.54291 | -0.16976 | 0.80118  |
| I55N | 0.59522  | 0.59293  | 1.06944  |
| I55P | NA       | NA       | NA       |
| I55Q | -0.49512 | -0.46772 | -0.5284  |
| I55R | -0.01196 | -1.04719 | -0.68268 |
| I55S | 0.18156  | -1.32926 | 1.69841  |
| I55T | -0.53629 | -1.16439 | 2.6038   |
| I55V | -1.17309 | -0.03502 | 0.64015  |
| I55W | -1.76076 | -2.3368  | -1.8562  |
| I55Y | 0.17363  | 0.23919  | 0.24798  |
| I55X | -0.45071 | -0.73674 | -0.52155 |
| L56A | -0.07348 | 0.14026  | 1.02255  |
| L56C | 0.28431  | 0.75149  | 2.51714  |
| L56D | 0.42263  | 0.20015  | 1.69417  |
| L56E | 0.71407  | 2.85721  | -0.05383 |
| L56F | 0.46234  | 0.40676  | -0.78792 |
| L56G | 0.51899  | 2.09627  | 0.49472  |
| L56H | -0.82611 | -0.76668 | 1.71111  |
| L56I | -0.56375 | 0.10944  | 1.91986  |
| L56K | -0.62811 | -1.32907 | -1.91224 |
| L56L | -1.74248 | -1.11553 | -0.50217 |
| L56M | -0.55709 | 0.79543  | -0.80144 |
| L56N | 1.80305  | 2.29681  | 1.90036  |
| L56P | -0.7499  | -0.94768 | -0.79965 |
| L56Q | -0.73902 | -0.20862 | -1.43108 |
| L56R | -2.11964 | -0.4893  | -2.5076  |
| L56S | 0.31722  | 0.8988   | 1.53762  |
| L56T | 9.00E-05 | 0.15413  | 0.23178  |
| L56V | -0.27242 | 0.27407  | 0.78478  |
| L56W | -1.33762 | -1.04168 | -0.2034  |
| L56Y | -1.29111 | -0.78771 | 0.21121  |
| L56X | 0.53469  | -0.01473 | -0.79577 |
| D57A | -0.89827 | -0.94315 | -3.52372 |
| D57C | 0.11766  | 1.10759  | -2.81662 |
| D57D | NA       | NA       | NA       |
| D57E | 0.04657  | 0.17936  | -0.56849 |
| D57F | -1.08692 | -0.67393 | -3.20581 |

|      |          |          |          |
|------|----------|----------|----------|
| D57G | -0.78449 | -1.84622 | -2.82224 |
| D57H | -1.09643 | -0.82827 | -2.00801 |
| D57I | -0.04638 | 0.05881  | -3.51641 |
| D57K | -0.40253 | -0.48776 | -2.0773  |
| D57L | -1.18187 | -2.29547 | -3.40495 |
| D57M | -1.19876 | -1.63765 | -2.17718 |
| D57N | -0.35974 | 0.44934  | -2.62698 |
| D57P | -0.01158 | -1.91916 | -2.27007 |
| D57Q | 0.075    | -0.91094 | -1.7052  |
| D57R | 0.09503  | -1.56892 | -2.07862 |
| D57S | -0.85308 | -0.58741 | -2.11359 |
| D57T | -1.23583 | -0.47853 | -2.83346 |
| D57V | -0.71799 | -0.07425 | -3.48034 |
| D57W | -0.78309 | -1.40006 | -2.05978 |
| D57Y | -0.90962 | -1.2081  | -2.30125 |
| D57X | -0.53946 | -1.09014 | -1.01386 |
| T58A | -0.37309 | -0.09657 | 1.25636  |
| T58C | -0.17709 | 0.05987  | 0.4426   |
| T58D | -1.0587  | -1.05891 | -1.17695 |
| T58E | 0.48364  | 0.38355  | 0.49455  |
| T58F | -0.25515 | -0.67748 | -0.12026 |
| T58G | -0.24809 | -0.13474 | -0.05121 |
| T58H | -0.28544 | -0.18503 | -1.05649 |
| T58I | -0.66053 | 0.07296  | -0.03345 |
| T58K | 0.01785  | 0.07973  | -1.96635 |
| T58L | -0.66318 | -0.53039 | -0.26698 |
| T58M | -0.27898 | 0.34975  | -0.15885 |
| T58N | 0.96545  | -0.67066 | -0.48894 |
| T58P | -1.71609 | -1.10206 | -1.50371 |
| T58Q | 0.40259  | 0.3561   | -0.39359 |
| T58R | 0.1289   | -0.54206 | -1.95676 |
| T58S | 0.36542  | -0.29271 | 1.26945  |
| T58T | NA       | NA       | NA       |
| T58V | -0.47662 | -0.46826 | 1.25636  |
| T58W | 0.3966   | -0.98905 | -1.13888 |
| T58Y | -0.45409 | -0.22424 | -0.28622 |
| T58X | -0.43057 | -0.30004 | -0.59573 |
| A59A | NA       | NA       | NA       |
| A59C | -0.98173 | -0.74723 | 0.37249  |
| A59D | -0.0426  | -0.31679 | -0.54824 |
| A59E | -0.04259 | -0.09417 | -0.31092 |
| A59F | -0.64047 | -0.91839 | -1.00169 |
| A59G | 2.14543  | 3.65627  | 2.24563  |

|      |          |          |          |
|------|----------|----------|----------|
| A59H | 0.06137  | -1.42201 | -0.40356 |
| A59I | 0.58692  | 0.00628  | -0.44984 |
| A59K | -0.24859 | 0.40886  | -2.6205  |
| A59L | 0.17883  | -0.25009 | -0.52078 |
| A59M | -0.59488 | -0.70971 | -1.45061 |
| A59N | -0.0339  | 0.3936   | 0.61436  |
| A59P | 0.27135  | 0.14311  | -0.21334 |
| A59Q | -0.28322 | -0.67449 | -0.2508  |
| A59R | -1.29452 | -0.7176  | -3.50347 |
| A59S | 2.77387  | 4.57712  | 1.95999  |
| A59T | 2.31743  | 2.86442  | 1.31528  |
| A59V | -0.27254 | -1.10522 | -1.18864 |
| A59W | -0.72765 | -0.85938 | -1.59394 |
| A59Y | -0.59002 | -1.30157 | -1.32601 |
| A59X | -0.9518  | -1.14283 | -0.82731 |
| G60A | -0.20618 | -0.04475 | -1.41651 |
| G60C | -0.05617 | -0.37815 | -0.95289 |
| G60D | 0.35972  | -0.06221 | -0.31726 |
| G60E | -0.65695 | -0.60043 | -0.93133 |
| G60F | -0.48881 | -1.02606 | -0.84178 |
| G60G | NA       | NA       | NA       |
| G60H | 0.07158  | -0.20179 | -0.63158 |
| G60I | -0.73962 | -0.44711 | -0.92764 |
| G60K | 0.21286  | -0.23935 | -1.47769 |
| G60L | -0.44232 | -0.17639 | -1.3212  |
| G60M | 0.08385  | -0.00026 | -0.91334 |
| G60N | 0.30176  | 0.2351   | -0.70016 |
| G60P | 0.63548  | 0.80001  | -1.54929 |
| G60Q | -0.70054 | -0.16669 | -0.52736 |
| G60R | -0.21947 | -0.43773 | -1.67753 |
| G60S | 0.60654  | -0.32531 | -1.1822  |
| G60T | 0.14725  | -0.10619 | -1.45142 |
| G60V | 0.72007  | 0.3405   | -1.01292 |
| G60W | 0.87808  | 0.40434  | -0.88064 |
| G60Y | -0.00752 | 0.13618  | -0.66293 |
| G60X | 1.08958  | 0.41833  | -0.89346 |
| Q61A | -0.68291 | -0.82044 | -0.59414 |
| Q61C | 0.26789  | 0.43581  | 0.3509   |
| Q61D | -0.74642 | 0.14003  | 0.28302  |
| Q61E | 0.41553  | 0.27495  | -0.82267 |
| Q61F | 0.11241  | -0.28742 | -0.72517 |
| Q61G | -0.0373  | 0.01854  | -0.94775 |
| Q61H | 0.3872   | 0.51177  | 0.27552  |

|      |          |          |          |
|------|----------|----------|----------|
| Q61I | 1.08127  | 0.54526  | 1.12172  |
| Q61K | -0.7489  | 0.0416   | -0.52869 |
| Q61L | 2.01734  | 2.66656  | 1.78105  |
| Q61M | 1.91578  | 2.65514  | 1.08247  |
| Q61N | 1.24989  | 1.43046  | -0.00268 |
| Q61P | -0.17077 | -0.55113 | -1.18812 |
| Q61Q | NA       | NA       | NA       |
| Q61R | 4.7804   | 6.15824  | 1.44152  |
| Q61S | 1.22413  | 1.17899  | 0.31338  |
| Q61T | 0.09591  | 0.5535   | -0.28068 |
| Q61V | 0.09079  | 0.32868  | 0.1275   |
| Q61W | 1.22012  | 0.70255  | -0.20436 |
| Q61Y | -0.27623 | 0.31878  | -0.35126 |
| Q61X | 1.73716  | -0.55408 | -0.90488 |
| E62A | -0.41442 | -0.43887 | -1.19183 |
| E62C | -0.11748 | -0.02119 | -0.94365 |
| E62D | 2.70769  | -0.15759 | 0.30596  |
| E62E | NA       | NA       | NA       |
| E62F | -0.49569 | -1.0617  | -1.28379 |
| E62G | 1.40418  | 0.02371  | -0.97454 |
| E62H | 0.7372   | 0.99265  | -0.89491 |
| E62I | -0.27018 | -0.17875 | -1.2618  |
| E62K | 0.15092  | -0.36257 | -1.31422 |
| E62L | -0.08607 | -0.38401 | -0.8581  |
| E62M | 0.10073  | -0.02569 | -1.26765 |
| E62N | 0.53237  | -0.19    | -0.90955 |
| E62P | 0.63267  | -0.80389 | -0.83292 |
| E62Q | -0.2677  | 0.32923  | -1.42285 |
| E62R | 0.91588  | 0.48024  | -0.8277  |
| E62S | 0.10802  | 0.16297  | -0.81229 |
| E62T | -0.28606 | -0.61229 | -0.91637 |
| E62V | -0.60806 | -2.11271 | -1.22115 |
| E62W | -0.18916 | -0.933   | -1.17232 |
| E62Y | -0.55962 | -0.48007 | -1.30648 |
| E62X | -0.35916 | -1.10178 | -0.68695 |
| E63A | 0.42949  | -0.3854  | 1.21297  |
| E63C | 0.90728  | 1.04411  | 0.9625   |
| E63D | 0.77172  | 0.49221  | 0.66797  |
| E63E | NA       | NA       | NA       |
| E63F | 1.41797  | 0.35729  | -0.8345  |
| E63G | 1.19788  | -0.11615 | 0.67703  |
| E63H | 1.84836  | 1.04134  | -0.75533 |
| E63I | 0.17098  | 0.3605   | 0.17903  |

|      |          |          |          |
|------|----------|----------|----------|
| E63K | 0.82904  | 1.34541  | 0.94766  |
| E63L | 1.19574  | -0.84075 | 0.39176  |
| E63M | 1.02069  | 0.27274  | 0.15314  |
| E63N | 0.45547  | -0.27677 | -0.35485 |
| E63P | 0.87037  | 0.17774  | -1.49281 |
| E63Q | 1.07449  | -0.01689 | 2.7477   |
| E63R | 2.16613  | 0.94016  | 1.16741  |
| E63S | 0.01582  | 0.39978  | 1.81596  |
| E63T | 0.43861  | 0.33076  | 1.04485  |
| E63V | -0.36796 | -0.50035 | 0.56274  |
| E63W | -0.35492 | 0.34349  | -0.88752 |
| E63Y | 1.49681  | 1.44329  | -1.06637 |
| E63X | 0.16011  | -0.23969 | -0.90878 |
| Y64A | 0.16707  | 0.23746  | -1.20647 |
| Y64C | 1.27059  | 0.19242  | -0.62358 |
| Y64D | 2.74318  | -0.47923 | -0.26503 |
| Y64E | 2.14688  | 0.19504  | 0.3126   |
| Y64F | 1.3035   | -0.01261 | 0.32656  |
| Y64G | -0.58382 | -1.1048  | -1.09988 |
| Y64H | 1.35798  | -0.29642 | -0.61489 |
| Y64I | 1.44902  | -0.54251 | 0.85767  |
| Y64K | 1.55488  | 0.20077  | -0.64055 |
| Y64L | 3.60335  | 0.09481  | 1.16216  |
| Y64M | 0.81718  | -0.54006 | -0.3313  |
| Y64N | 3.34185  | -0.50027 | 0.04456  |
| Y64P | 0.40438  | -0.2504  | -1.2871  |
| Y64Q | 1.30644  | 0.17256  | 0.48722  |
| Y64R | 1.26532  | 0.01123  | -0.78548 |
| Y64S | -0.02356 | -0.08456 | -1.04139 |
| Y64T | 1.83158  | -0.45798 | 1.12181  |
| Y64V | -0.61232 | -0.64424 | -0.0836  |
| Y64W | 0.58153  | -0.55592 | -1.07701 |
| Y64Y | NA       | NA       | NA       |
| Y64X | -0.60746 | -1.3065  | -0.85467 |
| S65A | NA       | NA       | NA       |
| S65C | NA       | NA       | NA       |
| S65D | NA       | NA       | NA       |
| S65E | NA       | NA       | NA       |
| S65F | NA       | NA       | NA       |
| S65G | NA       | NA       | NA       |
| S65H | NA       | NA       | NA       |
| S65I | NA       | NA       | NA       |
| S65K | NA       | NA       | NA       |

|      |          |          |          |
|------|----------|----------|----------|
| S65L | NA       | NA       | NA       |
| S65M | NA       | NA       | NA       |
| S65N | NA       | NA       | NA       |
| S65P | NA       | NA       | NA       |
| S65Q | NA       | NA       | NA       |
| S65R | NA       | NA       | NA       |
| S65S | NA       | NA       | NA       |
| S65T | NA       | NA       | NA       |
| S65V | NA       | NA       | NA       |
| S65W | NA       | NA       | NA       |
| S65Y | NA       | NA       | NA       |
| S65X | NA       | NA       | NA       |
| A66A | NA       | NA       | NA       |
| A66C | -0.31794 | 0.56496  | 0.53079  |
| A66D | 1.74329  | 0.63575  | 1.48634  |
| A66E | -0.46864 | -0.46561 | 1.77173  |
| A66F | 0.23737  | -0.03835 | 0.67424  |
| A66G | 0.35881  | -0.13116 | 3.00709  |
| A66H | 0.05703  | 0.69215  | 2.18462  |
| A66I | -0.30154 | -0.35125 | 0.16128  |
| A66K | 0.76707  | 0.06704  | 2.41734  |
| A66L | -0.18584 | 0.43186  | 0.80777  |
| A66M | 0.57054  | 0.57586  | 1.17625  |
| A66N | -0.0535  | -0.24746 | 3.3879   |
| A66P | -0.50817 | -0.04777 | 1.74682  |
| A66Q | -0.48758 | -0.47944 | 2.5729   |
| A66R | -0.77132 | 0.70295  | 2.46278  |
| A66S | -0.62829 | 0.50684  | 2.25574  |
| A66T | -0.02184 | -0.36388 | 2.0442   |
| A66V | -1.79602 | -1.66442 | 1.10363  |
| A66W | 0.27332  | 0.68063  | 0.32964  |
| A66Y | 1.33231  | 1.28416  | 3.39497  |
| A66X | -0.25536 | -0.71658 | -0.96521 |
| M67A | -1.23567 | -1.19861 | -1.06359 |
| M67C | -1.6222  | -0.39586 | -1.99393 |
| M67D | -0.92422 | -0.33588 | -1.12488 |
| M67E | -0.38087 | -1.03315 | -1.2945  |
| M67F | -2.07196 | -0.85544 | -0.57552 |
| M67G | -0.10383 | -0.10406 | -0.38001 |
| M67H | -0.6713  | -0.25291 | -2.26929 |
| M67I | -0.88388 | -0.10657 | -1.11665 |
| M67K | -0.71256 | -0.05261 | -1.44374 |
| M67L | -0.22802 | -0.52909 | -0.69657 |



|      |          |          |          |
|------|----------|----------|----------|
| M67M | NA       | NA       | NA       |
| M67N | -0.59723 | -0.37333 | -0.12591 |
| M67P | 0.28033  | 0.79029  | -1.48573 |
| M67Q | -1.3456  | -1.06941 | -1.58545 |
| M67R | -0.06832 | -0.2931  | -1.68522 |
| M67S | -0.96765 | -0.89211 | -1.02107 |
| M67T | -0.47694 | 0.23159  | -1.3007  |
| M67V | -0.04341 | 0.15291  | -1.9843  |
| M67W | -0.71195 | -0.89658 | -1.20524 |
| M67Y | -0.18889 | -0.4405  | -2.39016 |
| M67X | 0.46231  | 0.14658  | -0.70256 |
| R68A | 2.59457  | 2.36504  | 0.07717  |
| R68C | 1.96737  | 1.12311  | 0.11364  |
| R68D | 3.90642  | 0.36227  | 0.2104   |
| R68E | 3.77802  | -0.61126 | 0.48133  |
| R68F | 2.93616  | 0.46119  | -0.97488 |
| R68G | 0.77864  | 0.44941  | -0.17212 |
| R68H | 2.97199  | 0.04146  | 0.35824  |
| R68I | -0.92776 | 0.97925  | -1.98775 |
| R68K | -0.14143 | 0.58592  | -0.86029 |
| R68L | 1.47845  | 1.55914  | -1.45919 |
| R68M | 0.91599  | 2.36743  | -0.03327 |
| R68N | 3.17357  | 3.94107  | -0.43191 |
| R68P | 3.01091  | 1.0315   | -0.47517 |
| R68Q | 1.29038  | 1.82861  | 0.36321  |
| R68R | -0.62818 | 0.26584  | 0.01666  |
| R68S | 3.76125  | 3.47463  | 0.36503  |
| R68T | -0.01373 | 0.62601  | -0.30032 |
| R68V | -0.4869  | -0.2868  | -0.26015 |
| R68W | 1.8878   | -0.30779 | -0.9525  |
| R68Y | 2.87387  | -0.62553 | -0.9227  |
| R68X | -0.34739 | -0.74961 | -0.83972 |
| D69A | 0.45918  | 0.74222  | -1.3917  |
| D69C | -0.613   | -0.05577 | -1.75591 |
| D69D | NA       | NA       | NA       |
| D69E | 0.05754  | -0.12985 | -0.20317 |
| D69F | 0.34245  | 0.59178  | -1.41287 |
| D69G | 1.34379  | 1.50579  | -1.39207 |
| D69H | 0.23984  | 0.0337   | -1.24709 |
| D69I | -0.36904 | 0.45928  | -1.21902 |
| D69K | -0.33101 | 0.05     | -1.54989 |
| D69L | -0.36882 | 0.50567  | -1.23611 |
| D69M | -0.29038 | 1.28185  | -1.32155 |

|      |          |          |          |
|------|----------|----------|----------|
| D69N | 0.22101  | 0.05169  | 0.2302   |
| D69P | -1.0941  | -0.99667 | -2.72197 |
| D69Q | 0.1002   | -0.31031 | -1.0384  |
| D69R | -1.51523 | 0.10978  | -1.31301 |
| D69S | -1.16092 | -1.22821 | -0.70467 |
| D69T | -0.80569 | 0.12799  | -2.04069 |
| D69V | -0.61355 | 0.89637  | -1.56235 |
| D69W | -0.00105 | 0.0603   | -1.26479 |
| D69Y | 0.05066  | 0.20517  | -1.85725 |
| D69X | 0.05017  | -0.20795 | -0.72158 |
| Q70A | -1.51553 | -0.74135 | 1.64748  |
| Q70C | -0.79496 | -1.05573 | 1.35403  |
| Q70D | -0.51899 | -0.44575 | -0.10025 |
| Q70E | -0.37339 | -0.82056 | 0.78519  |
| Q70F | -1.85441 | -1.8139  | 1.04836  |
| Q70G | -1.02851 | -0.70425 | -1.85729 |
| Q70H | -0.49658 | -0.19033 | 0.80831  |
| Q70I | 0.77797  | -0.14791 | 2.12451  |
| Q70K | -0.63394 | 0.70106  | 0.0039   |
| Q70L | -0.36645 | -1.0142  | 2.48856  |
| Q70M | -0.27588 | -0.25341 | 3.26006  |
| Q70N | 0.89844  | 0.08553  | 2.64559  |
| Q70P | 2.99881  | -0.53252 | 0.7414   |
| Q70Q | NA       | NA       | NA       |
| Q70R | -0.38236 | -0.2255  | 0.46049  |
| Q70S | -0.71738 | -0.56902 | 1.6922   |
| Q70T | 0.04406  | -0.1861  | 2.30141  |
| Q70V | -0.32935 | 0.15664  | 1.78694  |
| Q70W | -0.58649 | -0.03544 | -1.03902 |
| Q70Y | 0.10901  | -0.20328 | 0.10648  |
| Q70X | -0.43066 | -0.62127 | -0.7664  |
| Y71A | -1.18739 | 0.28952  | -0.15648 |
| Y71C | 0.17921  | 0.0525   | -0.84478 |
| Y71D | 0.51408  | 0.07285  | 1.65103  |
| Y71E | -1.82577 | -0.55603 | 0.44994  |
| Y71F | -0.81944 | -0.79241 | -1.11529 |
| Y71G | 0.03086  | 0.29235  | -1.42357 |
| Y71H | -0.54953 | 0.21404  | 1.04387  |
| Y71I | -0.66741 | 0.62635  | 0.57439  |
| Y71K | -0.95533 | -0.03621 | -1.07982 |
| Y71L | -1.17121 | -0.73363 | -0.01811 |
| Y71M | -2.03602 | -1.63374 | 0.53204  |
| Y71N | -0.57468 | -1.0844  | -0.18437 |

|      |          |          |          |
|------|----------|----------|----------|
| Y71P | -0.69556 | 0.5566   | -1.65209 |
| Y71Q | -0.02704 | -1.43165 | -1.47223 |
| Y71R | -0.94091 | -1.28991 | -1.42346 |
| Y71S | -0.27969 | -0.1628  | -0.51999 |
| Y71T | -0.91097 | 0.26804  | 1.25802  |
| Y71V | -0.39857 | -0.95897 | 1.07559  |
| Y71W | 0.48758  | 0.05407  | -0.46197 |
| Y71Y | NA       | NA       | NA       |
| Y71X | 0.20614  | -0.68999 | -1.00783 |
| M72A | 0.14652  | -1.7229  | -0.06115 |
| M72C | 2.00415  | -0.74913 | 0.67815  |
| M72D | 2.18393  | 0.42819  | -0.57794 |
| M72E | 0.45396  | -0.77381 | -0.61864 |
| M72F | -0.30306 | 0.40559  | 1.52978  |
| M72G | 0.10168  | -0.98157 | -1.35224 |
| M72H | 0.32526  | 0.05453  | 1.0645   |
| M72I | 0.95789  | -0.3     | 0.39719  |
| M72K | 1.30598  | 1.10714  | -0.52846 |
| M72L | 2.30373  | 0.15053  | 0.7062   |
| M72M | NA       | NA       | NA       |
| M72N | -0.19941 | -0.36501 | -0.46528 |
| M72P | 0.77876  | -0.79604 | -1.80601 |
| M72Q | -0.27868 | 0.33296  | -0.57942 |
| M72R | 1.34865  | 0.17289  | -0.27289 |
| M72S | 1.85239  | 0.13922  | -0.00346 |
| M72T | 2.28845  | -1.29617 | -0.42319 |
| M72V | 1.83183  | 0.40361  | 0.35435  |
| M72W | 5.29518  | 1.42561  | 1.26957  |
| M72Y | -0.28625 | 0.97393  | 0.81019  |
| M72X | 0.34025  | -0.42051 | -0.87438 |
| R73A | -0.75621 | -0.19911 | 1.65618  |
| R73C | -1.10607 | -0.00017 | 1.74828  |
| R73D | 0.18982  | 1.17795  | 1.31476  |
| R73E | -0.50364 | -0.48043 | 1.2684   |
| R73F | 0.19433  | 0.4134   | -1.24379 |
| R73G | -2.66556 | -0.78031 | 0.98534  |
| R73H | -0.20151 | 0.09543  | -0.6636  |
| R73I | -0.2597  | 0.55972  | 0.12997  |
| R73K | 0.14257  | -0.03795 | 0.07175  |
| R73L | 0.00683  | -0.42689 | 0.08123  |
| R73M | -0.03165 | 0.04391  | 0.51766  |
| R73N | -1.15931 | -0.68847 | 1.50549  |
| R73P | 1.608    | -1.28781 | -0.02819 |

|      |          |          |          |
|------|----------|----------|----------|
| R73Q | 0.40915  | 0.60981  | 2.03884  |
| R73R | 0.35704  | 0.22894  | 0.25105  |
| R73S | -0.20375 | 0.5368   | 2.0945   |
| R73T | 1.10943  | 0.59176  | 1.82642  |
| R73V | -0.03345 | 0.31554  | 1.84262  |
| R73W | 0.42881  | 0.2111   | 0.15381  |
| R73Y | 0.38794  | -0.58929 | -0.54327 |
| R73X | 0.05416  | -0.00397 | -0.78381 |
| T74A | -0.28491 | -0.55838 | 1.19904  |
| T74C | -0.69639 | 0.15829  | 1.14089  |
| T74D | 0.12406  | 0.15444  | 0.2412   |
| T74E | -0.78553 | -0.13802 | 0.94921  |
| T74F | -0.24168 | 0.31566  | 1.67322  |
| T74G | -0.07672 | 0.26409  | 0.80081  |
| T74H | -0.74904 | -0.69855 | 0.95789  |
| T74I | -0.24334 | 0.13021  | 1.4623   |
| T74K | -0.73014 | -0.64996 | 1.39725  |
| T74L | -0.11298 | 0.13641  | 2.05756  |
| T74M | 0.55122  | 0.31841  | 1.5819   |
| T74N | -0.17736 | -0.02953 | 0.77414  |
| T74P | -0.00873 | -0.07093 | 1.07209  |
| T74Q | -1.45275 | -0.02475 | 1.00237  |
| T74R | -0.59438 | 0.41111  | 1.33136  |
| T74S | -0.06454 | -0.18197 | 0.5296   |
| T74T | NA       | NA       | NA       |
| T74V | -0.8173  | 0.06636  | 1.06908  |
| T74W | 0.73377  | 1.06779  | 1.1403   |
| T74Y | -0.19803 | -0.23276 | 1.6513   |
| T74X | 0.40189  | 0.59655  | -1.33739 |
| G75A | -0.11909 | 0.65798  | -0.85299 |
| G75C | -0.37827 | -0.42864 | -0.99109 |
| G75D | 1.25904  | -0.99636 | -1.53202 |
| G75E | -0.23797 | -1.18246 | -0.54743 |
| G75F | -0.06586 | -0.31383 | -2.15434 |
| G75G | NA       | NA       | NA       |
| G75H | -0.52389 | -0.22309 | -1.56408 |
| G75I | -0.86896 | -1.34617 | -0.32491 |
| G75K | -1.24463 | -1.24456 | -2.62588 |
| G75L | -0.68139 | -0.26634 | -0.96485 |
| G75M | -0.34694 | -0.78808 | -1.30184 |
| G75N | -0.98694 | -0.44121 | -0.86132 |
| G75P | -0.84376 | -0.39464 | 0.02861  |
| G75Q | -0.91449 | -1.01628 | 0.36193  |

|      |          |          |          |
|------|----------|----------|----------|
| G75R | -0.62352 | -0.05334 | -0.87434 |
| G75S | -0.47841 | -0.06041 | -1.1899  |
| G75T | -0.63531 | -1.01487 | -0.69097 |
| G75V | -0.09998 | 0.72483  | 0.18292  |
| G75W | 0.21794  | 0.54366  | -0.67539 |
| G75Y | -0.27471 | -0.22996 | -2.2946  |
| G75X | -0.73759 | -0.48888 | -0.74062 |
| E76A | -0.72795 | -0.00706 | -1.20513 |
| E76C | -1.19676 | -0.52699 | -0.72215 |
| E76D | -0.25463 | -0.57716 | -0.22504 |
| E76E | NA       | NA       | NA       |
| E76F | -0.91326 | -0.68515 | -0.48136 |
| E76G | -0.16011 | -0.32649 | -1.07652 |
| E76H | 0.40317  | 1.01065  | -0.85489 |
| E76I | -0.31774 | 0.10892  | -0.40371 |
| E76K | -0.85726 | -0.74762 | -0.97785 |
| E76L | -1.0985  | -0.88336 | -1.08219 |
| E76M | 0.17281  | -0.55783 | -0.69904 |
| E76N | -0.57373 | -0.28754 | -0.66298 |
| E76P | 1.25944  | 1.06504  | -0.54758 |
| E76Q | -0.50525 | -0.0902  | -0.74719 |
| E76R | -0.37797 | -0.24147 | -1.17906 |
| E76S | -0.33741 | -0.1975  | -0.83399 |
| E76T | 1.50435  | -0.54082 | 0.62323  |
| E76V | -1.25207 | -0.73452 | -0.51677 |
| E76W | -0.20865 | -1.01356 | -0.15315 |
| E76Y | 0.16356  | -0.26021 | -0.34595 |
| E76X | -0.18547 | -0.50124 | -0.62978 |
| G77A | -0.01421 | 0.30321  | 1.79217  |
| G77C | -0.29403 | 1.06893  | 1.15883  |
| G77D | -0.06196 | -0.89359 | -0.70812 |
| G77E | 0.17444  | 0.26661  | -0.5832  |
| G77F | 2.5631   | 2.86255  | 1.11223  |
| G77G | NA       | NA       | NA       |
| G77H | 1.04282  | 1.29213  | 0.82928  |
| G77I | 2.34438  | 1.68757  | 0.71685  |
| G77K | 0.75214  | 0.64129  | -0.52148 |
| G77L | 1.40316  | 0.96826  | 0.79129  |
| G77M | 1.15948  | 1.92427  | 1.2552   |
| G77N | 1.28473  | 0.39578  | 1.06675  |
| G77P | -0.46976 | -1.08791 | -0.83348 |
| G77Q | -0.16444 | 0.0322   | -0.14642 |
| G77R | 0.11015  | 0.31543  | -0.5272  |

|      |          |          |          |
|------|----------|----------|----------|
| G77S | 0.18054  | 1.36094  | 0.67459  |
| G77T | 2.01632  | 2.94104  | 0.59172  |
| G77V | 4.19469  | 4.37404  | 1.18985  |
| G77W | 0.67436  | 0.47329  | -0.2398  |
| G77Y | 3.60652  | 3.98042  | 1.05662  |
| G77X | -0.11957 | -0.20908 | -0.94111 |
| F78A | 1.2663   | -0.10602 | 0.39754  |
| F78C | 1.74662  | 0.42757  | 0.68375  |
| F78D | -0.47151 | 0.33479  | -0.19308 |
| F78E | 1.34262  | 0.25258  | -0.44761 |
| F78F | NA       | NA       | NA       |
| F78G | -0.44041 | 0.23992  | -0.23285 |
| F78H | 2.00791  | 0.02504  | 1.11657  |
| F78I | 1.32464  | 0.62622  | 0.05297  |
| F78K | 0.53979  | -0.2079  | -0.43204 |
| F78L | -0.05928 | -1.04585 | -0.1054  |
| F78M | 1.0065   | 0.94903  | 0.3179   |
| F78N | -0.49176 | -0.43382 | 0.44333  |
| F78P | 0.05933  | 0.32406  | -0.58209 |
| F78Q | 0.69482  | 0.17303  | -0.40548 |
| F78R | 0.52156  | 0.73315  | -0.91698 |
| F78S | 0.49716  | 0.53064  | 0.33102  |
| F78T | 0.43743  | -0.5333  | 0.75159  |
| F78V | 0.88125  | -0.69456 | 0.53817  |
| F78W | 0.11681  | -0.2961  | 0.46982  |
| F78Y | -0.63196 | -0.51607 | 0.36795  |
| F78X | -0.72097 | -0.66552 | -0.82622 |
| L79A | -0.54694 | -0.02901 | 0.58519  |
| L79C | 0.19084  | -0.15165 | 0.52837  |
| L79D | 0.64021  | 0.48798  | -0.88693 |
| L79E | -0.41736 | 0.0475   | -0.24896 |
| L79F | -0.78387 | -0.87323 | 0.80875  |
| L79G | 0.43975  | 0.07379  | 0.39617  |
| L79H | -0.92412 | 0.29604  | -0.20276 |
| L79I | -0.54908 | -0.07921 | 0.1534   |
| L79K | -0.07994 | -0.06146 | -0.54248 |
| L79L | -0.05437 | 0.06292  | -0.13068 |
| L79M | -0.38034 | 0.17527  | -0.12602 |
| L79N | -0.77652 | -0.25889 | -0.2344  |
| L79P | 0.07555  | 0.50519  | -0.57577 |
| L79Q | -0.65506 | -0.39822 | 0.26951  |
| L79R | 0.60832  | -0.17122 | -0.87559 |
| L79S | -0.98019 | -0.29753 | 0.14706  |

|      |          |          |          |
|------|----------|----------|----------|
| L79T | -0.18694 | 0.75471  | 0.25891  |
| L79V | -0.03645 | 0.71564  | 0.34962  |
| L79W | 0.53343  | 0.90242  | 1.27647  |
| L79Y | -0.39034 | -0.08369 | 1.18522  |
| L79X | 0.26938  | 0.23195  | -1.01773 |
| C80A | -0.83722 | -0.48012 | -0.05715 |
| C80C | NA       | NA       | NA       |
| C80D | -0.97065 | -0.66725 | -0.58328 |
| C80E | -0.09618 | 0.60434  | -0.14245 |
| C80F | 0.00321  | -0.14716 | 0.11279  |
| C80G | 0.13871  | 0.56353  | -0.03314 |
| C80H | -0.98495 | -0.58428 | -0.41878 |
| C80I | 0.4419   | 0.4629   | 0.32644  |
| C80K | -0.899   | -0.64725 | 0.08452  |
| C80L | 0.20911  | 0.59102  | -0.03101 |
| C80M | -0.27519 | 0.13716  | 0.31383  |
| C80N | -0.69848 | -0.99203 | -0.58641 |
| C80P | -1.35607 | -0.22542 | -0.24103 |
| C80Q | -0.97427 | -0.87579 | -0.29389 |
| C80R | 0.75975  | 0.6648   | -0.57276 |
| C80S | -1.04368 | -0.34106 | -0.14546 |
| C80T | -0.30492 | -0.94823 | -0.01084 |
| C80V | 0.02464  | 0.1886   | 0.33677  |
| C80W | -0.34692 | 0.45595  | -0.67248 |
| C80Y | 0.80707  | 0.20685  | -0.08916 |
| C80X | 0.97588  | 0.49502  | -0.98749 |
| V81A | -0.79709 | -0.29484 | 0.10284  |
| V81C | -0.34238 | -0.22346 | 0.00256  |
| V81D | 0.26695  | -0.15263 | -0.86701 |
| V81E | -0.7794  | -1.21353 | -0.7191  |
| V81F | 0.51805  | 1.95362  | 0.46773  |
| V81G | -1.27885 | -0.31758 | 0.02249  |
| V81H | -0.07405 | -0.56734 | -0.90945 |
| V81I | 0.45358  | -0.25068 | 0.48943  |
| V81K | -0.29022 | 0.40066  | -0.84886 |
| V81L | 0.1991   | -0.77706 | -0.19207 |
| V81M | -0.4562  | -0.17039 | 0.10735  |
| V81N | -1.27367 | -1.08388 | 0.28346  |
| V81P | -0.0015  | -0.09884 | -0.51722 |
| V81Q | -0.49878 | 0.18961  | -0.29533 |
| V81R | -0.07068 | 0.32302  | -0.84914 |
| V81S | -0.57683 | -0.36461 | 0.72016  |
| V81T | -1.05755 | -1.03207 | 0.40628  |

|      |          |          |          |
|------|----------|----------|----------|
| V81V | NA       | NA       | NA       |
| V81W | 0.29405  | -0.14928 | -0.70082 |
| V81Y | -0.90039 | -0.13343 | -1.02889 |
| V81X | 0.71368  | -0.06133 | -0.87317 |
| F82A | -0.66112 | 0.00638  | -0.18015 |
| F82C | -1.50273 | -0.55802 | -0.34957 |
| F82D | -0.22629 | -0.364   | -0.84458 |
| F82E | -1.02491 | -0.33877 | -0.78874 |
| F82F | NA       | NA       | NA       |
| F82G | -0.19943 | 0.52952  | 0.67932  |
| F82H | -0.91238 | -0.12768 | 0.00123  |
| F82I | -0.20518 | -0.3738  | 0.42372  |
| F82K | -0.51526 | -0.71167 | -0.68962 |
| F82L | 1.24738  | 1.50229  | -0.04314 |
| F82M | -0.80303 | -0.55714 | -0.21728 |
| F82N | -0.44655 | -0.77906 | -1.24317 |
| F82P | 0.11296  | -0.40564 | -0.63892 |
| F82Q | 0.1932   | 0.24497  | -0.97093 |
| F82R | -1.02778 | -1.24595 | -1.48461 |
| F82S | -0.37806 | -0.58044 | -0.0329  |
| F82T | -0.54555 | -0.15521 | -0.15061 |
| F82V | -0.0253  | -0.60489 | 0.04044  |
| F82W | -0.67922 | -0.44222 | 0.15226  |
| F82Y | -0.19595 | 0.22601  | 0.28014  |
| F82X | 0.11279  | 0.11065  | -0.94267 |
| A83A | NA       | NA       | NA       |
| A83C | -0.13609 | -0.72504 | 0.37728  |
| A83D | -0.08589 | -0.25248 | -0.44266 |
| A83E | -0.7145  | 0.20936  | -0.37942 |
| A83F | 0.04002  | -0.46217 | -0.76915 |
| A83G | 0.16595  | -0.27788 | 1.45263  |
| A83H | 0.79856  | 2.25205  | 2.52012  |
| A83I | -0.19314 | 0.36022  | 1.45046  |
| A83K | 0.36734  | 0.62785  | 1.7179   |
| A83L | 0.31057  | 0.68182  | -0.03539 |
| A83M | -0.91993 | -0.06193 | -0.80562 |
| A83N | -0.42356 | 1.28262  | 2.19999  |
| A83P | -0.97522 | -0.25482 | -0.92142 |
| A83Q | -0.85526 | -0.23846 | 1.77491  |
| A83R | -0.30848 | -0.38653 | 1.44772  |
| A83S | -0.49585 | 0.18141  | 0.52811  |
| A83T | -0.65673 | -0.02651 | 1.57056  |
| A83V | 1.58477  | 2.51855  | 1.81057  |



|      |          |          |          |
|------|----------|----------|----------|
| A83W | 0.20634  | -1.48433 | -1.23076 |
| A83Y | -0.29455 | 0.07774  | -0.5899  |
| A83X | -0.42064 | -1.18727 | -0.41568 |
| I84A | -0.32755 | -0.07301 | 1.76407  |
| I84C | -0.14143 | -0.27565 | 1.47284  |
| I84D | -0.91882 | -0.08135 | 0.7024   |
| I84E | -0.74335 | -0.57681 | 1.01306  |
| I84F | 0.98336  | 1.18472  | 1.38021  |
| I84G | -0.75131 | -0.12564 | 1.49665  |
| I84H | -0.01892 | -0.31287 | 1.369    |
| I84I | NA       | NA       | NA       |
| I84K | -0.85388 | -0.26965 | 0.63343  |
| I84L | -1.14327 | -0.67821 | -0.40119 |
| I84M | 0.7282   | 1.09608  | 1.10059  |
| I84N | -0.22898 | 0.00314  | 0.4366   |
| I84P | -0.66377 | -0.63733 | 2.10962  |
| I84Q | 0.56016  | 1.57533  | 0.78419  |
| I84R | 0.11016  | -0.38101 | 0.38717  |
| I84S | -0.08292 | 0.92501  | 1.07427  |
| I84T | -0.87341 | -0.14159 | 0.91671  |
| I84V | -0.36678 | -0.47357 | -0.0385  |
| I84W | -0.36922 | -0.13634 | 1.51464  |
| I84Y | 0.7841   | -0.71533 | 1.78487  |
| I84X | -0.35792 | -0.84641 | -0.47007 |
| N85A | -1.10444 | -0.73395 | 0.92044  |
| N85C | -0.04527 | 0.90983  | 0.69124  |
| N85D | -1.3547  | -0.24418 | -0.38685 |
| N85E | 0.88901  | 0.40336  | -0.52255 |
| N85F | -1.24534 | -0.28105 | 1.39234  |
| N85G | -0.78636 | 0.1889   | 1.742    |
| N85H | 1.25434  | 1.1969   | 2.07832  |
| N85I | 0.07902  | 0.28407  | 0.76705  |
| N85K | 0.01272  | 0.62986  | 1.05914  |
| N85L | -1.2546  | -0.79369 | 0.98849  |
| N85M | -0.33254 | -0.24372 | 1.70835  |
| N85N | NA       | NA       | NA       |
| N85P | -0.7259  | 0.20204  | 0.72892  |
| N85Q | -0.48587 | 0.28505  | 0.99855  |
| N85R | -1.09573 | -0.71077 | 0.58529  |
| N85S | 0.18833  | -0.17754 | 0.43755  |
| N85T | -0.87111 | -0.02229 | 0.38225  |
| N85V | -0.23889 | 0.57353  | 0.48423  |
| N85W | -0.1444  | 0.51175  | -0.0217  |

|      |          |          |          |
|------|----------|----------|----------|
| N85Y | -1.17618 | -1.05958 | 2.06617  |
| N85X | 0.15166  | 0.09552  | -0.79048 |
| N86A | -0.29489 | -0.05577 | -0.10826 |
| N86C | -1.82901 | -1.48042 | -0.56063 |
| N86D | -0.48526 | 0.65663  | -0.84385 |
| N86E | -0.29335 | -0.90526 | -0.60807 |
| N86F | -0.57455 | -0.31821 | -0.91971 |
| N86G | -0.7214  | 0.57256  | -0.17611 |
| N86H | -1.26412 | 0.29601  | -0.27217 |
| N86I | 0.02233  | -0.0682  | -0.78929 |
| N86K | -0.12406 | 0.07177  | 0.20738  |
| N86L | -1.11204 | -0.13423 | -1.1305  |
| N86M | -0.68505 | -0.71764 | -1.38771 |
| N86N | NA       | NA       | NA       |
| N86P | -0.06994 | -0.56127 | -1.0245  |
| N86Q | -0.53754 | -0.0635  | -0.12641 |
| N86R | -0.79541 | 0.87041  | -0.18828 |
| N86S | 0.15528  | 0.0349   | 0.01096  |
| N86T | 0.13456  | 0.43087  | 0.02542  |
| N86V | -0.31385 | 0.29111  | -0.26724 |
| N86W | -0.54565 | 0.12327  | -1.31273 |
| N86Y | -1.33559 | -0.16297 | -0.88298 |
| N86X | -0.24025 | -0.81411 | -0.84435 |
| T87A | 0.34776  | -0.02814 | -0.1353  |
| T87C | 0.45766  | 0.06198  | -0.29063 |
| T87D | -0.25015 | -1.32821 | 0.54142  |
| T87E | -0.89979 | -0.42361 | 0.06527  |
| T87F | -0.07116 | -0.00381 | -0.21833 |
| T87G | -0.67888 | 0.87088  | -0.33529 |
| T87H | -1.5637  | -1.90526 | 0.08503  |
| T87I | -0.97404 | -0.41413 | -0.0502  |
| T87K | -1.26972 | -0.64909 | 0.06598  |
| T87L | -0.60345 | -1.49643 | 0.05023  |
| T87M | 0.24981  | 0.13352  | -0.04591 |
| T87N | -0.31024 | 0.39843  | 0.22786  |
| T87P | 0.24396  | 0.32329  | 0.06079  |
| T87Q | -1.01418 | 0.44892  | 0.00793  |
| T87R | -0.20382 | -1.74395 | -0.76496 |
| T87S | -1.14159 | -0.0676  | -0.24303 |
| T87T | NA       | NA       | NA       |
| T87V | -0.61475 | -0.36008 | 0.04733  |
| T87W | -0.43915 | -0.04809 | -0.59889 |
| T87Y | -0.9115  | -0.68542 | 0.02413  |

|      |          |          |          |
|------|----------|----------|----------|
| T87X | -0.10818 | -0.56167 | -0.98804 |
| K88A | -0.13304 | -1.18568 | 0.08329  |
| K88C | -0.38706 | 0.7594   | -0.56292 |
| K88D | 0.09627  | -0.28714 | 0.68835  |
| K88E | -4.14742 | -1.6651  | 0.66357  |
| K88F | -1.01162 | -0.14722 | 0.25519  |
| K88G | -0.66279 | 0.95379  | -0.16726 |
| K88H | -0.15024 | -0.75084 | -0.10853 |
| K88I | 0.74076  | 1.4288   | 0.61555  |
| K88K | NA       | NA       | NA       |
| K88L | -0.75424 | -0.30021 | 0.16069  |
| K88M | 0.5857   | -0.86148 | 0.23264  |
| K88N | -0.05409 | 0.03209  | 0.25544  |
| K88P | -1.86396 | -1.3597  | 0.60897  |
| K88Q | -0.95541 | -0.27022 | -0.06165 |
| K88R | -1.45261 | -0.09604 | 0.26097  |
| K88S | -1.162   | -1.12496 | 0.15812  |
| K88T | -1.0801  | -0.60973 | 0.28149  |
| K88V | -0.34573 | -0.35166 | -0.37452 |
| K88W | 0.36412  | 0.46973  | 0.73821  |
| K88Y | -0.04263 | 0.68277  | 0.13292  |
| K88X | -1.2081  | -1.88022 | -0.38811 |
| S89A | -0.63739 | -0.22083 | 0.64064  |
| S89C | 0.45165  | -0.21419 | -0.14461 |
| S89D | -1.06088 | -0.25184 | -1.20556 |
| S89E | 0.01268  | -0.20435 | -0.1415  |
| S89F | -0.27905 | 0.16349  | -0.26473 |
| S89G | -0.64829 | -1.46566 | 0.3911   |
| S89H | -0.32957 | -0.05738 | 0.23497  |
| S89I | -0.87316 | -1.25925 | -0.48519 |
| S89K | -0.83864 | -0.39611 | 0.4974   |
| S89L | -0.41431 | 0.09213  | -0.46078 |
| S89M | -0.80977 | -1.19238 | -0.37522 |
| S89N | -0.9226  | 0.21502  | -0.04653 |
| S89P | -0.7977  | -0.83083 | 0.26263  |
| S89Q | -0.49205 | -2.17934 | -0.24445 |
| S89R | -0.36082 | 0.34025  | -0.33163 |
| S89S | -0.90894 | 0.30279  | -0.20974 |
| S89T | -0.83338 | -3.02137 | -0.24634 |
| S89V | 0.2172   | 0.71667  | -0.58639 |
| S89W | -0.17893 | 0.05827  | 0.78189  |
| S89Y | -0.93964 | -0.44278 | 0.34765  |
| S89X | -0.34649 | -0.31426 | -0.58629 |

|      |          |          |          |
|------|----------|----------|----------|
| F90A | -2.74243 | -0.55771 | -0.36756 |
| F90C | 0.62884  | 0.51056  | -0.3315  |
| F90D | -0.23802 | -0.2134  | -0.90788 |
| F90E | 0.01727  | 0.15129  | 0.34451  |
| F90F | NA       | NA       | NA       |
| F90G | -0.7201  | -0.89668 | -0.19691 |
| F90H | -3.8391  | -0.21375 | -0.05707 |
| F90I | -0.5744  | -0.35358 | -0.03833 |
| F90K | NA       | NA       | NA       |
| F90L | -3.08616 | -2.75493 | -0.8679  |
| F90M | -1.61304 | -0.61332 | 0.05546  |
| F90N | 0.21847  | -0.00442 | -0.21415 |
| F90P | -0.25791 | 0.57914  | -1.04337 |
| F90Q | -0.94284 | -3.47385 | -0.30102 |
| F90R | 0.26944  | -0.85135 | -0.89625 |
| F90S | -3.6751  | -1.91746 | -0.91583 |
| F90T | 0.15505  | -0.58084 | -0.0658  |
| F90V | 0.01603  | -1.24451 | -0.05202 |
| F90W | 0.47502  | 0.39297  | 0.71859  |
| F90Y | -0.93834 | 0.95354  | 0.38613  |
| F90X | -0.60079 | -1.41645 | -1.29278 |
| E91A | -1.09167 | -0.82383 | -0.05119 |
| E91C | -1.15209 | 0.2491   | -0.17978 |
| E91D | -0.12028 | 0.5794   | 0.04412  |
| E91E | NA       | NA       | NA       |
| E91F | -0.25055 | 0.19172  | -0.43727 |
| E91G | -0.76086 | 0.29622  | 0.02619  |
| E91H | -1.09781 | -2.25415 | -0.15394 |
| E91I | -1.60371 | -2.29077 | -0.4062  |
| E91K | -1.5761  | -0.27538 | -0.51323 |
| E91L | -0.46452 | 0.0366   | -0.17559 |
| E91M | -0.56361 | -1.68163 | 0.30945  |
| E91N | -1.08311 | -2.25398 | -0.08909 |
| E91P | -0.11158 | 1.10898  | -0.40062 |
| E91Q | 0.49396  | 0.57286  | -0.05137 |
| E91R | -0.75254 | -0.39763 | -0.41429 |
| E91S | -2.63116 | -1.71785 | -0.3901  |
| E91T | -0.76865 | 0.67086  | 0.13814  |
| E91V | 0.47031  | 0.76035  | -0.13786 |
| E91W | -0.83412 | -0.6191  | -0.14955 |
| E91Y | -0.97724 | -1.28747 | -0.27181 |
| E91X | 0.06684  | -0.19696 | -0.83259 |
| D92A | 0.48616  | -0.4706  | -0.04752 |

|      |          |          |          |
|------|----------|----------|----------|
| D92C | 0.70819  | 0.66989  | -0.29535 |
| D92D | NA       | NA       | NA       |
| D92E | -0.89391 | -0.2535  | 0.09958  |
| D92F | 0.64533  | -0.30119 | -0.45845 |
| D92G | 0.10803  | -0.66104 | 0.1154   |
| D92H | 0.40153  | 0.46524  | 0.23143  |
| D92I | 1.30974  | -0.26994 | -0.02944 |
| D92K | 2.98077  | 0.72616  | -0.66991 |
| D92L | 2.56132  | 0.28747  | 0.08804  |
| D92M | 1.56879  | -0.02739 | 0.22606  |
| D92N | 0.12326  | -0.30549 | -0.4272  |
| D92P | 1.70269  | 0.19659  | 0.22506  |
| D92Q | -0.42331 | -0.80106 | 0.16688  |
| D92R | 2.37107  | 0.28796  | -0.66002 |
| D92S | 0.74111  | -0.10249 | 0.11655  |
| D92T | 0.3612   | -0.21759 | -0.19746 |
| D92V | 0.60307  | -0.49336 | -0.04366 |
| D92W | -0.34669 | -0.56486 | -1.18729 |
| D92Y | 0.46211  | 0.35052  | -0.68187 |
| D92X | -0.52023 | -0.07813 | -0.77747 |
| I93A | -0.01577 | -1.10438 | -0.29903 |
| I93C | -0.73248 | 0.26074  | 0.24941  |
| I93D | 0.17039  | 0.99853  | -0.77376 |
| I93E | 0.33555  | -0.97698 | -0.69839 |
| I93F | -0.29959 | 0.65706  | -0.1849  |
| I93G | -0.98423 | -1.10092 | -0.19615 |
| I93H | -1.29266 | -2.2091  | -0.92366 |
| I93I | NA       | NA       | NA       |
| I93K | 0.15123  | 0.21188  | -0.73285 |
| I93L | -0.40181 | -0.29384 | 0.69018  |
| I93M | 0.2046   | 1.31358  | 0.72855  |
| I93N | 1.37852  | 0.44446  | -0.40838 |
| I93P | -0.09979 | 0.26512  | -0.63327 |
| I93Q | -0.36638 | 0.82309  | 0.20746  |
| I93R | 0.49838  | 0.69024  | -0.93345 |
| I93S | -0.19356 | 0.46192  | -0.36219 |
| I93T | -0.12708 | 0.50947  | 0.11205  |
| I93V | -0.4452  | 0.02205  | -0.46702 |
| I93W | 0.14914  | -0.65575 | -0.59997 |
| I93Y | -0.31735 | -0.18976 | -0.5695  |
| I93X | 0.35569  | 0.41266  | -0.43034 |
| H94A | -0.53958 | -0.17795 | -0.02825 |
| H94C | -0.26038 | -0.88832 | 0.01124  |

|      |          |          |          |
|------|----------|----------|----------|
| H94D | -0.82654 | 0.05521  | 0.29761  |
| H94E | -0.75968 | 0.015    | 0.56338  |
| H94F | -0.71514 | -0.39847 | 0.91782  |
| H94G | -0.42063 | 0.07016  | 0.06715  |
| H94H | NA       | NA       | NA       |
| H94I | 0.77654  | -0.97707 | 0.83473  |
| H94K | -0.08208 | -0.38884 | -0.53895 |
| H94L | 0.01284  | 0.95403  | 0.57221  |
| H94M | -0.24673 | 1.11182  | 0.7541   |
| H94N | -0.2174  | 0.62708  | -0.25702 |
| H94P | 2.11847  | -0.27069 | 0.00121  |
| H94Q | -0.10801 | 0.69582  | 0.07556  |
| H94R | 0.15375  | 0.44634  | -0.32406 |
| H94S | -0.07017 | 0.68979  | 0.00994  |
| H94T | 0.07749  | 0.11436  | 0.01943  |
| H94V | -0.85387 | -0.62798 | 0.03326  |
| H94W | -0.51186 | -1.42921 | 0.74352  |
| H94Y | 0.16156  | -0.48036 | 0.40008  |
| H94X | -0.24958 | -0.97835 | -0.76669 |
| H95A | 2.941    | -0.58895 | 0.07018  |
| H95C | 3.17605  | -0.1412  | 0.24306  |
| H95D | 4.73715  | -0.43884 | 1.0077   |
| H95E | 4.03688  | -0.34673 | 0.72606  |
| H95F | 1.66871  | -0.0059  | -0.17361 |
| H95G | 4.4604   | 0.19004  | 0.56594  |
| H95H | NA       | NA       | NA       |
| H95I | 1.78708  | -0.36789 | -0.51757 |
| H95K | 1.82345  | 0.43327  | -0.70196 |
| H95L | 2.62187  | -0.44472 | -0.09789 |
| H95M | 4.15005  | 1.31265  | 0.71603  |
| H95N | 3.22913  | -0.62773 | 0.04233  |
| H95P | 3.9644   | 0.06664  | 0.25881  |
| H95Q | 3.2913   | 0.50564  | 0.20543  |
| H95R | 2.3326   | 0.26213  | -0.15519 |
| H95S | 3.64529  | 1.38086  | -0.03738 |
| H95T | 2.83858  | 0.1012   | -0.34265 |
| H95V | 2.80512  | 0.94577  | -0.17734 |
| H95W | 1.99089  | 1.44642  | 0.62494  |
| H95Y | 2.69147  | 1.01219  | 0.30568  |
| H95X | 0.82343  | 1.03319  | -0.79427 |
| Y96A | 2.42475  | 2.47172  | -0.54909 |
| Y96C | 1.74261  | 1.3756   | -0.978   |
| Y96D | 3.33037  | 3.44021  | 0.02889  |

|      |          |          |          |
|------|----------|----------|----------|
| Y96E | 1.03562  | 1.4002   | -1.35879 |
| Y96F | 0.89869  | 0.24662  | 0.1723   |
| Y96G | 1.41074  | 1.56914  | -0.68978 |
| Y96H | 0.67785  | 0.29146  | -1.06282 |
| Y96I | 1.34577  | 2.05093  | -1.03103 |
| Y96K | 2.04367  | 2.36442  | -0.86944 |
| Y96L | 3.43988  | 4.1063   | 0.01424  |
| Y96M | 2.90369  | 4.00067  | -0.04645 |
| Y96N | 1.71421  | 1.73189  | -0.91672 |
| Y96P | 0.14199  | 0.57646  | -1.24826 |
| Y96Q | 2.1639   | 2.56549  | -0.46115 |
| Y96R | 1.93745  | 2.38458  | -0.66763 |
| Y96S | 2.33549  | 2.66077  | -0.35033 |
| Y96T | 2.89703  | 3.62621  | -0.30425 |
| Y96V | 2.01042  | 2.26089  | -0.51389 |
| Y96W | 1.92867  | 3.22005  | 0.2716   |
| Y96Y | NA       | NA       | NA       |
| Y96X | 0.37782  | -0.66025 | -0.7336  |
| R97A | -1.25236 | -0.52544 | 0.0367   |
| R97C | -0.58483 | -0.08208 | 0.21643  |
| R97D | -0.50174 | -0.61687 | 0.02185  |
| R97E | -1.4813  | -0.43356 | 0.58775  |
| R97F | -0.0028  | -1.00559 | 0.64547  |
| R97G | 0.06104  | 0.11505  | 0.23086  |
| R97H | -0.79387 | 0.29988  | 0.44182  |
| R97I | 0.89608  | 0.37407  | -0.30217 |
| R97K | -0.96787 | -0.28398 | 0.0274   |
| R97L | 0.52572  | -0.00038 | 0.37762  |
| R97M | -0.45733 | 0.14502  | -0.34319 |
| R97N | 0.0602   | 0.59558  | 0.45915  |
| R97P | 2.67462  | 0.55534  | 0.48066  |
| R97Q | -0.54892 | 0.13413  | 0.78388  |
| R97R | 0.7419   | 0.58338  | 0.16778  |
| R97S | -0.02562 | -0.14646 | 0.12834  |
| R97T | -0.24585 | 0.21184  | 0.27282  |
| R97V | -0.68188 | -1.49447 | 0.44874  |
| R97W | -0.975   | -1.27007 | 0.57675  |
| R97Y | 0.55093  | 0.36146  | 1.02562  |
| R97X | -0.03798 | 0.54006  | -0.36049 |
| E98A | NA       | NA       | NA       |
| E98C | NA       | NA       | NA       |
| E98D | NA       | NA       | NA       |
| E98E | NA       | NA       | NA       |

|       |          |          |          |
|-------|----------|----------|----------|
| E98F  | NA       | NA       | NA       |
| E98G  | NA       | NA       | NA       |
| E98H  | NA       | NA       | NA       |
| E98I  | NA       | NA       | NA       |
| E98K  | NA       | NA       | NA       |
| E98L  | NA       | NA       | NA       |
| E98M  | NA       | NA       | NA       |
| E98N  | NA       | NA       | NA       |
| E98P  | NA       | NA       | NA       |
| E98Q  | NA       | NA       | NA       |
| E98R  | NA       | NA       | NA       |
| E98S  | NA       | NA       | NA       |
| E98T  | NA       | NA       | NA       |
| E98V  | NA       | NA       | NA       |
| E98W  | NA       | NA       | NA       |
| E98Y  | NA       | NA       | NA       |
| E98X  | NA       | NA       | NA       |
| Q99A  | 2.19058  | 0.19602  | 0.6018   |
| Q99C  | -0.50266 | 0.64055  | 0.54561  |
| Q99D  | 3.82622  | 4.35295  | 0.21573  |
| Q99E  | 0.2292   | 0.06684  | -1.41746 |
| Q99F  | 4.30275  | 0.53566  | 1.0393   |
| Q99G  | 2.76124  | 0.3274   | -0.01561 |
| Q99H  | -0.12826 | 0.02637  | 0.12623  |
| Q99I  | 2.04685  | 0.66535  | 0.18619  |
| Q99K  | 1.84697  | -0.3655  | -0.66471 |
| Q99L  | 1.01796  | 0.07062  | 0.83444  |
| Q99M  | 1.19838  | 0.30863  | 0.71565  |
| Q99N  | 0.85858  | 1.04649  | 0.83032  |
| Q99P  | 1.29243  | 0.17539  | -0.59855 |
| Q99Q  | NA       | NA       | NA       |
| Q99R  | 1.45588  | 0.61153  | -0.91396 |
| Q99S  | 1.99807  | 1.76149  | 0.5079   |
| Q99T  | 1.12874  | 1.41134  | -0.50037 |
| Q99V  | 1.17947  | -0.0544  | -0.23239 |
| Q99W  | 6.03734  | 3.92598  | 2.25802  |
| Q99Y  | 4.75478  | 0.8579   | 1.04991  |
| Q99X  | -1.17737 | -1.03979 | -0.96407 |
| I100A | -0.68345 | -0.16562 | 0.60055  |
| I100C | 0.59627  | 0.60284  | -0.18521 |
| I100D | -0.62166 | -0.90289 | -1.01175 |
| I100E | -0.18563 | -0.12202 | -1.0621  |
| I100F | -0.77721 | 0.83305  | -0.1045  |



|       |          |          |          |
|-------|----------|----------|----------|
| I100G | -0.78213 | 0.15668  | 0.0357   |
| I100H | 0.90203  | 0.7617   | -0.73691 |
| I100I | NA       | NA       | NA       |
| I100K | 0.05084  | 0.31709  | -1.13666 |
| I100L | -0.45677 | -0.43602 | 0.40049  |
| I100M | -0.26671 | 0.33645  | 1.16685  |
| I100N | 0.05919  | 0.8358   | -0.51942 |
| I100P | 0.10287  | 0.67065  | -0.79828 |
| I100Q | -1.39642 | 0.38519  | -1.03313 |
| I100R | 0.38835  | 0.58614  | -0.61709 |
| I100S | 0.08392  | -0.92549 | 0.13458  |
| I100T | -0.9468  | -0.59499 | -0.2881  |
| I100V | 0.54841  | 0.61119  | -0.28223 |
| I100W | -0.07054 | 0.42538  | -0.39453 |
| I100Y | 0.12765  | -0.20579 | -0.24432 |
| I100X | 0.05263  | -0.32876 | -0.61396 |
| K101A | -0.91307 | -1.40631 | 0.04165  |
| K101C | -0.10808 | 0.42871  | -0.05818 |
| K101D | -0.88738 | 0.1167   | -0.14629 |
| K101E | -1.07045 | -1.27626 | 0.25939  |
| K101F | 0.16242  | 1.06142  | -0.05093 |
| K101G | -0.60914 | -0.35052 | 0.29484  |
| K101H | 1.42642  | 0.72595  | -0.19967 |
| K101I | -0.00965 | -0.452   | 0.10125  |
| K101K | NA       | NA       | NA       |
| K101L | -0.56357 | -0.09406 | -0.08897 |
| K101M | 0.51381  | 0.27886  | -0.13022 |
| K101N | -0.23832 | -0.68591 | 0.08622  |
| K101P | 0.29124  | -1.35332 | -0.8561  |
| K101Q | -0.1035  | 0.56595  | -0.36349 |
| K101R | -1.80744 | -0.28596 | -0.16041 |
| K101S | -0.82225 | -0.64089 | -0.18006 |
| K101T | -0.79192 | -2.91297 | 0.07908  |
| K101V | -0.66343 | -0.28121 | -0.27603 |
| K101W | -0.14853 | -0.38097 | 0.36553  |
| K101Y | 0.09083  | -0.85403 | 0.39489  |
| K101X | 0.28956  | 0.23474  | -0.76554 |
| R102A | 1.57177  | 0.7806   | -0.76128 |
| R102C | 1.27937  | 0.22386  | -0.7139  |
| R102D | 0.94294  | 0.12217  | -0.09555 |
| R102E | 1.46806  | -0.29491 | 0.07084  |
| R102F | 1.02048  | -0.15348 | -0.70299 |
| R102G | 1.58621  | 0.1766   | 0.14213  |

|       |          |          |          |
|-------|----------|----------|----------|
| R102H | 1.487    | 0.2357   | -0.7504  |
| R102I | 1.4255   | 0.9341   | -0.35385 |
| R102K | 0.58933  | -1.02183 | -0.34634 |
| R102L | 1.1183   | -0.23242 | -0.65004 |
| R102M | 1.59186  | -0.04225 | -0.3217  |
| R102N | 0.86463  | 0.00192  | -0.73633 |
| R102P | 0.56557  | 0.2915   | -1.09234 |
| R102Q | 0.97145  | -1.25613 | -0.63247 |
| R102R | 1.68097  | 1.32137  | 0.19591  |
| R102S | 0.35892  | 0.021    | -1.00612 |
| R102T | 1.70469  | 0.73674  | -0.65187 |
| R102V | 1.01882  | -0.5184  | -0.73742 |
| R102W | 0.64433  | -0.3481  | -0.79771 |
| R102Y | 0.90839  | -0.5568  | -0.21363 |
| R102X | -0.00918 | 0.0859   | -0.98707 |
| V103A | 0.73151  | -0.34577 | -0.15613 |
| V103C | 0.64496  | 0.92606  | -0.55876 |
| V103D | 0.81307  | -0.72667 | -0.87723 |
| V103E | 2.09564  | 0.27392  | 0.09172  |
| V103F | 0.91664  | 0.64482  | -0.89868 |
| V103G | 0.03818  | -0.55367 | -0.75343 |
| V103H | 1.45217  | 0.36172  | -0.37931 |
| V103I | -0.33495 | -0.06866 | -0.5398  |
| V103K | 0.96669  | 0.0429   | -0.89578 |
| V103L | 0.1567   | -1.05738 | -1.06069 |
| V103M | 1.04067  | 0.65815  | -0.75285 |
| V103N | 1.14606  | 0.18081  | -0.37969 |
| V103P | 0.61548  | -2.4564  | -1.14334 |
| V103Q | 2.88857  | 1.45346  | -0.0699  |
| V103R | 0.92215  | 1.17183  | -0.66428 |
| V103S | 0.46511  | -0.90515 | -0.77619 |
| V103T | 0.79455  | -0.24588 | -0.01959 |
| V103V | NA       | NA       | NA       |
| V103W | 1.92554  | 1.08346  | -0.03141 |
| V103Y | 0.69956  | -0.97479 | -1.11445 |
| V103X | 0.07846  | -0.39982 | -1.03069 |
| K104A | -0.84243 | -1.37845 | 0.83396  |
| K104C | -0.54062 | -0.36164 | 1.12177  |
| K104D | 0.594    | 0.17452  | -0.88213 |
| K104E | -0.83915 | 0.03327  | -0.20853 |
| K104F | -0.77739 | -1.08594 | 0.37551  |
| K104G | -0.02377 | 0.36913  | -0.08622 |
| K104H | 0.31576  | -0.66431 | 0.38597  |

|       |          |          |          |
|-------|----------|----------|----------|
| K104I | -0.95476 | -2.08227 | 0.46521  |
| K104K | NA       | NA       | NA       |
| K104L | -0.04093 | 0.54474  | 0.44506  |
| K104M | 0.19669  | -0.15899 | 1.04185  |
| K104N | -0.1028  | -0.1577  | 0.17602  |
| K104P | 0.59219  | -0.58962 | -1.37895 |
| K104Q | -0.6872  | -2.23883 | -0.99424 |
| K104R | -0.20824 | -0.86816 | -1.11704 |
| K104S | -0.00171 | -0.12865 | 0.5106   |
| K104T | -0.51563 | 0.5575   | 0.10265  |
| K104V | 1.24543  | -0.38833 | 1.21174  |
| K104W | -0.10271 | 0.46064  | 0.57561  |
| K104Y | -0.21992 | -0.11213 | 0.86382  |
| K104X | 0.38687  | -0.73975 | -0.84655 |
| D105A | -0.97478 | -0.99477 | -1.20323 |
| D105C | -0.65309 | -1.00029 | -0.9977  |
| D105D | NA       | NA       | NA       |
| D105E | -0.14357 | -0.03823 | 0.90178  |
| D105F | -1.10008 | -0.12659 | -1.07193 |
| D105G | -0.36544 | -0.3401  | -0.76068 |
| D105H | -1.26221 | -0.47128 | -1.2339  |
| D105I | -0.3987  | 0.57154  | -1.19709 |
| D105K | 0.14102  | 1.13208  | -1.13324 |
| D105L | -0.69966 | 0.22104  | -1.10427 |
| D105M | 0.04097  | -0.09858 | -0.82074 |
| D105N | -0.01619 | -0.15719 | -1.32642 |
| D105P | -0.10477 | 0.36934  | -0.94481 |
| D105Q | -0.80689 | -0.4358  | -0.91477 |
| D105R | -0.19835 | -0.28586 | -1.21947 |
| D105S | 0.7645   | 0.66172  | -1.29266 |
| D105T | 0.19647  | 0.73863  | -0.76795 |
| D105V | -0.46236 | -1.2844  | -1.12359 |
| D105W | -0.54797 | -0.14627 | -1.17286 |
| D105Y | -0.45413 | 0.27369  | -0.91449 |
| D105X | 0.43607  | 0.47277  | -0.9372  |
| S106A | -0.50239 | -0.59757 | 0.22611  |
| S106C | 0.00636  | 0.35987  | 0.05076  |
| S106D | 0.24372  | 0.00023  | 0.32952  |
| S106E | -0.02741 | 0.59061  | 0.15535  |
| S106F | -0.96569 | -2.1688  | 0.512    |
| S106G | -0.13724 | 0.12002  | 0.19783  |
| S106H | 0.73956  | 0.1801   | 0.14854  |
| S106I | -0.00965 | 0.03452  | -0.10731 |

|       |          |          |          |
|-------|----------|----------|----------|
| S106K | -0.34806 | 0.63036  | -0.13447 |
| S106L | 0.11619  | 0.34136  | -0.00657 |
| S106M | 0.50033  | -0.07205 | -0.16481 |
| S106N | 0.13493  | 0.14419  | -0.04997 |
| S106P | -0.58038 | -0.72469 | -0.31189 |
| S106Q | -0.24547 | -0.60595 | -0.22482 |
| S106R | -0.96545 | 0.52927  | 0.06093  |
| S106S | 0.00034  | 0.20024  | -0.26506 |
| S106T | 2.4365   | 2.74256  | 0.00713  |
| S106V | -0.27923 | -0.16952 | -0.01008 |
| S106W | -0.19105 | -0.43814 | 0.66512  |
| S106Y | -0.5813  | -0.20275 | 0.45819  |
| S106X | 0.56792  | 0.30254  | -0.98778 |
| E107A | -0.13481 | -0.38037 | -0.48442 |
| E107C | 0.00259  | -0.12742 | -0.16297 |
| E107D | 0.09039  | -0.2832  | 0.15032  |
| E107E | NA       | NA       | NA       |
| E107F | -1.7328  | -1.55564 | -0.6232  |
| E107G | -0.23822 | -1.20797 | -0.61991 |
| E107H | -0.84903 | -0.80336 | -0.50868 |
| E107I | -0.63199 | 0.0119   | -0.51649 |
| E107K | -0.53388 | -0.59592 | -0.51509 |
| E107L | 0.5868   | 0.65667  | -0.67428 |
| E107M | -0.34794 | 0.32451  | -0.43996 |
| E107N | -0.07436 | 0.18407  | -0.33959 |
| E107P | -0.41372 | -0.81772 | -0.47745 |
| E107Q | -0.82002 | 0.13182  | -0.53908 |
| E107R | -1.1848  | -1.00235 | -0.75774 |
| E107S | 0.11885  | -0.22529 | -0.44493 |
| E107T | -0.71378 | -0.78019 | -0.46706 |
| E107V | 0.06032  | 0.06704  | -0.72684 |
| E107W | -0.33053 | 0.46275  | -0.61473 |
| E107Y | -1.00137 | -0.33965 | -0.71796 |
| E107X | 0.89744  | -0.02285 | -0.50509 |
| D108A | -0.30743 | 0.45586  | -0.24265 |
| D108C | -0.85451 | -0.19287 | -0.19229 |
| D108D | NA       | NA       | NA       |
| D108E | -0.55599 | -0.19856 | 0.34888  |
| D108F | -0.54065 | 0.16832  | 0.0823   |
| D108G | -0.43078 | -0.5937  | -0.37818 |
| D108H | -0.39825 | -1.019   | 0.15421  |
| D108I | -0.23177 | 0.20731  | -0.27292 |
| D108K | -0.45498 | -0.32217 | -0.38208 |

|       |          |          |          |
|-------|----------|----------|----------|
| D108L | 0.33524  | 0.96694  | -0.07631 |
| D108M | -0.39253 | 0.17773  | -0.25338 |
| D108N | -0.76844 | -0.20747 | -0.18289 |
| D108P | -0.54698 | -0.42872 | -0.58927 |
| D108Q | 0.59533  | -0.96627 | -0.0511  |
| D108R | -0.77608 | -0.08442 | -0.25865 |
| D108S | -0.24728 | 0.00036  | -0.16576 |
| D108T | 0.71836  | 0.63449  | -0.26319 |
| D108V | -0.81789 | 0.17439  | -0.18603 |
| D108W | 0.00244  | 0.18358  | -0.01851 |
| D108Y | -0.29288 | 1.04314  | -0.22019 |
| D108X | 0.3325   | 0.73386  | -1.27707 |
| V109A | 0.42449  | -0.02637 | 0.32441  |
| V109C | 0.09955  | -0.79297 | -0.16112 |
| V109D | 0.01396  | 0.15291  | -0.8045  |
| V109E | 0.65328  | 0.6527   | -0.2555  |
| V109F | 0.78612  | 0.63901  | 0.07848  |
| V109G | 0.38601  | -0.86545 | -0.11854 |
| V109H | -1.12596 | -0.26909 | -0.30255 |
| V109I | -0.01182 | 0.40935  | -0.06225 |
| V109K | -0.04609 | -0.01609 | -1.00125 |
| V109L | 1.67415  | 1.24678  | -0.11863 |
| V109M | 0.18124  | 0.15733  | 0.46734  |
| V109N | -0.30813 | -0.47432 | 0.0446   |
| V109P | 0.06096  | 0.12027  | 0.71183  |
| V109Q | -1.26346 | -0.69965 | 0.04637  |
| V109R | 0.02599  | -1.10249 | -0.52566 |
| V109S | 0.5617   | 0.21813  | -0.35728 |
| V109T | -1.08292 | -0.22901 | -0.27075 |
| V109V | NA       | NA       | NA       |
| V109W | 0.29382  | -0.588   | 0.24804  |
| V109Y | 0.25118  | -0.15974 | -0.05105 |
| V109X | 0.10658  | -0.28478 | -0.8952  |
| P110A | -0.72863 | -0.47485 | -0.55871 |
| P110C | -0.49519 | -0.72175 | -0.57935 |
| P110D | -0.43781 | -0.98244 | -0.39438 |
| P110E | 0.30862  | 0.82056  | -0.34999 |
| P110F | 0.18966  | 0.39561  | -0.29588 |
| P110G | -0.76987 | 0.17461  | -0.30939 |
| P110H | -0.18647 | -0.26675 | 0.02     |
| P110I | -0.53447 | 0.27384  | -0.44241 |
| P110K | -0.05434 | -0.68231 | -1.1577  |
| P110L | -1.19556 | 0.15101  | -0.68114 |

|       |          |          |          |
|-------|----------|----------|----------|
| P110M | -0.503   | -0.53639 | -0.52352 |
| P110N | 0.06082  | 0.0966   | -0.64217 |
| P110P | NA       | NA       | NA       |
| P110Q | -0.5259  | 0.32694  | -0.87709 |
| P110R | -0.1525  | 0.72165  | -0.98784 |
| P110S | -0.39238 | -1.29654 | -0.36177 |
| P110T | -0.93889 | -0.1883  | -0.82669 |
| P110V | -0.67213 | 0.16669  | -0.21219 |
| P110W | -0.9213  | -0.36991 | -0.51336 |
| P110Y | -0.37487 | 0.02572  | -0.00386 |
| P110X | -0.3096  | -0.13933 | -1.01998 |
| M111A | -0.76006 | 0.92416  | -0.80945 |
| M111C | 1.2397   | 0.72663  | -0.01127 |
| M111D | -0.33225 | -0.25176 | -0.69916 |
| M111E | -0.26377 | 0.1361   | -0.24596 |
| M111F | -0.24258 | 0.97988  | -0.40355 |
| M111G | 0.0886   | -0.6137  | -0.60686 |
| M111H | -1.03343 | -0.81492 | -0.1913  |
| M111I | -0.28266 | -0.07851 | 0.45817  |
| M111K | -0.45951 | -0.74795 | -0.85118 |
| M111L | -0.31178 | -0.15085 | 0.0647   |
| M111M | NA       | NA       | NA       |
| M111N | -1.18558 | -0.79945 | -0.15997 |
| M111P | 0.03883  | 0.22134  | -0.63957 |
| M111Q | 0.03343  | 0.1755   | -0.12927 |
| M111R | 0.11266  | -0.98006 | -0.61489 |
| M111S | -0.73269 | -0.94077 | -0.63248 |
| M111T | 0.46207  | 0.02137  | 0.30789  |
| M111V | -0.96674 | -0.0145  | -0.05065 |
| M111W | -0.90487 | 0.43667  | 0.40944  |
| M111Y | 0.08021  | 0.13065  | -0.2876  |
| M111X | 0.01817  | 0.25256  | -0.79074 |
| V112A | 0.02432  | 0.22422  | 0.1617   |
| V112C | -0.56036 | -0.15176 | -0.18897 |
| V112D | 0.08504  | -0.25078 | -0.57068 |
| V112E | -0.75101 | -1.63784 | -0.96604 |
| V112F | -0.28987 | 0.11955  | 0.53818  |
| V112G | -0.81924 | 0.23811  | -0.49343 |
| V112H | 0.49453  | 0.49783  | -0.48495 |
| V112I | -0.74037 | -0.83824 | 0.06293  |
| V112K | 1.77491  | -0.50824 | -0.80483 |
| V112L | -0.31476 | 0.04131  | -0.17975 |
| V112M | 0.33634  | 0.62271  | 0.29486  |

|       |          |          |          |
|-------|----------|----------|----------|
| V112N | -1.51297 | -0.34882 | -0.41297 |
| V112P | 0.4123   | -0.20324 | -0.14988 |
| V112Q | -0.39552 | -0.60783 | -0.66109 |
| V112R | 0.41357  | -0.25685 | -0.51314 |
| V112S | 0.00135  | 0.07299  | -0.21041 |
| V112T | -1.12605 | -0.54671 | -0.20938 |
| V112V | NA       | NA       | NA       |
| V112W | 0.72595  | 0.66918  | -0.60362 |
| V112Y | 2.03287  | -0.48973 | 0.56386  |
| V112X | -0.82093 | 0.07612  | -0.26573 |
| L113A | -0.69969 | -0.11613 | 0.09728  |
| L113C | -0.08033 | -0.67844 | -0.03925 |
| L113D | -0.11149 | -0.43809 | -0.92597 |
| L113E | -0.396   | -0.25294 | -0.63682 |
| L113F | -0.02764 | 0.2501   | 0.18308  |
| L113G | 0.52953  | 0.59714  | -0.43522 |
| L113H | 0.11916  | -0.05933 | -0.54331 |
| L113I | -0.38173 | 0.14914  | 0.34737  |
| L113K | 0.08966  | -0.28184 | -1.01106 |
| L113L | -0.14598 | 0.63584  | -0.15871 |
| L113M | 0.37149  | 0.37784  | 0.67956  |
| L113N | 0.3462   | 0.83438  | -0.78668 |
| L113P | -0.30623 | -0.88968 | -0.37677 |
| L113Q | 0.57977  | -0.32935 | -0.24117 |
| L113R | -0.13715 | -0.49402 | -0.5297  |
| L113S | -0.40334 | -1.09734 | -0.01002 |
| L113T | -0.93393 | -0.32639 | 0.15085  |
| L113V | -1.20409 | 0.32022  | 0.49658  |
| L113W | -0.82064 | -0.09498 | 0.96932  |
| L113Y | 0.5386   | -0.28224 | 0.27284  |
| L113X | -0.32833 | 0.58543  | -0.63311 |
| V114A | -0.08016 | -0.20082 | 0.25695  |
| V114C | -0.87126 | -0.26834 | 0.43179  |
| V114D | -0.86399 | -1.03543 | -0.44792 |
| V114E | -0.67792 | -1.50423 | -0.45275 |
| V114F | 0.10193  | -0.46313 | -0.72837 |
| V114G | -0.21986 | -0.21564 | -0.29138 |
| V114H | 0.14424  | -0.43493 | -0.5714  |
| V114I | -0.68686 | -0.14082 | -0.0157  |
| V114K | -0.27508 | -0.75385 | -0.76067 |
| V114L | -0.0564  | -0.28967 | -0.03038 |
| V114M | 1.52513  | 1.83752  | 0.39773  |
| V114N | 0.40043  | -0.85093 | 0.69549  |

|       |          |          |          |
|-------|----------|----------|----------|
| V114P | 0.53237  | 1.17775  | -0.76257 |
| V114Q | -0.02329 | 0.17973  | -0.60287 |
| V114R | 0.13472  | 0.5177   | -0.82932 |
| V114S | -0.52012 | -1.20985 | 0.14524  |
| V114T | 1.17995  | 1.45488  | 0.43868  |
| V114V | NA       | NA       | NA       |
| V114W | 0.57003  | 0.51334  | -0.70506 |
| V114Y | 0.84919  | 1.28179  | -0.67473 |
| V114X | 0.2541   | -0.37129 | -0.75881 |
| G115A | 0.33048  | 0.34885  | 0.54821  |
| G115C | 0.14303  | 0.4086   | 0.89078  |
| G115D | 0.44343  | -0.85705 | 0.04962  |
| G115E | 0.86962  | 0.68922  | 1.75071  |
| G115F | -0.64644 | 0.3382   | 1.23039  |
| G115G | NA       | NA       | NA       |
| G115H | -0.62605 | 0.64081  | 1.30408  |
| G115I | 0.80204  | 0.6305   | 1.6854   |
| G115K | 0.06004  | 0.24444  | 1.30998  |
| G115L | 0.12156  | -0.69787 | 1.71364  |
| G115M | -0.85018 | -0.32625 | 1.15915  |
| G115N | 0.90809  | 0.15592  | 1.84741  |
| G115P | -0.41454 | 0.23272  | 0.26006  |
| G115Q | -0.41288 | 0.61569  | 0.90371  |
| G115R | -0.36513 | 0.19637  | 1.10054  |
| G115S | -0.84435 | 0.22078  | 0.89913  |
| G115T | -0.80583 | -1.10384 | 0.77818  |
| G115V | -0.6066  | -0.1455  | 1.4498   |
| G115W | -1.02003 | -0.41362 | -0.03659 |
| G115Y | -0.42728 | -1.16997 | 1.0576   |
| G115X | 0.02842  | -0.17486 | -0.74421 |
| N116A | 1.54134  | 1.36117  | 1.21398  |
| N116C | 2.43123  | 2.62152  | 1.5231   |
| N116D | -0.02109 | 0.59589  | -0.23302 |
| N116E | 1.02553  | 0.95377  | -0.51004 |
| N116F | -0.39914 | -1.22698 | -1.35165 |
| N116G | 0.0389   | -0.90874 | 1.36284  |
| N116H | 0.85673  | 1.61205  | 1.62662  |
| N116I | 1.71311  | 1.83362  | -0.5249  |
| N116K | -0.08767 | 0.25825  | -0.62291 |
| N116L | 5.44244  | 6.3576   | 2.14022  |
| N116M | 2.12733  | 2.39397  | 1.75844  |
| N116N | NA       | NA       | NA       |
| N116P | 0.14773  | 0.01144  | -1.12676 |



|       |          |          |          |
|-------|----------|----------|----------|
| N116Q | -0.1965  | 0.43485  | 0.79332  |
| N116R | -0.15532 | -0.56649 | -1.40669 |
| N116S | -0.1309  | -0.17798 | 1.21888  |
| N116T | 0.74376  | 0.7582   | 1.57564  |
| N116V | 5.33835  | 6.32183  | 1.63304  |
| N116W | -0.30154 | -0.39764 | -1.37692 |
| N116Y | -0.58263 | -1.00658 | -0.93289 |
| N116X | 0.54178  | 0.45608  | -0.73927 |
| K117A | 0.88133  | 1.15901  | 2.27167  |
| K117C | 1.79424  | 1.92807  | 2.4184   |
| K117D | 2.71925  | 3.03338  | 1.56589  |
| K117E | 3.87363  | 5.22722  | 2.77842  |
| K117F | 1.06257  | 1.86238  | 2.56766  |
| K117G | 2.28462  | 2.5079   | 2.44052  |
| K117H | 1.72967  | 2.43048  | 2.57713  |
| K117I | 0.46248  | 0.83961  | 2.43984  |
| K117K | NA       | NA       | NA       |
| K117L | 2.84169  | 3.50615  | 2.46168  |
| K117M | -0.50026 | 0.05408  | 2.14488  |
| K117N | 4.32249  | 5.88891  | 2.42486  |
| K117P | -0.45453 | -0.20932 | -1.02807 |
| K117Q | 0.05237  | 0.51406  | 2.08975  |
| K117R | 1.26028  | 2.09016  | 1.6935   |
| K117S | 1.41054  | 2.05742  | 2.70152  |
| K117T | 0.70855  | 1.36142  | 2.89841  |
| K117V | 0.21539  | 0.17506  | 2.2732   |
| K117W | 0.23603  | 1.41715  | 2.50255  |
| K117Y | 5.09625  | 6.95855  | 2.63945  |
| K117X | 0.17736  | 0.1424   | -0.96099 |
| C118A | 0.02016  | 0.07625  | -0.24112 |
| C118C | NA       | NA       | NA       |
| C118D | -0.26268 | 0.85006  | 0.15705  |
| C118E | 0.0762   | -0.42124 | 0.26616  |
| C118F | -0.05303 | -0.04748 | 0.79425  |
| C118G | -0.74462 | -0.27511 | 0.12012  |
| C118H | -0.05975 | 0.32916  | 0.16734  |
| C118I | -0.71689 | -0.19443 | -0.18678 |
| C118K | 0.46375  | 0.28388  | 0.27305  |
| C118L | -0.57591 | -0.12502 | -0.28915 |
| C118M | -0.13617 | -0.03492 | 0.57169  |
| C118N | -0.9161  | 0.11701  | 0.43626  |
| C118P | 1.95595  | 1.70971  | 0.61643  |
| C118Q | 0.10503  | 0.19693  | 0.39494  |

|       |          |          |          |
|-------|----------|----------|----------|
| C118R | -0.74571 | -0.56318 | -0.19059 |
| C118S | 0.01405  | 0.16057  | 0.00709  |
| C118T | 1.2052   | 1.12348  | -0.23253 |
| C118V | 0.09803  | 0.00454  | -0.1     |
| C118W | -0.02334 | 0.0638   | 0.38593  |
| C118Y | -0.86913 | -0.20541 | 0.35314  |
| C118X | 0.57252  | -0.52141 | -0.64717 |
| D119A | 1.68257  | 0.73942  | 2.26323  |
| D119C | 0.75419  | 0.71043  | 1.64175  |
| D119D | NA       | NA       | NA       |
| D119E | 0.06987  | 0.3909   | 1.81689  |
| D119F | 0.4218   | 0.10052  | 1.99816  |
| D119G | 2.06408  | 1.27263  | 1.98711  |
| D119H | 4.94122  | 5.68044  | 2.36624  |
| D119I | 0.20365  | 0.46158  | -0.03002 |
| D119K | 0.14431  | 0.42467  | 1.4758   |
| D119L | -0.37194 | -0.33385 | 2.10847  |
| D119M | 0.42767  | 1.48513  | 2.15984  |
| D119N | 1.88258  | 2.4354   | 1.86834  |
| D119P | 0.00011  | 0.18677  | -0.9929  |
| D119Q | 0.85714  | 1.38494  | 1.86526  |
| D119R | 0.15807  | -0.25354 | 1.05797  |
| D119S | -0.11565 | -0.18575 | 1.94757  |
| D119T | 1.60384  | 1.59716  | 2.03003  |
| D119V | -0.41251 | -0.15405 | 0.16437  |
| D119W | 0.82897  | 1.0234   | 0.45424  |
| D119Y | 1.06336  | 1.22898  | 1.66472  |
| D119X | -0.6906  | -0.66407 | -0.7981  |
| L120A | -0.60856 | 0.25716  | 1.63656  |
| L120C | -0.54035 | 0.66777  | 1.70425  |
| L120D | 0.16139  | 0.92868  | 1.22773  |
| L120E | 0.85707  | 0.49415  | 1.4236   |
| L120F | 0.09552  | 0.02268  | 1.14499  |
| L120G | 0.39596  | 0.78486  | 1.35885  |
| L120H | 2.13092  | 1.28606  | 1.44309  |
| L120I | 0.25883  | 0.65585  | 0.36237  |
| L120K | -0.1598  | -0.19009 | 1.15408  |
| L120L | 0.11463  | -0.18253 | 0.09811  |
| L120M | 0.59207  | -0.15981 | 0.98433  |
| L120N | -0.97529 | 0.07326  | 1.80677  |
| L120P | 0.41823  | 0.58101  | 1.9184   |
| L120Q | 0.11173  | -0.08879 | 1.37009  |
| L120R | -0.66763 | -0.18138 | 0.59654  |

|       |          |          |          |
|-------|----------|----------|----------|
| L120S | -0.27025 | 0.56688  | 1.75194  |
| L120T | 1.13171  | 1.28536  | 1.74657  |
| L120V | 0.23595  | -0.83998 | 1.1091   |
| L120W | 0.47109  | 0.37266  | 1.27501  |
| L120Y | 0.54343  | 0.1424   | 1.9094   |
| L120X | 0.18129  | 0.06848  | -0.74024 |
| P121A | -0.80331 | -0.19886 | -0.20357 |
| P121C | 0.09697  | -0.66428 | -0.41489 |
| P121D | -0.87449 | 0.08973  | 0.10341  |
| P121E | -0.16264 | -0.11062 | -0.0923  |
| P121F | -0.29071 | -0.33668 | -0.32952 |
| P121G | -0.43064 | 0.40458  | -0.20546 |
| P121H | 0.23943  | -0.22258 | -0.32711 |
| P121I | 1.44572  | 0.37447  | -0.32774 |
| P121K | -0.94892 | 0.62288  | -0.00437 |
| P121L | -1.05581 | -0.87917 | -0.42139 |
| P121M | -1.03626 | -0.8739  | -0.60706 |
| P121N | -0.95149 | 0.1636   | -0.17424 |
| P121P | NA       | NA       | NA       |
| P121Q | 0.00134  | 0.43486  | 0.13274  |
| P121R | -0.37399 | -0.30151 | -0.48205 |
| P121S | 0.23313  | -1.21776 | -0.00967 |
| P121T | -0.3831  | -0.41942 | 0.02381  |
| P121V | -0.9824  | 0.35403  | -0.26912 |
| P121W | -0.82767 | 0.22973  | -0.65583 |
| P121Y | -0.2174  | -0.34908 | -0.2855  |
| P121X | -0.00912 | -0.62362 | -1.17032 |
| S122A | 1.3767   | 1.53732  | -0.02885 |
| S122C | 0.15432  | 0.12181  | -0.0846  |
| S122D | -0.3231  | 0.462    | -0.09069 |
| S122E | -0.0801  | -0.40616 | 0.06901  |
| S122F | -0.2683  | 0.11734  | -0.26968 |
| S122G | 0.14211  | -0.19643 | 0.25674  |
| S122H | -0.01376 | 0.39044  | 0.1343   |
| S122I | -0.1641  | 0.01888  | -0.03532 |
| S122K | -0.46078 | 0.93393  | 0.01748  |
| S122L | -0.37368 | 0.31102  | 0.22741  |
| S122M | 0.44816  | -0.04494 | -0.09348 |
| S122N | 0.45295  | 0.79998  | 0.52581  |
| S122P | 0.12073  | 0.39858  | 1.38186  |
| S122Q | -0.07779 | 0.50143  | -0.10151 |
| S122R | 0.23547  | 0.26259  | 0.04105  |
| S122S | 0.10532  | 1.1073   | 0.06008  |

|       |          |          |          |
|-------|----------|----------|----------|
| S122T | -0.15071 | 0.07531  | 0.21088  |
| S122V | -0.36236 | -0.73751 | -0.50214 |
| S122W | -0.92137 | -0.74276 | -0.16221 |
| S122Y | -0.0326  | 0.2194   | -0.31499 |
| S122X | 0.08028  | -0.00245 | -0.75091 |
| R123A | -0.66287 | 1.37796  | 0.99479  |
| R123C | -0.39283 | 0.4062   | 0.75397  |
| R123D | 1.16955  | 1.35158  | 0.58121  |
| R123E | 0.39435  | -0.22222 | 0.9086   |
| R123F | -0.88184 | -0.62594 | 0.44158  |
| R123G | -0.648   | -0.96045 | 0.50745  |
| R123H | -0.1137  | 0.29161  | 0.20083  |
| R123I | -0.36017 | 0.02505  | 0.79068  |
| R123K | -0.10451 | -0.42717 | 0.37056  |
| R123L | 1.44749  | 1.47421  | 0.81001  |
| R123M | -0.71449 | 0.37365  | 0.60238  |
| R123N | 0.33799  | 0.90203  | 0.99521  |
| R123P | -0.49891 | -0.09927 | 1.21043  |
| R123Q | -0.13613 | 0.71467  | 0.45516  |
| R123R | -0.33416 | -0.22814 | 0.09061  |
| R123S | -0.13794 | -1.7919  | 0.55398  |
| R123T | -1.17889 | -1.72105 | 0.72729  |
| R123V | 0.49705  | 0.33867  | 0.24821  |
| R123W | -0.57548 | -0.13349 | -0.44771 |
| R123Y | -0.00714 | 0.58179  | 0.04328  |
| R123X | -0.41991 | 0.03784  | -0.85326 |
| T124A | -0.49476 | 0.4376   | 0.14701  |
| T124C | -0.55691 | -0.56957 | 0.13874  |
| T124D | 0.00158  | -0.8549  | 0.45849  |
| T124E | 0.67073  | -0.08815 | 0.12549  |
| T124F | -0.93231 | -1.11288 | 0.00474  |
| T124G | 0.11093  | 0.25077  | 0.41729  |
| T124H | 0.15068  | -0.94036 | 0.28454  |
| T124I | 0.85748  | 0.47424  | 0.38491  |
| T124K | -0.17759 | 1.07748  | 0.2547   |
| T124L | -0.21646 | -0.54621 | 0.17299  |
| T124M | 0.18464  | 0.37278  | 0.00181  |
| T124N | 1.00821  | 0.09889  | 0.06252  |
| T124P | -0.63624 | -0.17555 | -0.19388 |
| T124Q | 0.64611  | 0.77654  | 0.66425  |
| T124R | -0.02151 | 0.0498   | 0.01205  |
| T124S | 0.12395  | 1.18998  | -0.0329  |
| T124T | NA       | NA       | NA       |

|       |          |          |          |
|-------|----------|----------|----------|
| T124V | -0.35655 | 0.42933  | 0.49005  |
| T124W | -0.24559 | 0.80756  | -0.03462 |
| T124Y | -0.969   | -0.47719 | -0.03531 |
| T124X | -0.32436 | -0.19493 | -0.88901 |
| V125A | -1.50267 | -0.92613 | 0.0928   |
| V125C | 0.00195  | -0.42506 | 0.48535  |
| V125D | -1.90573 | -1.26969 | 0.60482  |
| V125E | -0.91861 | 0.09025  | 0.75523  |
| V125F | -0.45194 | -0.16965 | 0.52813  |
| V125G | -0.96443 | 0.557    | 0.61901  |
| V125H | -0.89203 | -0.29172 | 0.44749  |
| V125I | -0.13404 | -0.0987  | 0.08488  |
| V125K | -0.37808 | 0.01518  | 0.29075  |
| V125L | -0.33193 | -0.3415  | -0.01493 |
| V125M | -0.57403 | -0.01646 | 0.27964  |
| V125N | -1.54859 | 0.13362  | 0.65755  |
| V125P | 0.22504  | 0.52142  | 0.66287  |
| V125Q | -0.49658 | -0.32991 | -0.00235 |
| V125R | -0.96641 | -0.40738 | 0.04179  |
| V125S | -0.32081 | -0.17542 | 0.53902  |
| V125T | 0.33122  | 0.49584  | 0.19726  |
| V125V | NA       | NA       | NA       |
| V125W | -0.37479 | -1.0613  | 0.8478   |
| V125Y | 0.85732  | -0.08954 | 0.71793  |
| V125X | 0.67932  | 0.30896  | -0.58016 |
| D126A | -0.4798  | -0.82445 | -0.40384 |
| D126C | -0.16051 | 0.72302  | 0.03416  |
| D126D | NA       | NA       | NA       |
| D126E | 0.52317  | 0.04009  | 0.05536  |
| D126F | -1.14129 | -0.31593 | -0.23929 |
| D126G | 1.27036  | 0.95864  | -0.2146  |
| D126H | -0.68061 | -1.36577 | -0.34866 |
| D126I | -1.41357 | -4.16516 | -0.6519  |
| D126K | -0.27744 | -0.23059 | -0.57984 |
| D126L | -0.0932  | 0.00937  | 0.16742  |
| D126M | -0.3957  | 0.41985  | -0.16432 |
| D126N | 0.72852  | 0.70211  | -0.22738 |
| D126P | 0.65057  | 0.94095  | 0.12519  |
| D126Q | 0.23784  | 0.52451  | -0.37231 |
| D126R | 0.57538  | -0.09437 | -0.52667 |
| D126S | -0.60799 | -0.48773 | -0.17164 |
| D126T | 0.04687  | 0.05331  | -0.49522 |
| D126V | 0.33331  | 0.4724   | -0.1945  |

|       |          |          |          |
|-------|----------|----------|----------|
| D126W | -0.40567 | -0.20543 | -0.32571 |
| D126Y | 0.36544  | -0.07702 | -0.27873 |
| D126X | 0.54143  | 0.01574  | -0.53273 |
| T127A | -0.44444 | -0.26364 | -0.12444 |
| T127C | -0.47911 | -0.0154  | -0.28739 |
| T127D | -0.25737 | -0.11505 | 0.68115  |
| T127E | -1.33912 | -0.48692 | -0.3145  |
| T127F | -0.15191 | -1.12364 | -0.22393 |
| T127G | 0.6146   | 0.73501  | -0.38426 |
| T127H | -1.1345  | 0.05708  | -0.10783 |
| T127I | 0.16996  | 0.6146   | -0.1017  |
| T127K | -0.05743 | 0.44368  | -0.46867 |
| T127L | -0.7894  | -0.23152 | 0.22814  |
| T127M | -0.40028 | -0.07066 | 0.16304  |
| T127N | -0.02981 | -1.41943 | -0.27682 |
| T127P | -1.11625 | -0.06542 | -0.11584 |
| T127Q | -0.88236 | -1.11397 | -0.05313 |
| T127R | -0.13233 | 0.73495  | -0.04904 |
| T127S | -0.67852 | -0.95664 | -0.18967 |
| T127T | NA       | NA       | NA       |
| T127V | -0.30087 | 1.50761  | 0.36796  |
| T127W | -0.88632 | -0.4874  | -0.53347 |
| T127Y | -0.0684  | 0.3029   | -0.03406 |
| T127X | -0.2268  | -0.23221 | -0.96971 |
| K128A | -0.36656 | -0.36653 | 0.55701  |
| K128C | -2.05192 | -0.92879 | 0.44399  |
| K128D | -0.05618 | -0.78808 | 0.93343  |
| K128E | 1.99077  | 2.19311  | 1.39598  |
| K128F | 0.39356  | 1.21246  | 0.37249  |
| K128G | -0.34576 | 0.01205  | 0.49761  |
| K128H | -0.32781 | -0.12544 | 0.50259  |
| K128I | -0.46305 | -0.58192 | 0.40219  |
| K128K | NA       | NA       | NA       |
| K128L | -0.80873 | 0.18401  | 0.3559   |
| K128M | -0.00496 | -0.42346 | 0.55981  |
| K128N | 0.00249  | 0.5228   | 0.53494  |
| K128P | 1.06868  | 1.19688  | 0.10185  |
| K128Q | 0.16552  | -0.10085 | 0.91674  |
| K128R | 0.60633  | 0.50419  | 0.12272  |
| K128S | -0.44613 | -0.35242 | 0.56381  |
| K128T | 0.66029  | -0.43331 | 0.6651   |
| K128V | 0.35955  | -0.29993 | 0.66208  |
| K128W | 2.26404  | -0.22646 | 0.76766  |

|       |          |          |          |
|-------|----------|----------|----------|
| K128Y | 0.50625  | 0.45654  | 0.42565  |
| K128X | 0.50917  | -0.9371  | -0.64653 |
| Q129A | 1.00951  | 1.38001  | 0.28777  |
| Q129C | 0.06284  | -0.65325 | 0.27274  |
| Q129D | 0.16805  | -0.06939 | 0.69319  |
| Q129E | -0.63353 | -0.39458 | 0.4251   |
| Q129F | 0.32518  | 1.53757  | 0.8247   |
| Q129G | -0.83735 | -0.07344 | 0.1554   |
| Q129H | -0.06277 | 0.56341  | 0.14364  |
| Q129I | -0.29438 | -0.27742 | 0.22959  |
| Q129K | -0.48576 | 0.23958  | -0.3005  |
| Q129L | -0.22829 | 0.5547   | -0.00965 |
| Q129M | -0.12188 | -1.02959 | 0.08944  |
| Q129N | -0.40141 | -0.18865 | 0.22201  |
| Q129P | -0.78406 | -0.62476 | 0.3793   |
| Q129Q | NA       | NA       | NA       |
| Q129R | -0.45795 | 0.48744  | -0.40547 |
| Q129S | -0.84944 | -0.80362 | 0.08977  |
| Q129T | -0.84199 | 0.43639  | 0.06422  |
| Q129V | 0.10219  | -0.03026 | 0.53543  |
| Q129W | -0.06274 | -0.45775 | -0.17411 |
| Q129Y | 0.21207  | -0.80343 | 0.4448   |
| Q129X | 0.50272  | -0.47955 | -1.04429 |
| A130A | NA       | NA       | NA       |
| A130C | -0.44471 | -0.27279 | -0.2049  |
| A130D | -0.22755 | -0.27243 | 0.38853  |
| A130E | 0.09925  | 0.53216  | 0.01883  |
| A130F | -0.53645 | -0.60579 | 0.15304  |
| A130G | -0.6635  | 0.49182  | -0.0817  |
| A130H | -0.71515 | -0.07052 | -0.11451 |
| A130I | 0.19943  | -0.17875 | 0.01121  |
| A130K | 0.29031  | -0.36609 | -0.18922 |
| A130L | -0.03777 | -0.26551 | -0.26483 |
| A130M | -0.31249 | -0.24161 | -0.0714  |
| A130N | -0.69867 | -0.52824 | 0.35967  |
| A130P | -1.24855 | -0.38384 | 0.36928  |
| A130Q | 0.04541  | 0.03407  | 0.07362  |
| A130R | -1.23185 | -0.87011 | -0.22511 |
| A130S | 0.07162  | -0.13742 | 0.2105   |
| A130T | 0.36769  | 0.06333  | -0.1013  |
| A130V | -0.48229 | -0.22327 | 0.1292   |
| A130W | -0.71759 | -0.13605 | 0.09709  |
| A130Y | -0.36144 | -0.38738 | 0.38565  |

|       |          |          |          |
|-------|----------|----------|----------|
| A130X | 0.48749  | 0.20829  | -0.6338  |
| Q131A | 0.28377  | 0.16614  | -0.29441 |
| Q131C | 0.15522  | -0.35796 | -0.16833 |
| Q131D | 2.01616  | 1.83813  | 0.48863  |
| Q131E | 0.48507  | 0.69345  | 0.20449  |
| Q131F | -0.4156  | -0.40848 | -0.23486 |
| Q131G | -1.13172 | -0.77705 | 0.04181  |
| Q131H | 0.34412  | 0.25104  | 0.07972  |
| Q131I | -0.00483 | -0.09616 | -0.05831 |
| Q131K | -0.92388 | -0.47568 | -0.48827 |
| Q131L | -0.25396 | -0.0853  | -0.02979 |
| Q131M | -0.39047 | -0.0796  | 0.14494  |
| Q131N | 0.51024  | 0.50861  | -0.12811 |
| Q131P | -0.52785 | -1.16164 | 0.5937   |
| Q131Q | NA       | NA       | NA       |
| Q131R | 0.15321  | -0.55885 | -0.36011 |
| Q131S | 0.17344  | -0.41548 | 0.30033  |
| Q131T | -0.9036  | 0.23877  | 0.1848   |
| Q131V | -0.02253 | 0.31476  | -0.09629 |
| Q131W | -0.69775 | -0.47712 | 0.05239  |
| Q131Y | 0.21084  | 0.20701  | 0.13305  |
| Q131X | 0.47083  | -0.26981 | -0.70294 |
| D132A | 0.1449   | 0.87586  | -0.27742 |
| D132C | -0.51391 | 0.43941  | -0.67246 |
| D132D | NA       | NA       | NA       |
| D132E | -0.39739 | 0.45677  | -0.11729 |
| D132F | -1.31418 | -0.89989 | -0.39429 |
| D132G | 0.01372  | 0.45374  | -0.55019 |
| D132H | 1.02843  | 1.54307  | -0.83382 |
| D132I | -0.15796 | -0.74502 | -0.22357 |
| D132K | -0.24885 | -0.2714  | -0.7155  |
| D132L | -0.37688 | -0.23189 | -0.37648 |
| D132M | -0.0484  | 0.36113  | -0.3419  |
| D132N | -0.59737 | -0.72954 | -0.53361 |
| D132P | -0.74373 | 0.09485  | -0.60594 |
| D132Q | 0.53866  | -0.86044 | -0.64626 |
| D132R | 0.09908  | 0.07878  | -0.72114 |
| D132S | -0.90637 | -0.59086 | -0.62222 |
| D132T | -0.16974 | -0.0476  | -0.32898 |
| D132V | -0.18355 | -0.32687 | -0.27843 |
| D132W | -0.84794 | -0.44126 | -0.32567 |
| D132Y | -0.12631 | -0.33603 | -0.37774 |
| D132X | -0.02176 | -0.31096 | -0.69954 |



|       |          |          |          |
|-------|----------|----------|----------|
| L133A | -0.56313 | 0.40387  | 0.06308  |
| L133C | -0.98519 | -0.52545 | 0.06127  |
| L133D | -0.20723 | -0.28157 | 0.17987  |
| L133E | -0.05955 | -0.29405 | -0.16642 |
| L133F | 0.18945  | 0.40471  | 0.24821  |
| L133G | -0.53869 | -0.71496 | -0.62673 |
| L133H | -0.07423 | -1.04983 | -0.23829 |
| L133I | -0.5395  | -1.13733 | 0.32459  |
| L133K | -1.35246 | -0.578   | -0.69841 |
| L133L | -0.24574 | -0.29866 | -0.24568 |
| L133M | -0.58039 | 0.11588  | -0.05564 |
| L133N | 0.2431   | -0.25381 | -0.28907 |
| L133P | 0.6346   | 0.46989  | -0.17323 |
| L133Q | -0.36087 | 0.59226  | -0.46292 |
| L133R | 0.19744  | -0.34768 | -0.42303 |
| L133S | 1.90889  | 2.16874  | 0.42794  |
| L133T | -1.363   | -0.56556 | 0.28678  |
| L133V | -0.66238 | -0.24163 | 0.3772   |
| L133W | -0.2903  | -0.05809 | 0.96674  |
| L133Y | 0.99563  | 0.44874  | 0.49196  |
| L133X | 0.19722  | 1.03752  | -0.56677 |
| A134A | NA       | NA       | NA       |
| A134C | -0.76994 | -0.57104 | 0.23385  |
| A134D | -0.29459 | -0.56253 | -0.13115 |
| A134E | -0.36219 | -0.27818 | 0.11114  |
| A134F | -0.74507 | -1.30828 | 0.31755  |
| A134G | 0.66068  | 0.47362  | -0.22286 |
| A134H | -0.08787 | 0.55747  | 0.00516  |
| A134I | 0.53469  | 0.57938  | 0.12978  |
| A134K | 0.11751  | 1.0927   | -0.2696  |
| A134L | 0.21203  | -0.57651 | 0.2878   |
| A134M | 0.83357  | 0.65774  | 0.00888  |
| A134N | 0.10588  | -0.74644 | 0.11947  |
| A134P | -0.02371 | 0.12839  | -0.03548 |
| A134Q | -0.49289 | -0.35824 | -0.18707 |
| A134R | -0.00808 | -0.24152 | -0.54396 |
| A134S | 0.3503   | -0.26412 | -0.01734 |
| A134T | -0.32288 | 1.27248  | 0.01608  |
| A134V | 0.54233  | 1.40121  | 0.10459  |
| A134W | -0.08551 | 0.27304  | 0.13689  |
| A134Y | 0.04373  | 1.04528  | 0.50484  |
| A134X | -0.46881 | -0.16211 | -0.99073 |
| R135A | 0.35892  | 0.98657  | 0.50471  |

|       |          |          |          |
|-------|----------|----------|----------|
| R135C | -0.69551 | -0.44952 | 0.73402  |
| R135D | -0.13525 | -0.27874 | 1.20307  |
| R135E | -0.69381 | -0.52921 | 0.68175  |
| R135F | -0.16824 | -0.75272 | 0.62191  |
| R135G | -0.3098  | 0.39799  | 0.22045  |
| R135H | -0.21741 | 0.6082   | 0.36649  |
| R135I | 0.51912  | 0.18471  | 0.84285  |
| R135K | 0.2291   | 0.87453  | 0.1958   |
| R135L | 0.24044  | -1.36328 | 0.49169  |
| R135M | 0.11222  | -1.8148  | 0.68994  |
| R135N | 1.75477  | 2.35421  | 0.55099  |
| R135P | 0.46326  | 0.11004  | 0.42553  |
| R135Q | -0.24418 | -0.02729 | 0.3289   |
| R135R | 0.12491  | 0.64663  | -0.00042 |
| R135S | 0.00855  | 0.92194  | 0.62827  |
| R135T | -0.52121 | -0.35769 | 0.58061  |
| R135V | 0.13675  | 0.20358  | 0.28723  |
| R135W | -0.17056 | -0.42933 | 1.19317  |
| R135Y | 0.07613  | -0.06857 | 0.75187  |
| R135X | 0.5408   | -1.22065 | -0.69468 |
| S136A | 0.52184  | 0.19607  | 0.23001  |
| S136C | 0.37902  | -0.42332 | 0.23707  |
| S136D | -0.04476 | 0.49113  | 0.37309  |
| S136E | -0.22854 | -0.38721 | 0.01518  |
| S136F | 0.0095   | 0.71304  | 0.50262  |
| S136G | -0.45014 | -0.25043 | 0.13092  |
| S136H | 0.56654  | 0.99707  | 0.11706  |
| S136I | -1.25648 | -1.21867 | 0.32835  |
| S136K | -1.5829  | -0.64139 | -0.58314 |
| S136L | -0.97864 | -0.18428 | -0.10256 |
| S136M | -1.34485 | 0.15216  | 0.40384  |
| S136N | 0.61353  | -0.13505 | 0.39916  |
| S136P | 0.02515  | -0.01917 | -0.44654 |
| S136Q | -0.36209 | -0.03041 | -0.06121 |
| S136R | -0.1116  | -0.3918  | -0.48    |
| S136S | 0.07871  | 0.06831  | 0.07803  |
| S136T | -1.2357  | -1.42782 | -0.19235 |
| S136V | -0.32772 | 0.18633  | 0.32298  |
| S136W | 0.65964  | 1.08527  | 1.15351  |
| S136Y | 0.75301  | -0.21462 | 0.84439  |
| S136X | -0.25202 | -0.02386 | -0.42233 |
| Y137A | 0.34602  | 1.11354  | -0.11563 |
| Y137C | -0.13072 | 0.17808  | -0.34611 |

|       |          |          |          |
|-------|----------|----------|----------|
| Y137D | -0.91274 | -0.12973 | -0.27683 |
| Y137E | -1.02754 | -0.01135 | -0.07451 |
| Y137F | -0.393   | -1.09649 | -0.21554 |
| Y137G | 0.31083  | 0.10607  | -0.22115 |
| Y137H | -0.56156 | -0.02837 | 0.15481  |
| Y137I | -0.30384 | -0.13041 | -0.31134 |
| Y137K | -0.59812 | 0.14863  | -0.55487 |
| Y137L | -0.46216 | -0.22534 | -0.53973 |
| Y137M | -0.96722 | -0.50545 | -0.12027 |
| Y137N | 0.15992  | -0.51751 | -0.18808 |
| Y137P | -1.25568 | -0.05583 | -0.43702 |
| Y137Q | -0.56628 | -0.60008 | -0.36651 |
| Y137R | 0.72626  | 0.54503  | -0.46852 |
| Y137S | 0.03769  | 0.34712  | -0.05879 |
| Y137T | -0.46337 | -0.00846 | -0.10983 |
| Y137V | 0.14598  | 0.26566  | -0.40454 |
| Y137W | -0.29848 | -0.04592 | 0.24569  |
| Y137Y | NA       | NA       | NA       |
| Y137X | -0.71099 | 0.39704  | -0.9318  |
| G138A | 0.89489  | -0.19507 | 0.17326  |
| G138C | -0.19961 | 0.53617  | 0.29316  |
| G138D | -0.53234 | -0.34285 | 0.56912  |
| G138E | 1.46445  | 0.66177  | 0.70111  |
| G138F | 0.19136  | 0.79787  | 0.63462  |
| G138G | NA       | NA       | NA       |
| G138H | -0.82052 | -0.03286 | 0.06237  |
| G138I | -0.28154 | -0.55732 | 0.1707   |
| G138K | 0.32218  | 0.16046  | -0.43771 |
| G138L | -0.34549 | 0.52524  | 0.43314  |
| G138M | -0.13779 | 0.77014  | 0.34252  |
| G138N | 0.13646  | -0.62804 | 0.43976  |
| G138P | -0.04515 | -1.29859 | 0.36333  |
| G138Q | -0.07124 | -0.09652 | 0.06388  |
| G138R | 0.03057  | 0.27831  | -0.37658 |
| G138S | 1.26732  | 1.1659   | 0.30914  |
| G138T | -0.18899 | -0.50997 | 0.325    |
| G138V | -1.17855 | -1.15204 | 0.11121  |
| G138W | -0.45888 | -0.22101 | 0.36482  |
| G138Y | -0.57039 | -0.54768 | 0.2574   |
| G138X | -0.11364 | -0.89779 | -0.44769 |
| I139A | -0.00665 | 0.6969   | -0.23522 |
| I139C | 0.9397   | 0.83182  | 0.02809  |
| I139D | -0.63045 | -0.24288 | -0.0755  |

|       |          |          |          |
|-------|----------|----------|----------|
| I139E | 0.16476  | 0.05555  | 0.102    |
| I139F | 1.24174  | 1.07322  | 0.30126  |
| I139G | -0.11985 | 0.45627  | -0.44466 |
| I139H | -0.92564 | -1.05585 | -0.20606 |
| I139I | NA       | NA       | NA       |
| I139K | -0.01379 | -0.23874 | -0.25145 |
| I139L | -0.10666 | -0.39966 | 0.27862  |
| I139M | -0.14188 | 0.71892  | 0.03315  |
| I139N | -0.8866  | -1.54989 | 0.14268  |
| I139P | 0.10103  | -0.69366 | -0.05608 |
| I139Q | -0.28694 | -0.78374 | -0.49512 |
| I139R | -2.30461 | -0.70374 | -0.43652 |
| I139S | -0.6206  | 0.50937  | -0.1729  |
| I139T | 0.15159  | 0.31713  | -0.36507 |
| I139V | 0.1956   | 0.56309  | -0.066   |
| I139W | 1.11988  | 1.11745  | -0.45989 |
| I139Y | 0.84651  | -0.82976 | -0.57115 |
| I139X | 0.28664  | -0.07356 | -0.77637 |
| P140A | -0.46487 | -0.709   | 0.12646  |
| P140C | 0.72958  | 1.27251  | 0.31804  |
| P140D | 0.982    | -1.08642 | 0.40843  |
| P140E | -0.74497 | 0.0545   | 0.8946   |
| P140F | -0.47158 | -0.04219 | 0.4569   |
| P140G | 0.81103  | -0.60849 | 0.08874  |
| P140H | -0.13544 | -0.18998 | 0.20182  |
| P140I | -0.91711 | -0.55068 | -0.22091 |
| P140K | -0.44229 | -0.67424 | -0.14625 |
| P140L | -0.49194 | -0.40885 | -0.28552 |
| P140M | -0.12303 | 0.60596  | 0.10309  |
| P140N | -0.18406 | 0.37951  | 0.11351  |
| P140P | NA       | NA       | NA       |
| P140Q | 0.12453  | -1.632   | 0.11164  |
| P140R | -0.68038 | 0.11129  | -0.34123 |
| P140S | 0.7389   | 1.21575  | 0.3729   |
| P140T | -0.33724 | -1.23123 | 0.14663  |
| P140V | -0.81098 | -1.10632 | -0.04795 |
| P140W | 0.36088  | 0.48498  | 0.09158  |
| P140Y | -0.60942 | -1.72205 | 0.51625  |
| P140X | -0.19767 | -0.81626 | -0.78087 |
| F141A | -1.0444  | -0.63038 | 0.01829  |
| F141C | -0.85793 | 0.15791  | -0.22194 |
| F141D | -0.8842  | -0.23119 | -0.09669 |
| F141E | 0.01328  | -0.18637 | 0.11843  |

|       |          |          |          |
|-------|----------|----------|----------|
| F141F | NA       | NA       | NA       |
| F141G | 0.5378   | -0.07104 | -0.12463 |
| F141H | 0.69488  | -0.21142 | 0.10465  |
| F141I | 0.53826  | 0.72004  | 0.22582  |
| F141K | -0.87065 | -0.90408 | -0.89351 |
| F141L | -0.08136 | 0.63785  | -0.08331 |
| F141M | -1.89917 | -0.92977 | -0.08285 |
| F141N | -0.83737 | -0.14451 | -0.16799 |
| F141P | -0.8786  | 0.17353  | -0.72646 |
| F141Q | -0.54677 | 0.15581  | -0.22828 |
| F141R | 0.21258  | -0.42144 | -0.15274 |
| F141S | -0.51081 | -0.94102 | -0.12289 |
| F141T | -1.13076 | -0.08353 | 0.30165  |
| F141V | 1.49313  | -0.32521 | 0.00687  |
| F141W | -0.29035 | -0.22047 | -0.02072 |
| F141Y | 1.38829  | 0.46877  | 0.15996  |
| F141X | -0.09486 | -0.17236 | -0.67001 |
| I142A | -0.46587 | -0.76667 | 0.35725  |
| I142C | 2.62456  | 2.85379  | -0.11079 |
| I142D | 0.01608  | -0.63813 | 0.26742  |
| I142E | -0.24674 | 0.22406  | 0.7877   |
| I142F | 0.70916  | -0.09752 | 1.72809  |
| I142G | -0.22539 | 0.19591  | 0.30847  |
| I142H | 0.91033  | 0.39059  | 0.41437  |
| I142I | NA       | NA       | NA       |
| I142K | -0.39752 | -0.81882 | -0.14781 |
| I142L | -0.84962 | 1.19444  | -0.16301 |
| I142M | -0.5093  | -0.26142 | 0.53001  |
| I142N | 0.5284   | -0.06099 | 0.08808  |
| I142P | -0.56784 | -0.19465 | -0.40562 |
| I142Q | -0.62901 | -1.00101 | 0.21491  |
| I142R | -0.79675 | -0.348   | -0.33439 |
| I142S | -0.0891  | -0.31433 | 0.31464  |
| I142T | -0.34298 | 0.03595  | 0.08008  |
| I142V | -0.85417 | 0.39882  | -0.16167 |
| I142W | -0.73309 | 0.0229   | 0.45242  |
| I142Y | 0.57339  | 0.45092  | 0.89881  |
| I142X | -0.39007 | -1.18553 | -0.44688 |
| E143A | -0.50726 | -0.21753 | -0.08317 |
| E143C | -1.79197 | -0.62639 | -0.29829 |
| E143D | -0.04947 | -0.29459 | 0.18671  |
| E143E | NA       | NA       | NA       |
| E143F | 0.14551  | -1.6968  | 0.11245  |

|       |          |          |          |
|-------|----------|----------|----------|
| E143G | 0.05886  | 0.55482  | -0.02298 |
| E143H | -0.07136 | -0.11087 | 0.15911  |
| E143I | -0.65109 | -0.48257 | -0.15178 |
| E143K | 0.3932   | 0.54093  | -0.70103 |
| E143L | -0.23904 | 0.27256  | 0.22175  |
| E143M | -0.02806 | -0.16974 | -0.35112 |
| E143N | -1.69659 | -0.62708 | -0.02293 |
| E143P | 0.1276   | -0.02843 | -0.02318 |
| E143Q | 1.06066  | 0.36609  | -0.16123 |
| E143R | -0.76042 | 0.39957  | -0.14403 |
| E143S | -0.4795  | 0.49408  | -0.18682 |
| E143T | -0.03205 | -0.23333 | -0.10465 |
| E143V | -0.90797 | -1.47654 | 0.38339  |
| E143W | -0.88131 | -0.28736 | -0.03972 |
| E143Y | -0.18334 | -0.76309 | 0.03414  |
| E143X | 0.78351  | 0.63023  | -0.36219 |
| T144A | 0.64804  | 0.51801  | 0.44292  |
| T144C | 0.40652  | 0.11925  | 0.37036  |
| T144D | 0.09619  | -0.26605 | -0.88393 |
| T144E | 0.17865  | -0.39558 | -0.68282 |
| T144F | 0.71345  | 0.16152  | -1.21477 |
| T144G | -0.46903 | 0.08866  | 0.26519  |
| T144H | -0.09936 | -0.15694 | -1.15426 |
| T144I | 0.31809  | 0.30581  | 1.5006   |
| T144K | 0.53103  | 0.87953  | -0.50564 |
| T144L | -0.17715 | -0.79146 | 1.01158  |
| T144M | 0.27224  | 0.86811  | 0.30024  |
| T144N | 0.18991  | 0.41691  | 1.50893  |
| T144P | 0.81294  | -0.29767 | 0.1688   |
| T144Q | 0.01133  | 0.23494  | 0.18338  |
| T144R | 0.41201  | 0.34542  | -1.20101 |
| T144S | -0.29724 | -0.48986 | 0.27744  |
| T144T | NA       | NA       | NA       |
| T144V | -0.16605 | -0.19757 | 0.93095  |
| T144W | -0.27348 | 0.52418  | -1.10612 |
| T144Y | 0.00095  | -1.07217 | -1.39652 |
| T144X | 0.05036  | 0.0875   | -0.66145 |
| S145A | -0.27583 | -0.53376 | 1.75795  |
| S145C | 0.12883  | 0.29265  | 1.77847  |
| S145D | 1.77937  | 2.23514  | 2.59516  |
| S145E | 0.92701  | 1.25357  | 2.64525  |
| S145F | 3.08663  | 3.54095  | 1.48375  |
| S145G | 1.32181  | 1.97095  | 1.46748  |

|       |          |          |          |
|-------|----------|----------|----------|
| S145H | 2.84398  | 2.8404   | 1.52425  |
| S145I | 0.20998  | -0.37177 | 1.90069  |
| S145K | 0.5473   | -0.2076  | 1.38551  |
| S145L | 0.36666  | 0.34007  | -0.70637 |
| S145M | 0.31248  | 1.74147  | 1.50835  |
| S145N | 2.10705  | 2.26106  | 1.94491  |
| S145P | -1.22178 | -1.64969 | -1.08816 |
| S145Q | -0.13917 | -0.13122 | 1.48197  |
| S145R | 1.24875  | 1.25563  | 1.0352   |
| S145S | -0.07243 | 0.13573  | 0.08865  |
| S145T | -0.11652 | -0.19148 | 1.29252  |
| S145V | 0.5687   | 0.25581  | 1.90661  |
| S145W | 0.87045  | 0.83392  | 0.92664  |
| S145Y | 4.02102  | 4.6778   | 1.94249  |
| S145X | -0.29883 | -1.49514 | -0.60791 |
| A146A | NA       | NA       | NA       |
| A146C | 0.65904  | 0.62341  | 2.09454  |
| A146D | 0.46015  | -0.18318 | -1.28633 |
| A146E | -0.11152 | -1.30553 | -1.26628 |
| A146F | -0.15542 | 0.07676  | -1.8289  |
| A146G | 0.59744  | 0.94293  | 1.91307  |
| A146H | -0.47255 | -1.48392 | -0.91116 |
| A146I | -0.58426 | 0.15694  | -0.47691 |
| A146K | -0.83838 | -0.72297 | -1.18913 |
| A146L | -0.20467 | 0.19916  | -0.59453 |
| A146M | 0.93138  | 1.03483  | 1.78968  |
| A146N | 0.99093  | 1.9031   | 2.33367  |
| A146P | 3.26983  | 3.15411  | 1.61416  |
| A146Q | -0.03214 | 1.0538   | -0.70154 |
| A146R | -0.28534 | -0.7387  | -0.80654 |
| A146S | 2.82585  | -0.26582 | 1.33093  |
| A146T | 1.47669  | 1.01322  | 2.31588  |
| A146V | 0.49211  | 1.2579   | 1.75975  |
| A146W | 0.56217  | 0.93569  | -1.42074 |
| A146Y | -0.50804 | 1.13049  | -1.16477 |
| A146X | -0.09641 | 0.09873  | -0.85342 |
| K147A | -1.41974 | -1.94486 | 0.63914  |
| K147C | -0.01809 | 0.54046  | 1.04957  |
| K147D | 0.75076  | 0.97257  | 3.4272   |
| K147E | 0.42     | 1.0437   | 2.71186  |
| K147F | 0.08897  | 0.1092   | 1.84665  |
| K147G | 0.30752  | 0.35768  | 2.12827  |
| K147H | 0.05546  | 0.19689  | 2.53412  |

|       |          |          |          |
|-------|----------|----------|----------|
| K147I | -0.13317 | 0.47496  | 0.87172  |
| K147K | NA       | NA       | NA       |
| K147L | -0.3757  | 0.53861  | 0.34302  |
| K147M | 0.52671  | 0.2425   | 0.5806   |
| K147N | 0.4163   | 0.69798  | 1.82921  |
| K147P | -1.83274 | -3.60781 | 2.03207  |
| K147Q | 0.48127  | 0.2706   | 2.10129  |
| K147R | -0.44506 | 0.05737  | 0.7706   |
| K147S | 0.50144  | 0.96975  | 2.57422  |
| K147T | -1.01609 | 0.3058   | 2.48611  |
| K147V | -1.05564 | -0.47632 | 0.47813  |
| K147W | 0.36669  | 0.67005  | 2.3474   |
| K147Y | -0.14077 | 0.25073  | 1.81285  |
| K147X | 0.04017  | -0.01175 | -0.87747 |
| T148A | 0.69752  | -0.63868 | 0.43756  |
| T148C | -0.02435 | 0.27616  | 0.75068  |
| T148D | -0.00949 | 0.04503  | 0.55561  |
| T148E | 0.18216  | 0.6915   | -0.38254 |
| T148F | -0.65241 | -0.78806 | -0.3256  |
| T148G | 0.68644  | 0.55741  | 1.67698  |
| T148H | -0.37058 | 0.08032  | -0.30474 |
| T148I | 0.19965  | -0.66961 | -0.04057 |
| T148K | -0.04796 | -0.94615 | 0.84879  |
| T148L | -0.5454  | -0.05941 | -0.01172 |
| T148M | -0.5952  | 0.71888  | 0.22096  |
| T148N | 0.04168  | 1.24229  | 0.66536  |
| T148P | 2.58029  | 2.14991  | 1.33785  |
| T148Q | 1.42959  | 0.35231  | 0.18586  |
| T148R | 0.37758  | 0.10395  | 0.29566  |
| T148S | -0.22537 | -0.51513 | 0.95184  |
| T148T | NA       | NA       | NA       |
| T148V | -0.45766 | 0.4197   | 0.07455  |
| T148W | 0.02481  | -0.13864 | -1.02787 |
| T148Y | -0.89402 | -0.3809  | -0.74204 |
| T148X | -0.30695 | 0.22292  | -0.56324 |
| R149A | 0.92342  | 1.04667  | 0.16729  |
| R149C | -0.20583 | -0.44226 | 0.94425  |
| R149D | -0.16817 | -0.47965 | -0.10698 |
| R149E | 0.42166  | 0.05533  | 0.50543  |
| R149F | -0.0944  | 0.81206  | 1.57498  |
| R149G | 0.49814  | 0.42495  | 0.44112  |
| R149H | 1.78905  | 1.85644  | 1.11724  |
| R149I | -0.11837 | 0.37108  | 2.22716  |



|       |          |          |          |
|-------|----------|----------|----------|
| R149K | -0.42543 | -0.69814 | -0.19417 |
| R149L | 0.48206  | 0.38525  | 3.0653   |
| R149M | 0.09059  | 0.53388  | 2.04361  |
| R149N | 0.0281   | 0.24948  | 0.66898  |
| R149P | -3.54169 | -1.80761 | -0.8452  |
| R149Q | -0.02991 | 0.42762  | 1.0272   |
| R149R | 0.04689  | 0.36708  | 0.01451  |
| R149S | 0.47133  | -0.28858 | -0.00202 |
| R149T | 1.0956   | 0.2008   | 0.77738  |
| R149V | -0.07639 | 0.72783  | 1.56529  |
| R149W | -0.85991 | -0.13684 | 1.63699  |
| R149Y | 0.20735  | -0.13866 | 2.05126  |
| R149X | 0.37903  | 0.23216  | -0.79053 |
| Q150A | 0.63968  | -0.1677  | 0.25735  |
| Q150C | 0.18187  | -0.05249 | 0.30683  |
| Q150D | -0.29395 | 0.41262  | 0.18093  |
| Q150E | 0.60098  | 0.51452  | 0.66242  |
| Q150F | -0.15911 | 0.44955  | -0.11991 |
| Q150G | 0.32715  | 0.47403  | 0.71323  |
| Q150H | 0.05801  | 0.43893  | 0.24487  |
| Q150I | 0.68306  | -0.08604 | 0.40926  |
| Q150K | 0.28131  | -0.79941 | 0.30841  |
| Q150L | -0.24301 | -0.37446 | 0.16842  |
| Q150M | -0.70623 | -0.28246 | -0.19685 |
| Q150N | -0.39108 | -0.85448 | 0.46769  |
| Q150P | 0.38349  | 0.015    | 1.29345  |
| Q150Q | NA       | NA       | NA       |
| Q150R | -0.27237 | -0.03159 | 0.19955  |
| Q150S | -0.34983 | 0.24337  | -0.10321 |
| Q150T | 0.22813  | 0.46233  | 0.18537  |
| Q150V | 1.03076  | 1.88583  | 0.47815  |
| Q150W | -0.81253 | -0.06723 | 0.01587  |
| Q150Y | 0.04377  | -0.24423 | 0.21151  |
| Q150X | -1.09415 | -1.05064 | -1.03322 |
| G151A | 0.53565  | 0.1459   | -0.31734 |
| G151C | -0.72808 | -0.93821 | -0.68663 |
| G151D | -0.35621 | 1.16419  | 0.92141  |
| G151E | -0.59083 | 0.36678  | 1.02735  |
| G151F | 0.26391  | -0.29145 | -0.40098 |
| G151G | NA       | NA       | NA       |
| G151H | -0.27015 | 0.00327  | -0.09254 |
| G151I | 0.00374  | -0.23922 | 1.55715  |
| G151K | -0.06457 | 0.18043  | -0.50703 |

|       |          |          |          |
|-------|----------|----------|----------|
| G151L | -1.30999 | -0.36521 | 0.30709  |
| G151M | -0.0615  | 0.33493  | -0.05617 |
| G151N | -0.8088  | -0.7098  | 0.05804  |
| G151P | 0.18136  | -0.26084 | 1.5708   |
| G151Q | -0.12763 | 0.77697  | -0.22448 |
| G151R | -0.69057 | 0.16789  | -0.35671 |
| G151S | 0.89833  | 0.7312   | -0.34455 |
| G151T | -0.65235 | -0.36662 | 0.91476  |
| G151V | 0.83475  | 0.47146  | 1.43504  |
| G151W | -1.11053 | -1.07477 | -0.64721 |
| G151Y | -1.30166 | -1.0762  | -0.57854 |
| G151X | -0.00948 | -0.52298 | -0.63466 |
| V152A | -0.04408 | -0.77812 | 1.64946  |
| V152C | 0.42178  | -0.63652 | 0.49757  |
| V152D | 0.42443  | 0.39058  | 1.7093   |
| V152E | 0.58306  | 0.57015  | 1.92967  |
| V152F | 0.77648  | 0.91012  | 1.63271  |
| V152G | 0.37639  | 0.2669   | 1.46851  |
| V152H | 2.92325  | 2.69698  | 1.77956  |
| V152I | -0.75539 | 0.25384  | 1.34672  |
| V152K | 1.65189  | 2.36388  | 0.82211  |
| V152L | 0.32433  | 0.21197  | 0.46782  |
| V152M | 1.90148  | 2.71434  | 0.72404  |
| V152N | 0.82251  | 0.98144  | 1.29969  |
| V152P | -0.18896 | 0.41147  | 1.31209  |
| V152Q | 1.06483  | 1.22585  | 1.08675  |
| V152R | 1.42888  | 1.76984  | 0.28561  |
| V152S | 0.52547  | 0.9391   | 1.13773  |
| V152T | -0.30553 | 0.27333  | 0.93577  |
| V152V | NA       | NA       | NA       |
| V152W | 3.88539  | 5.21221  | 1.33582  |
| V152Y | -0.23932 | 0.2184   | 1.22582  |
| V152X | 0.34822  | 0.06581  | -0.85414 |
| D153A | -1.13146 | -0.1098  | -1.55594 |
| D153C | -3.97125 | -0.58469 | -1.77389 |
| D153D | NA       | NA       | NA       |
| D153E | 1.41923  | 1.50388  | 0.6205   |
| D153F | 0.35056  | 0.22943  | -0.43909 |
| D153G | -0.03558 | 0.18804  | -0.12772 |
| D153H | 0.5716   | 1.09937  | -1.3633  |
| D153I | -0.53472 | 0.24928  | -1.0427  |
| D153K | -0.34177 | 0.44424  | -0.29161 |
| D153L | -0.11225 | 0.20139  | -0.57676 |

|       |          |          |          |
|-------|----------|----------|----------|
| D153M | -0.44562 | -0.43743 | -0.52396 |
| D153N | -0.0187  | 0.91797  | -0.09023 |
| D153P | 0.08527  | 1.07861  | -1.30347 |
| D153Q | 0.43061  | 1.06092  | 0.04808  |
| D153R | -0.36463 | 0.45685  | -0.31093 |
| D153S | -1.70955 | -0.63591 | -0.54509 |
| D153T | -0.38844 | 0.2015   | -0.77439 |
| D153V | -0.61864 | -0.57372 | -1.44701 |
| D153W | -0.42241 | 0.11234  | -0.81435 |
| D153Y | -0.73328 | -0.02136 | -1.21309 |
| D153X | 0.46297  | -0.75404 | -1.03053 |
| D154A | -0.04689 | 0.44858  | -0.46342 |
| D154C | 0.34389  | 0.47375  | -0.2577  |
| D154D | NA       | NA       | NA       |
| D154E | 0.0946   | 0.33283  | 0.1007   |
| D154F | -1.15566 | -1.08748 | -0.07591 |
| D154G | 0.60204  | 0.3844   | -0.19593 |
| D154H | -1.36187 | -0.1063  | -0.5757  |
| D154I | -0.38072 | 0.41519  | -0.19995 |
| D154K | 0.60598  | 1.6197   | -0.76566 |
| D154L | 0.36061  | 0.9917   | -0.38686 |
| D154M | 0.38688  | 1.04053  | -0.57922 |
| D154N | -0.79833 | -0.31496 | -0.43602 |
| D154P | -0.42136 | -0.37424 | 0.15141  |
| D154Q | -0.03364 | 0.74337  | -0.76085 |
| D154R | -0.45964 | -0.80601 | -0.35248 |
| D154S | -0.65568 | -0.86882 | -0.24256 |
| D154T | -0.62274 | -1.64557 | -0.54172 |
| D154V | -0.51255 | -0.06973 | -0.47549 |
| D154W | -0.616   | 0.52331  | -0.10436 |
| D154Y | -0.02318 | 0.20245  | -0.19592 |
| D154X | -0.6429  | -0.95924 | -1.1421  |
| A155A | NA       | NA       | NA       |
| A155C | -0.32296 | -0.10596 | 0.41307  |
| A155D | 0.5273   | 0.7874   | -0.77255 |
| A155E | -0.66365 | 0.08369  | -0.4033  |
| A155F | -0.38731 | -0.34444 | -0.4124  |
| A155G | -0.67054 | -0.35486 | -0.3212  |
| A155H | 0.72469  | 0.46733  | -0.04968 |
| A155I | 0.01475  | -0.02347 | 0.18287  |
| A155K | -0.53496 | -0.58903 | -0.73106 |
| A155L | 0.57034  | 0.21145  | 0.53682  |
| A155M | -0.14607 | 0.69296  | 0.07499  |

|       |          |          |          |
|-------|----------|----------|----------|
| A155N | -0.37244 | -0.1355  | 0.32828  |
| A155P | 0.39613  | 1.3853   | 1.40855  |
| A155Q | 0.61867  | 1.02653  | 0.57169  |
| A155R | -0.12178 | 0.46017  | -0.86877 |
| A155S | 0.04811  | -0.07428 | 0.0763   |
| A155T | 0.199    | -0.41422 | 0.16734  |
| A155V | -0.50167 | 0.05345  | 0.40123  |
| A155W | 1.06161  | 1.47649  | -0.87317 |
| A155Y | 0.63716  | 0.18868  | -0.73869 |
| A155X | 0.47239  | -0.0467  | -1.09859 |
| F156A | 0.92573  | 0.76376  | 2.47137  |
| F156C | 1.20569  | 0.75221  | 2.16279  |
| F156D | 0.34801  | -0.2573  | -0.79546 |
| F156E | 0.71759  | 0.55838  | 1.8723   |
| F156F | NA       | NA       | NA       |
| F156G | 0.3567   | 0.26328  | 1.84893  |
| F156H | 1.36063  | 1.91364  | 1.01494  |
| F156I | -0.48683 | -0.32536 | 0.77292  |
| F156K | 0.24843  | 0.13427  | -0.35429 |
| F156L | 0.84956  | -0.60954 | 2.23628  |
| F156M | 0.15821  | 0.29999  | 1.54191  |
| F156N | 0.48627  | 0.77213  | 1.43749  |
| F156P | 1.6966   | 0.12416  | 1.44126  |
| F156Q | 0.30944  | -0.14541 | 2.08387  |
| F156R | 0.33475  | 0.41928  | -0.72095 |
| F156S | 1.71637  | -0.06792 | 2.83935  |
| F156T | 1.08689  | 0.99396  | 1.6515   |
| F156V | 0.22443  | 0.35648  | 1.01339  |
| F156W | 0.68937  | 1.07039  | 1.2443   |
| F156Y | 0.20596  | 0.17239  | 0.23897  |
| F156X | 0.05656  | -0.07463 | -0.69189 |
| Y157A | -0.28861 | -0.54833 | 0.16004  |
| Y157C | -0.0724  | 0.85662  | -0.08641 |
| Y157D | -0.07002 | -0.0601  | 1.25468  |
| Y157E | 0.26257  | 0.41437  | 1.76509  |
| Y157F | 0.46231  | 0.75737  | -0.12942 |
| Y157G | 0.7437   | -0.2185  | 0.72843  |
| Y157H | 0.0848   | 0.81908  | 0.26709  |
| Y157I | -0.0417  | 0.33763  | 0.24162  |
| Y157K | -0.63692 | 0.29936  | -0.35386 |
| Y157L | 0.45675  | 0.33335  | 0.3626   |
| Y157M | 0.02455  | 0.79524  | -0.15462 |
| Y157N | 0.26962  | -0.18321 | 0.86675  |

|       |          |          |          |
|-------|----------|----------|----------|
| Y157P | 1.04613  | -0.01236 | 0.93274  |
| Y157Q | -0.48088 | -0.31199 | 0.69174  |
| Y157R | 0.97779  | 1.49621  | -0.3095  |
| Y157S | 0.53713  | -0.66201 | 0.57717  |
| Y157T | 0.01669  | -0.27152 | 0.93206  |
| Y157V | 0.99016  | 0.86884  | 0.66033  |
| Y157W | 0.15693  | 0.0334   | 0.28879  |
| Y157Y | NA       | NA       | NA       |
| Y157X | 0.14226  | 0.51823  | -0.97367 |
| T158A | NA       | NA       | NA       |
| T158C | NA       | NA       | NA       |
| T158D | NA       | NA       | NA       |
| T158E | NA       | NA       | NA       |
| T158F | NA       | NA       | NA       |
| T158G | NA       | NA       | NA       |
| T158H | NA       | NA       | NA       |
| T158I | NA       | NA       | NA       |
| T158K | NA       | NA       | NA       |
| T158L | NA       | NA       | NA       |
| T158M | NA       | NA       | NA       |
| T158N | NA       | NA       | NA       |
| T158P | NA       | NA       | NA       |
| T158Q | NA       | NA       | NA       |
| T158R | NA       | NA       | NA       |
| T158S | NA       | NA       | NA       |
| T158T | NA       | NA       | NA       |
| T158V | NA       | NA       | NA       |
| T158W | NA       | NA       | NA       |
| T158Y | NA       | NA       | NA       |
| T158X | NA       | NA       | NA       |
| L159A | -1.32549 | -0.08583 | -0.0063  |
| L159C | 0.5328   | 1.32644  | 0.11385  |
| L159D | 1.27248  | 0.41589  | -0.48327 |
| L159E | 0.1662   | 0.37498  | -0.24729 |
| L159F | 0.4971   | 0.93542  | 0.86809  |
| L159G | 0.54987  | 0.88538  | 0.73341  |
| L159H | -0.10208 | 0.00167  | -0.57392 |
| L159I | -0.16234 | -0.7977  | -0.18739 |
| L159K | 0.1732   | -0.64462 | -0.83646 |
| L159L | -0.6185  | -0.22059 | 0.31799  |
| L159M | 0.31286  | 0.32611  | -0.08234 |
| L159N | -0.83164 | 0.17233  | -0.47265 |
| L159P | -0.37389 | 0.40375  | -0.40958 |

|       |          |          |          |
|-------|----------|----------|----------|
| L159Q | -0.30439 | -0.48935 | -0.44112 |
| L159R | -0.29969 | 0.24179  | -0.76931 |
| L159S | 0.52238  | 1.22653  | 0.34709  |
| L159T | 0.71949  | 0.04577  | -0.08631 |
| L159V | 0.22101  | 0.8031   | 0.24887  |
| L159W | 0.96062  | 0.83876  | 0.9562   |
| L159Y | 1.31171  | 1.28932  | 0.17724  |
| L159X | 0.19592  | -0.18347 | -0.58756 |
| V160A | -0.53779 | -1.01131 | 1.45686  |
| V160C | -0.3636  | 0.31166  | -0.01863 |
| V160D | 0.12935  | 0.0868   | -0.22455 |
| V160E | -0.31668 | -0.07939 | 1.60293  |
| V160F | 0.96814  | 0.94831  | 2.87044  |
| V160G | 0.35647  | -0.09498 | 1.55616  |
| V160H | 0.81945  | 0.22476  | 2.18105  |
| V160I | 2.05895  | 2.24994  | 0.30742  |
| V160K | 0.28183  | -0.19853 | 0.58354  |
| V160L | 0.17083  | 0.3798   | 0.77907  |
| V160M | 0.31735  | 0.09194  | 1.49831  |
| V160N | -0.21505 | -0.30713 | 1.35365  |
| V160P | -0.65124 | 0.42515  | -0.30723 |
| V160Q | 0.64688  | -0.76333 | 1.55549  |
| V160R | 0.45046  | 0.81806  | 1.08199  |
| V160S | -0.19271 | -0.87769 | 0.96014  |
| V160T | -0.62276 | 0.45167  | 0.47522  |
| V160V | NA       | NA       | NA       |
| V160W | -0.21462 | -0.21518 | 1.56085  |
| V160Y | 1.12587  | 1.04615  | 1.77418  |
| V160X | 0.00284  | -0.09838 | -0.78661 |
| R161A | -0.35991 | -0.19747 | 0.49532  |
| R161C | 0.39909  | 0.49226  | 0.93948  |
| R161D | 0.35977  | 0.10644  | 1.24669  |
| R161E | 0.23166  | 0.31237  | 1.98246  |
| R161F | 0.2795   | 1.48781  | 0.88933  |
| R161G | -1.07201 | -0.90631 | 0.87627  |
| R161H | 1.52549  | 0.04853  | 0.7228   |
| R161I | 0.1037   | -1.54941 | 0.91703  |
| R161K | -0.28904 | 0.0986   | 0.30498  |
| R161L | 0.06126  | 1.1204   | 0.66336  |
| R161M | -0.70143 | -0.17419 | 0.37659  |
| R161N | -1.81321 | -0.17034 | 0.44721  |
| R161P | -0.67535 | 0.75139  | 0.85097  |
| R161Q | 0.0027   | 0.27224  | 1.03548  |

|       |          |          |          |
|-------|----------|----------|----------|
| R161R | 1.62023  | 1.92316  | 0.26015  |
| R161S | -1.01436 | 0.1637   | 0.99896  |
| R161T | -0.1658  | 0.4597   | 0.74269  |
| R161V | 0.21471  | -0.50022 | 0.79539  |
| R161W | -0.61158 | -0.92634 | 0.37142  |
| R161Y | 0.15986  | 0.1296   | 0.69262  |
| R161X | 1.48846  | 0.94848  | -0.90866 |
| E162A | -0.03233 | 0.92536  | -0.05483 |
| E162C | -0.4716  | -0.21006 | -0.40234 |
| E162D | 0.2992   | 0.50341  | 0.33835  |
| E162E | NA       | NA       | NA       |
| E162F | 0.26023  | -1.07633 | -0.30238 |
| E162G | 0.26922  | -0.42426 | 0.02104  |
| E162H | -1.13841 | -0.3229  | 0.00712  |
| E162I | 0.49407  | -0.28455 | 0.00947  |
| E162K | 0.53233  | 0.07262  | -0.32931 |
| E162L | 0.12537  | -0.64808 | 0.03943  |
| E162M | 0.03346  | 0.5948   | -0.37439 |
| E162N | -1.31284 | -0.76705 | 0.17552  |
| E162P | -0.26216 | 0.19617  | 0.21548  |
| E162Q | 0.60926  | 0.2468   | -0.34657 |
| E162R | -0.30771 | 0.10326  | -0.44025 |
| E162S | -0.09536 | -0.02085 | -0.08994 |
| E162T | -0.32204 | 0.21782  | -0.42045 |
| E162V | -0.14673 | -0.51481 | 0.38159  |
| E162W | -0.54872 | -0.3946  | -0.50934 |
| E162Y | -1.05065 | -1.19001 | -0.32641 |
| E162X | 0.9875   | 0.25041  | -0.59587 |
| I163A | -0.47187 | -0.04925 | -0.67114 |
| I163C | -1.19689 | -0.68738 | -0.06518 |
| I163D | 0.82241  | 1.56692  | -0.31225 |
| I163E | 0.70944  | 0.58416  | 0.22112  |
| I163F | 0.44407  | -0.80295 | 1.38544  |
| I163G | 0.89535  | 0.25284  | -0.60858 |
| I163H | -0.264   | 0.02794  | 0.85541  |
| I163I | NA       | NA       | NA       |
| I163K | -0.30173 | 0.45916  | -0.16661 |
| I163L | 0.80558  | 0.87346  | 1.384    |
| I163M | -0.198   | 0.19761  | 0.99488  |
| I163N | -0.07998 | -1.16004 | 0.44301  |
| I163P | -1.16986 | -0.52827 | -0.66726 |
| I163Q | 0.36049  | 0.79194  | 0.4456   |
| I163R | 0.05791  | -0.32151 | -0.25924 |

|       |          |          |          |
|-------|----------|----------|----------|
| I163S | -1.00749 | -3.19586 | -1.24543 |
| I163T | -0.81765 | -0.93075 | -0.11932 |
| I163V | 0.02263  | 0.34087  | -0.53866 |
| I163W | 0.04675  | 0.1063   | 1.30656  |
| I163Y | 0.44694  | -0.01406 | 1.35364  |
| I163X | 0.72856  | 0.45618  | -0.71281 |
| R164A | -0.81178 | -1.12054 | 0.21622  |
| R164C | -0.30975 | 0.09987  | 0.25744  |
| R164D | 0.01362  | 0.62022  | 0.3575   |
| R164E | 0.29881  | 0.67117  | 0.17273  |
| R164F | 2.47557  | 2.36754  | 0.67449  |
| R164G | -0.30597 | 0.13534  | 0.49097  |
| R164H | 0.67272  | 0.12925  | 0.14312  |
| R164I | 0.17299  | -0.1663  | 0.24305  |
| R164K | -0.26764 | -0.51716 | -0.2998  |
| R164L | -0.29486 | -1.26652 | 0.06297  |
| R164M | -0.57649 | 0.0402   | 0.17452  |
| R164N | -0.2569  | -0.08851 | 0.22059  |
| R164P | -0.41776 | -0.47998 | -0.24701 |
| R164Q | 0.67142  | 0.49133  | 0.28601  |
| R164R | -0.16936 | 0.29045  | 0.08765  |
| R164S | -0.6163  | -0.43672 | 0.16095  |
| R164T | -0.05851 | 1.2585   | 0.21584  |
| R164V | 0.53331  | -0.32458 | 0.00017  |
| R164W | -0.75586 | 0.33539  | 0.16398  |
| R164Y | -0.67353 | 0.72187  | 0.06756  |
| R164X | 0.33227  | 0.30991  | -0.66757 |
| K165A | 0.25643  | 0.4208   | -0.21333 |
| K165C | -0.67847 | -0.64935 | 0.20783  |
| K165D | -0.4044  | -0.7284  | 0.27565  |
| K165E | 0.53431  | 0.47343  | 0.49585  |
| K165F | -0.27818 | -0.4358  | 0.30229  |
| K165G | -0.03806 | 0.67594  | 0.45975  |
| K165H | -0.93366 | 1.13985  | -0.3389  |
| K165I | 0.04978  | 0.11637  | 0.1863   |
| K165K | NA       | NA       | NA       |
| K165L | 0.91834  | 1.04568  | 0.80906  |
| K165M | 1.62572  | -0.80943 | 0.32265  |
| K165N | 0.13986  | -0.12797 | 0.24794  |
| K165P | -0.07185 | -0.38705 | 0.04172  |
| K165Q | 0.59932  | 0.10185  | 0.18198  |
| K165R | 0.64959  | -1.07557 | 0.22395  |
| K165S | -0.59436 | -0.59021 | 0.25899  |



|       |          |          |          |
|-------|----------|----------|----------|
| K165T | 0.21596  | -0.16323 | 1.23618  |
| K165V | 0.42289  | 0.52976  | 0.50722  |
| K165W | -0.18429 | -0.21465 | -0.1142  |
| K165Y | -0.02669 | 0.09925  | 0.52835  |
| K165X | -0.21785 | -0.38862 | -1.01585 |
| H166A | 0.15322  | -0.29556 | 0.18885  |
| H166C | 0.07169  | 0.31645  | 0.0193   |
| H166D | -0.98058 | -2.22893 | -0.11539 |
| H166E | -1.66881 | -2.61935 | 0.32625  |
| H166F | -0.81406 | -0.96881 | -0.15488 |
| H166G | -1.62131 | 0.65318  | -0.04691 |
| H166H | NA       | NA       | NA       |
| H166I | 0.23931  | -0.85309 | 0.36691  |
| H166K | 0.54342  | 0.26398  | -0.30188 |
| H166L | 0.26659  | -0.10995 | 0.21601  |
| H166M | -0.14647 | 0.71873  | 0.25593  |
| H166N | -0.01291 | -1.18047 | 0.21736  |
| H166P | -0.07323 | 0.84278  | 0.10431  |
| H166Q | 0.50842  | 0.24023  | 0.24309  |
| H166R | -1.78185 | -0.2854  | 0.10881  |
| H166S | -0.64726 | -1.81321 | -0.30141 |
| H166T | -1.68273 | -1.60109 | -0.12969 |
| H166V | -1.22036 | -0.15643 | 0.59878  |
| H166W | -1.14214 | -1.01891 | -0.04271 |
| H166Y | 2.10337  | 2.17538  | 0.94683  |
| H166X | 0.74237  | 0.46419  | -0.47168 |
| K167A | 0.63794  | 0.35477  | 0.53425  |
| K167C | -0.38139 | 0.32808  | 0.79443  |
| K167D | -0.31084 | 0.55448  | 1.3713   |
| K167E | 0.59819  | 0.47658  | 1.35205  |
| K167F | 0.56657  | 0.47641  | 1.44877  |
| K167G | 0.2115   | -0.8548  | 0.35521  |
| K167H | 0.3775   | 1.06787  | 0.26506  |
| K167I | -0.00425 | -1.3608  | 1.05841  |
| K167K | NA       | NA       | NA       |
| K167L | 0.54686  | 0.4194   | 1.44514  |
| K167M | -0.27334 | 1.27178  | 1.36957  |
| K167N | 0.92572  | 1.68191  | 0.9808   |
| K167P | 0.07548  | -0.14492 | 0.17926  |
| K167Q | -0.76801 | -1.19412 | 0.99207  |
| K167R | 1.12294  | 1.24893  | 0.63506  |
| K167S | 0.21407  | 0.38812  | 0.97137  |
| K167T | -0.09386 | 0.30968  | 1.11277  |

|       |          |          |          |
|-------|----------|----------|----------|
| K167V | 0.57192  | 0.40023  | 1.36998  |
| K167W | -0.06212 | -1.68079 | 0.91358  |
| K167Y | 0.57512  | -0.4052  | 1.28308  |
| K167X | 0.32711  | 1.3184   | -0.83817 |
| E168A | 0.78909  | 0.30965  | 0.13525  |
| E168C | -2.26463 | 0.37284  | -0.52061 |
| E168D | 0.70524  | -0.00384 | -0.02642 |
| E168E | NA       | NA       | NA       |
| E168F | -1.69117 | -0.59103 | -0.56121 |
| E168G | -0.73133 | 0.48785  | -0.19392 |
| E168H | 0.21777  | 0.7321   | -0.24328 |
| E168I | 0.89001  | 1.29255  | -0.37221 |
| E168K | -1.48635 | -2.12785 | -0.04212 |
| E168L | 2.04536  | 1.85861  | -0.28554 |
| E168M | -1.10531 | -0.88867 | -0.38581 |
| E168N | -1.22769 | -2.58301 | 0.31719  |
| E168P | -0.24388 | -0.35956 | 0.7521   |
| E168Q | -0.46576 | 0.07421  | -0.09449 |
| E168R | -0.20924 | -0.58851 | 0.06493  |
| E168S | -0.37906 | -0.32209 | 0.09867  |
| E168T | -1.31595 | 0.11534  | -0.3096  |
| E168V | -3.90774 | -0.36329 | -0.47125 |
| E168W | 0.49179  | 1.81207  | 0.1194   |
| E168Y | 0.04242  | -0.40594 | 0.88901  |
| E168X | 0.05455  | 0.53485  | -0.9508  |
| K169A | 2.03072  | 0.41502  | -0.06977 |
| K169C | 0.38685  | -1.71925 | -0.79447 |
| K169D | -0.72741 | -1.00185 | 0.14788  |
| K169E | -1.01842 | -1.0042  | 0.01699  |
| K169F | -0.77127 | -0.06979 | -0.00562 |
| K169G | -1.08313 | -0.93067 | -0.17295 |
| K169H | 0.0971   | -0.36888 | -0.19375 |
| K169I | -0.24647 | -0.639   | -0.23943 |
| K169K | NA       | NA       | NA       |
| K169L | -2.08156 | -0.92661 | -0.21177 |
| K169M | 0.16346  | -0.23313 | 0.25265  |
| K169N | 0.0718   | 0.01229  | 0.09139  |
| K169P | -0.3141  | -1.08001 | -0.16606 |
| K169Q | 1.00042  | 0.44557  | 0.26916  |
| K169R | 0.0287   | -0.17894 | 0.15281  |
| K169S | 0.31248  | -0.32898 | -0.19261 |
| K169T | 0.52617  | -0.8725  | 0.04622  |
| K169V | 0.15095  | -0.17603 | 0.09989  |

|       |          |          |          |
|-------|----------|----------|----------|
| K169W | -0.09932 | 0.10667  | -0.22485 |
| K169Y | -0.51153 | -0.0017  | 0.30185  |
| K169X | -0.20048 | -0.23639 | -0.85544 |
| M170A | -1.04534 | 0.58142  | 0.19668  |
| M170C | -0.03101 | 0.07479  | 0.27526  |
| M170D | -0.47247 | -0.31755 | -0.18225 |
| M170E | -0.1499  | 1.01122  | 0.00355  |
| M170F | 0.29735  | 0.13953  | 0.30172  |
| M170G | -0.50542 | 0.75986  | 0.25309  |
| M170H | -0.86063 | -0.27692 | 0.11382  |
| M170I | 0.31726  | 1.08827  | 0.26046  |
| M170K | 0.11935  | 0.52     | 0.0646   |
| M170L | -0.19005 | 0.57168  | 0.08373  |
| M170M | NA       | NA       | NA       |
| M170N | -0.37353 | -0.40291 | -0.21963 |
| M170P | -0.93465 | -0.41721 | 0.02291  |
| M170Q | 0.42183  | 0.39176  | -0.04643 |
| M170R | -0.0648  | 0.16545  | 0.27248  |
| M170S | 0.41583  | 0.40294  | -0.07283 |
| M170T | -0.43376 | -0.58894 | 0.22618  |
| M170V | 0.1351   | -0.84737 | -0.1831  |
| M170W | -0.86985 | -0.97543 | -0.02204 |
| M170Y | 0.16399  | 0.49898  | -0.01664 |
| M170X | 0.4023   | -0.46819 | -0.8722  |
| S171A | 0.01277  | -0.8497  | -0.53275 |
| S171C | -0.06319 | 0.07783  | 0.55168  |
| S171D | -0.43848 | -0.01193 | -0.24315 |
| S171E | -0.56333 | 0.73087  | -0.05827 |
| S171F | 0.6278   | 0.92621  | -0.24827 |
| S171G | -0.07949 | -0.96914 | -0.12761 |
| S171H | 0.05877  | -0.46273 | -0.2646  |
| S171I | 0.56111  | -0.05579 | -0.18558 |
| S171K | -0.32513 | -0.99601 | -0.82846 |
| S171L | -0.65949 | -1.79262 | 0.28807  |
| S171M | 0.43424  | -0.72086 | 0.02789  |
| S171N | -0.4205  | 0.54611  | 0.04448  |
| S171P | 1.15856  | 1.01052  | 0.35764  |
| S171Q | 0.01556  | 0.91238  | 0.2282   |
| S171R | -0.10168 | -0.20211 | -0.08844 |
| S171S | 0.03187  | 0.43285  | 0.02918  |
| S171T | -0.33076 | 0.93371  | -0.48446 |
| S171V | -0.68865 | -1.01021 | -0.42523 |
| S171W | 0.46194  | 0.18868  | 0.31809  |

|       |          |          |          |
|-------|----------|----------|----------|
| S171Y | -0.08666 | -0.39148 | 0.01123  |
| S171X | 0.08984  | 0.67989  | -0.62659 |
| K172A | -0.9742  | 0.19861  | -0.05538 |
| K172C | -0.02336 | -0.01164 | 0.29037  |
| K172D | 0.45385  | -0.0122  | 0.26035  |
| K172E | -1.01056 | -0.58266 | -0.08085 |
| K172F | 0.04583  | -0.48771 | 0.0986   |
| K172G | -0.25899 | -0.04777 | 0.32042  |
| K172H | 0.96271  | 0.84767  | 0.0387   |
| K172I | 0.36015  | 0.25593  | 0.19521  |
| K172K | NA       | NA       | NA       |
| K172L | 0.01742  | 0.88843  | 0.06125  |
| K172M | 0.46679  | 0.19651  | -0.19482 |
| K172N | 0.79748  | 0.37765  | 0.17901  |
| K172P | 0.68909  | -0.80241 | 0.19068  |
| K172Q | -0.08637 | 0.23173  | 0.06183  |
| K172R | 0.5259   | -0.00619 | 0.03107  |
| K172S | -0.2414  | -0.44815 | 0.06375  |
| K172T | 0.09432  | 0.81642  | -0.07932 |
| K172V | 1.71602  | -0.20304 | 0.02223  |
| K172W | 0.03879  | -0.21943 | -0.01693 |
| K172Y | -0.0023  | -0.6955  | 0.7426   |
| K172X | 0.26393  | 0.4842   | -0.91214 |
| D173A | -0.92014 | -0.73223 | -0.17009 |
| D173C | -0.69698 | -0.11234 | -0.23928 |
| D173D | NA       | NA       | NA       |
| D173E | 0.6541   | 1.04689  | 0.22254  |
| D173F | 0.1192   | -0.4846  | 0.09485  |
| D173G | -0.19509 | 0.32587  | -0.1818  |
| D173H | -0.24219 | -0.66236 | -0.45225 |
| D173I | 0.62459  | 0.57465  | -0.06165 |
| D173K | -0.71215 | 0.76645  | 0.17034  |
| D173L | -0.67648 | -3.09811 | -0.15415 |
| D173M | -0.9435  | -0.44754 | -0.13119 |
| D173N | -0.0665  | 0.40159  | 0.01619  |
| D173P | -0.0671  | 1.01201  | -0.03586 |
| D173Q | 0.16885  | -0.1718  | -0.06788 |
| D173R | -0.94177 | -0.12997 | -0.04378 |
| D173S | -0.41282 | 0.58626  | 0.11845  |
| D173T | -1.1157  | 0.25971  | 0.06632  |
| D173V | -0.20175 | -0.23975 | 0.01276  |
| D173W | 0.08563  | -0.92544 | 0.12017  |
| D173Y | 0.01094  | 0.33802  | -0.02479 |

|       |          |          |          |
|-------|----------|----------|----------|
| D173X | 1.41236  | 1.11768  | -0.7633  |
| G174A | 1.29951  | 0.34973  | 0.48039  |
| G174C | 0.29396  | 0.71295  | 0.52353  |
| G174D | -0.33403 | 0.56504  | 0.31806  |
| G174E | -0.30677 | -0.57993 | 0.20346  |
| G174F | 0.20532  | 0.86428  | -0.41609 |
| G174G | NA       | NA       | NA       |
| G174H | -0.74221 | 0.41383  | -0.43037 |
| G174I | -0.53893 | -0.47624 | 0.10767  |
| G174K | 0.20073  | 0.87066  | 0.1      |
| G174L | -0.39962 | 0.20184  | 0.02065  |
| G174M | 0.17456  | -0.49761 | 0.02445  |
| G174N | -0.45131 | -0.92745 | -0.24612 |
| G174P | 0.41554  | -0.84654 | 0.31578  |
| G174Q | -0.19802 | -0.35628 | 0.364    |
| G174R | -0.37053 | 0.66513  | 0.08476  |
| G174S | 0.84263  | 0.34872  | 0.3205   |
| G174T | 0.18642  | -0.16844 | 0.109    |
| G174V | 0.15953  | 0.18184  | 0.41756  |
| G174W | 0.12624  | 0.71339  | -0.34989 |
| G174Y | -1.17945 | 0.13185  | 0.04724  |
| G174X | 0.50195  | -0.69695 | -1.07674 |
| K175A | -1.49911 | -0.08862 | -0.33763 |
| K175C | 0.0422   | 0.8035   | -0.3106  |
| K175D | 0.44023  | 0.72916  | -0.23577 |
| K175E | 0.00561  | -0.43065 | -0.00334 |
| K175F | 0.40538  | 1.7653   | 0.19197  |
| K175G | -0.81694 | -0.2114  | -0.34517 |
| K175H | 0.28208  | -0.19598 | -0.00711 |
| K175I | -0.09372 | -0.15808 | -0.32689 |
| K175K | NA       | NA       | NA       |
| K175L | 0.14533  | 0.29345  | -0.44856 |
| K175M | 0.28123  | 0.04943  | -0.32487 |
| K175N | -0.23471 | -0.38244 | 0.15666  |
| K175P | -0.13191 | -0.05882 | -0.0332  |
| K175Q | -1.17902 | -0.92738 | -0.28069 |
| K175R | 0.23689  | 0.4274   | -0.04721 |
| K175S | 1.79011  | 1.28077  | 0.25957  |
| K175T | -0.00612 | 0.97418  | -0.08785 |
| K175V | -0.3436  | -0.76933 | -0.30443 |
| K175W | -1.18992 | -0.17662 | 0.0311   |
| K175Y | 0.32343  | 0.10249  | -0.22993 |
| K175X | -0.2003  | -1.13245 | -1.19867 |

|       |          |          |          |
|-------|----------|----------|----------|
| K176A | 0.39192  | -0.421   | 0.10028  |
| K176C | -0.48847 | -0.10285 | 0.10385  |
| K176D | 0.19055  | 0.03632  | -0.03567 |
| K176E | -0.18868 | 0.07686  | -0.32009 |
| K176F | -0.88773 | -0.00382 | 0.46663  |
| K176G | -0.42823 | 0.34636  | -0.03957 |
| K176H | 0.46848  | 0.20701  | -0.81137 |
| K176I | 0.31938  | -0.76118 | -0.10151 |
| K176K | NA       | NA       | NA       |
| K176L | 0.25812  | -0.2789  | -0.40138 |
| K176M | 0.1257   | -0.46326 | -0.08749 |
| K176N | 0.28128  | 0.30762  | 0.1205   |
| K176P | -0.84654 | -0.74743 | -0.16358 |
| K176Q | 0.06629  | -0.15452 | 0.01655  |
| K176R | -0.55594 | -0.0859  | 0.10017  |
| K176S | 0.17982  | -0.01425 | -0.10867 |
| K176T | 0.52488  | -0.006   | -0.11392 |
| K176V | 0.16386  | -0.08822 | 0.22362  |
| K176W | -0.43692 | 0.02717  | 0.07544  |
| K176Y | 0.1233   | -0.08924 | -0.00233 |
| K176X | -0.21546 | 0.01406  | -0.96166 |
| K177A | -0.00818 | 0.13942  | -0.28102 |
| K177C | 0.01928  | 0.25332  | -0.26688 |
| K177D | 0.11921  | 0.69642  | 0.21854  |
| K177E | -0.18557 | 0.41515  | -0.20224 |
| K177F | -0.21156 | -0.88167 | -0.29609 |
| K177G | 0.42721  | 0.75368  | -0.41426 |
| K177H | -0.30311 | -0.10156 | 0.36744  |
| K177I | 0.37928  | 0.5072   | 0.30408  |
| K177K | NA       | NA       | NA       |
| K177L | 0.19763  | 0.46233  | -0.18458 |
| K177M | 0.1538   | -0.13044 | 0.0265   |
| K177N | 0.65786  | 1.08495  | 0.23403  |
| K177P | 0.01533  | -0.68319 | -0.27553 |
| K177Q | -0.78276 | -0.14503 | -0.27936 |
| K177R | 0.12169  | 0.13232  | -0.45424 |
| K177S | 0.03173  | 0.21634  | 0.34761  |
| K177T | -2.54284 | -0.11249 | 0.02466  |
| K177V | 0.70493  | 0.48766  | 0.10968  |
| K177W | -0.35429 | -0.04536 | 0.39711  |
| K177Y | 0.16712  | -0.20024 | -0.15105 |
| K177X | 0.57315  | -0.27609 | -0.97338 |
| K178A | -0.7998  | -0.01192 | 0.10772  |

|       |          |          |          |
|-------|----------|----------|----------|
| K178C | 0.36009  | 1.23967  | 0.27598  |
| K178D | -0.87681 | -0.40859 | 0.01041  |
| K178E | -0.58404 | 0.42777  | -0.39547 |
| K178F | -0.40617 | 1.15053  | -0.16063 |
| K178G | -0.35864 | 0.35631  | -0.11194 |
| K178H | -1.21307 | -1.46723 | -0.49263 |
| K178I | 0.24441  | 0.23586  | 0.11874  |
| K178K | NA       | NA       | NA       |
| K178L | -0.42785 | 0.21516  | -0.95192 |
| K178M | -0.21731 | -0.79572 | -0.38291 |
| K178N | -0.16241 | 0.10466  | 0.05685  |
| K178P | -0.48562 | -0.22906 | 0.05618  |
| K178Q | 0.14017  | 1.05564  | 0.20376  |
| K178R | -0.75993 | 0.08868  | -0.46762 |
| K178S | -0.33215 | 0.34688  | -0.08687 |
| K178T | -0.15856 | -0.05496 | -0.28668 |
| K178V | 0.87253  | -0.21466 | 0.24069  |
| K178W | 0.14228  | -0.14625 | -0.12528 |
| K178Y | 0.85263  | 0.95906  | -0.35781 |
| K178X | 0.44413  | -0.10529 | -1.23155 |
| K179A | 0.15739  | 1.46938  | -0.38925 |
| K179C | -0.43436 | 0.57246  | 0.03245  |
| K179D | -0.10061 | -0.73085 | 0.14933  |
| K179E | -0.98087 | -1.17631 | -0.10863 |
| K179F | -1.42466 | -1.61746 | 0.10102  |
| K179G | 0.8404   | -0.22524 | -0.30392 |
| K179H | -1.21416 | 0.03111  | 0.12606  |
| K179I | 0.25115  | 1.33794  | 0.22098  |
| K179K | NA       | NA       | NA       |
| K179L | -0.22441 | 0.34797  | 0.13425  |
| K179M | 0.5683   | 1.03005  | 0.3977   |
| K179N | 0.50864  | 0.72068  | 0.04564  |
| K179P | 0.41756  | 1.3903   | 0.11589  |
| K179Q | -0.78706 | -1.34543 | 0.35933  |
| K179R | -0.14618 | -0.12862 | 0.60988  |
| K179S | 0.30959  | 0.11355  | 0.18369  |
| K179T | -0.28175 | 0.29309  | -0.14492 |
| K179V | 0.37814  | 0.8049   | 0.34273  |
| K179W | -0.46899 | 0.49036  | 0.03367  |
| K179Y | 0.45798  | 0.76589  | 0.75857  |
| K179X | -0.61159 | 0.08696  | -1.254   |
| K180A | -0.03335 | 0.35454  | -0.23315 |
| K180C | -0.64643 | -0.61391 | -0.05942 |

|       |          |          |          |
|-------|----------|----------|----------|
| K180D | -0.42934 | -0.37024 | -0.07389 |
| K180E | -0.06297 | 1.09419  | 0.00497  |
| K180F | 0.02558  | -0.36019 | -0.22583 |
| K180G | -0.31616 | 0.66961  | 0.01824  |
| K180H | -0.42071 | -0.31344 | -0.10114 |
| K180I | 0.56281  | 0.48575  | 0.22116  |
| K180K | NA       | NA       | NA       |
| K180L | -0.12161 | 0.11122  | 0.15181  |
| K180M | -0.23909 | -0.78691 | 0.13461  |
| K180N | -0.08433 | 0.17693  | 0.32353  |
| K180P | 0.77156  | 1.08315  | 0.03763  |
| K180Q | -0.69593 | -0.5553  | 0.06261  |
| K180R | -0.89127 | -0.6525  | -0.50505 |
| K180S | -0.24364 | -0.50921 | -0.17161 |
| K180T | -0.20591 | 0.71813  | -0.33446 |
| K180V | 0.26576  | 0.00759  | 0.18065  |
| K180W | -0.36343 | -0.77199 | -0.14824 |
| K180Y | -0.55877 | -2.43395 | -0.45495 |
| K180X | 0.31049  | -0.54728 | -0.70809 |
| S181A | 0.03878  | 0.16482  | 0.06414  |
| S181C | 0.82565  | 0.26918  | -0.32189 |
| S181D | -1.06465 | -1.14429 | -0.40002 |
| S181E | -0.52519 | -0.75155 | -0.55652 |
| S181F | 0.19563  | 0.49449  | -0.10292 |
| S181G | -0.70983 | -0.02258 | -0.20084 |
| S181H | 0.0415   | -0.44169 | 0.15059  |
| S181I | -0.028   | 0.55319  | 0.1201   |
| S181K | -0.0054  | 0.5306   | -0.18135 |
| S181L | 0.85306  | 1.77577  | -0.23153 |
| S181M | -0.17242 | 0.94351  | -0.35128 |
| S181N | -0.72808 | -0.03766 | 0.2359   |
| S181P | -1.88652 | 0.16747  | 0.20361  |
| S181Q | 0.37215  | 1.15875  | 0.21623  |
| S181R | -0.33366 | 0.23471  | 0.02188  |
| S181S | -0.32395 | 0.42562  | -0.1846  |
| S181T | -0.37692 | 0.39911  | -0.18814 |
| S181V | -0.16003 | -0.21034 | 0.12498  |
| S181W | 0.13655  | -0.67099 | -0.63608 |
| S181Y | -0.18959 | -1.12575 | -0.18252 |
| S181X | 0.4923   | 0.38082  | -1.1491  |
| K182A | 0.52794  | 0.29427  | 0.05674  |
| K182C | -0.42647 | -0.80973 | -0.66226 |
| K182D | 1.48883  | 0.96889  | 0.1169   |



|       |          |          |          |
|-------|----------|----------|----------|
| K182E | -0.51019 | 0.54546  | 0.16976  |
| K182F | 0.25449  | -0.33028 | -0.13763 |
| K182G | 0.4954   | 0.02941  | -0.10563 |
| K182H | 0.07727  | 0.19974  | -0.0324  |
| K182I | 0.31565  | 0.7083   | -0.0246  |
| K182K | NA       | NA       | NA       |
| K182L | -0.29755 | 0.17619  | 0.08512  |
| K182M | 0.21579  | 0.00962  | -0.15136 |
| K182N | -0.34882 | 0.24943  | 0.09098  |
| K182P | -0.64369 | -0.66894 | 0.01045  |
| K182Q | -0.69882 | -0.11092 | 0.04742  |
| K182R | 0.06042  | 0.41242  | -0.02643 |
| K182S | -1.26971 | -0.31323 | -0.04757 |
| K182T | -0.42081 | -0.6589  | -0.00818 |
| K182V | 0.35908  | 1.18408  | 0.02504  |
| K182W | -0.64166 | -0.56897 | -0.19426 |
| K182Y | -0.56981 | -0.70067 | -0.05001 |
| K182X | 0.41516  | 0.63781  | -0.6782  |
| T183A | 0.05773  | -0.02171 | -0.09708 |
| T183C | 0.33951  | -0.21233 | -0.17787 |
| T183D | -0.31184 | 1.60406  | 0.03803  |
| T183E | -0.25781 | 0.10628  | -0.29173 |
| T183F | -0.42968 | 0.47948  | -0.4815  |
| T183G | -1.00581 | -0.23283 | 0.00693  |
| T183H | 0.57024  | 1.81383  | -0.17252 |
| T183I | 0.0945   | -0.27308 | -0.11413 |
| T183K | 0.13639  | 0.30981  | 0.00467  |
| T183L | 0.92745  | 2.30592  | -0.10048 |
| T183M | 0.92159  | 0.87004  | 0.36349  |
| T183N | -0.08138 | -0.94512 | 0.03215  |
| T183P | -1.37634 | -0.07389 | -0.13547 |
| T183Q | 0.06394  | -0.17073 | 0.03742  |
| T183R | 0.06828  | 0.82557  | -0.05978 |
| T183S | -0.10078 | -0.65462 | -0.21093 |
| T183T | NA       | NA       | NA       |
| T183V | 0.91406  | 0.3932   | -0.02516 |
| T183W | -0.30319 | 0.24594  | -0.48498 |
| T183Y | -0.65733 | -0.21577 | -0.09551 |
| T183X | 0.28384  | 0.31382  | -0.74813 |
| K184A | 0.23149  | 0.162    | 0.18566  |
| K184C | 1.81249  | 1.53876  | -0.34904 |
| K184D | 0.84804  | -0.57621 | 0.07779  |
| K184E | 0.21955  | -0.85576 | 0.03704  |

|       |          |          |          |
|-------|----------|----------|----------|
| K184F | -0.32877 | 0.29243  | 0.00273  |
| K184G | -0.95321 | 0.30707  | 0.10942  |
| K184H | 0.22251  | 0.64843  | 0.19549  |
| K184I | -0.32269 | 0.50757  | 0.14043  |
| K184K | NA       | NA       | NA       |
| K184L | 0.01335  | 0.27074  | -0.05556 |
| K184M | -0.10704 | 0.11235  | 0.24144  |
| K184N | 0.42172  | 0.32169  | 0.39936  |
| K184P | -0.23391 | -0.46929 | 0.03373  |
| K184Q | 0.06383  | -0.16261 | 0.1077   |
| K184R | 0.04066  | 0.2176   | -0.18616 |
| K184S | -0.24438 | -0.84366 | -0.20795 |
| K184T | 0.04858  | 0.24179  | 0.08659  |
| K184V | 0.40836  | 0.78795  | 0.50545  |
| K184W | -0.20376 | -0.79837 | -0.07941 |
| K184Y | 0.47034  | -0.0335  | -0.08688 |
| K184X | 0.93278  | 0.64594  | -0.62498 |
| C185A | 0.70135  | 0.5709   | -0.83972 |
| C185C | NA       | NA       | NA       |
| C185D | -0.59558 | -1.07057 | -0.08626 |
| C185E | 0.3397   | 0.4017   | -0.75481 |
| C185F | 1.35256  | 1.5481   | -0.58869 |
| C185G | 0.73627  | 0.44655  | -0.67872 |
| C185H | 0.3544   | -0.97647 | -0.70691 |
| C185I | 0.31153  | 0.02571  | -0.7825  |
| C185K | -0.11568 | -0.3788  | -0.46357 |
| C185L | 0.78413  | 0.1655   | -0.4808  |
| C185M | 0.04441  | 0.59796  | -0.41509 |
| C185N | -0.11547 | -0.04377 | -0.60895 |
| C185P | -0.4752  | 0.32783  | -0.83886 |
| C185Q | 1.10135  | 0.7051   | -0.96324 |
| C185R | -0.2991  | 0.41314  | -0.63211 |
| C185S | 0.09282  | 0.10436  | -0.71432 |
| C185T | 0.51361  | -0.40722 | -0.50323 |
| C185V | -0.20653 | -0.16447 | -0.63548 |
| C185W | -0.29025 | -0.13363 | -0.32923 |
| C185Y | 0.48597  | -0.40728 | -0.67105 |
| C185X | -0.07158 | 0.47776  | -0.51735 |
| V186A | -0.30572 | -0.72148 | -0.07567 |
| V186C | 0.45091  | 0.09364  | -0.21882 |
| V186D | -0.02592 | -0.37809 | -0.28077 |
| V186E | 0.21536  | -0.17185 | 0.31653  |
| V186F | 0.24753  | -0.76261 | 0.38633  |

|       |          |          |          |
|-------|----------|----------|----------|
| V186G | -0.15628 | -1.39818 | -0.11796 |
| V186H | -0.15892 | -0.10282 | -0.11062 |
| V186I | -0.29511 | -1.10932 | 0.14628  |
| V186K | 0.07958  | 0.07222  | -0.11183 |
| V186L | -0.51184 | 0.99041  | -0.33935 |
| V186M | 0.1471   | 0.90196  | 0.10179  |
| V186N | -0.99289 | 0.46359  | -0.19031 |
| V186P | -0.10573 | -0.09612 | 0.08088  |
| V186Q | -0.4879  | 0.09084  | -0.23872 |
| V186R | -0.84537 | -0.14489 | -0.11874 |
| V186S | 1.49509  | 1.47353  | -0.50333 |
| V186T | -0.33638 | 0.45193  | 0.0975   |
| V186V | NA       | NA       | NA       |
| V186W | -0.49775 | 0.83763  | -0.56544 |
| V186Y | 0.40655  | -0.06795 | -0.10657 |
| V186X | 0.94844  | 0.50162  | -0.12008 |
| I187A | 0.14495  | 0.15321  | 0.02469  |
| I187C | 0.19176  | -0.06317 | -0.16044 |
| I187D | -0.42392 | -0.4506  | -0.85428 |
| I187E | 0.1935   | 0.64009  | -0.60984 |
| I187F | -0.15881 | 0.27255  | -0.36399 |
| I187G | -0.18501 | -0.14094 | -0.70377 |
| I187H | -0.04815 | 0.24367  | -0.36458 |
| I187I | NA       | NA       | NA       |
| I187K | 0.20614  | 0.30493  | -0.77297 |
| I187L | 0.14915  | 0.59544  | 0.49611  |
| I187M | 0.03564  | 0.07982  | 0.07439  |
| I187N | -0.40054 | -1.60451 | 0.14066  |
| I187P | 0.36516  | 0.38662  | 0.00806  |
| I187Q | -0.35584 | 0.25377  | -0.35464 |
| I187R | 0.27212  | 1.11745  | -0.29756 |
| I187S | -0.65368 | -0.22627 | -0.16312 |
| I187T | -0.09923 | 0.65039  | 0.02222  |
| I187V | 0.43093  | -0.06533 | -0.468   |
| I187W | -1.0057  | 0.33967  | -0.13898 |
| I187Y | -0.38499 | -0.4923  | -0.1654  |
| I187X | 0.78365  | 1.70881  | -0.92109 |
| M188A | 1.42629  | 1.55079  | 0.19273  |
| M188C | 0.42088  | 0.42986  | 0.19214  |
| M188D | -0.26046 | -0.3497  | -0.45003 |
| M188E | -0.25864 | -0.24044 | -0.00422 |
| M188F | -0.74085 | 0.21996  | -0.41825 |
| M188G | -0.29332 | -0.49992 | -0.32902 |

|       |          |          |          |
|-------|----------|----------|----------|
| M188H | 0.67763  | -1.19281 | -0.24906 |
| M188I | 1.17631  | -0.13489 | 0.37467  |
| M188K | 0.35787  | 0.0872   | 0.17305  |
| M188L | -1.21674 | 0.12151  | -0.18238 |
| M188M | NA       | NA       | NA       |
| M188N | -0.1548  | -0.15775 | -0.06213 |
| M188P | 0.19446  | -0.54971 | -0.68323 |
| M188Q | 0.05519  | -1.13308 | -0.03288 |
| M188R | 0.48481  | -0.43889 | -0.32835 |
| M188S | 0.30922  | 0.52213  | 0.25231  |
| M188T | 1.38432  | 0.92974  | 0.02883  |
| M188V | -0.01454 | 0.57309  | 0.00079  |
| M188W | -0.55664 | 0.32402  | -0.2426  |
| M188Y | -0.01481 | 0.55333  | -0.31997 |
| M188X | 0.16707  | 0.21145  | -0.36912 |

**Table S3.** Maximum Z-score and number of resistance mutations at each amino acid position

| Residue | Maximum Zscore MRTX1257 | Maximum Zscore Sotorasib | Number of resistant mutations MRTX1257 | Number of resistant mutations Sotorasib |
|---------|-------------------------|--------------------------|----------------------------------------|-----------------------------------------|
| T2      | 1.294723677             | 0.905233059              | 1                                      | 0                                       |
| E3      | 1.378775723             | 0.565090836              | 1                                      | 0                                       |
| Y4      | 2.606531914             | 1.731500312              | 3                                      | 2                                       |
| K5      | 1.00289144              | 0.9072493                | 0                                      | 0                                       |
| L6      | 0.97090953              | 1.171290227              | 0                                      | 0                                       |
| V7      | 1.343973249             | 0.96982655               | 1                                      | 0                                       |
| V8      | 4.515145885             | 5.492160713              | 10                                     | 12                                      |
| V9      | 4.216054787             | 4.562403382              | 8                                      | 6                                       |
| G10     | 1.020652934             | 1.180662778              | 0                                      | 0                                       |
| A11     | 4.904944436             | 2.620531567              | 4                                      | 2                                       |
| C12     | 5.645392764             | 6.352267957              | 16                                     | 16                                      |
| G13     | 5.240096516             | 6.237065461              | 6                                      | 4                                       |
| V14     | 4.952165849             | 4.886813525              | 4                                      | 3                                       |
| G15     | 1.384510886             | 0.352668955              | 1                                      | 0                                       |
| K16     | 5.443122677             | 6.100775535              | 3                                      | 3                                       |
| S17     | 0.672409833             | 0.526047819              | 0                                      | 0                                       |
| A18     | 0.731530656             | 1.043045625              | 0                                      | 0                                       |
| L19     | 2.215486835             | 1.005370096              | 1                                      | 0                                       |
| T20     | 1.216581203             | 3.247190233              | 0                                      | 1                                       |
| I21     | 2.459810797             | 1.245906505              | 1                                      | 0                                       |
| Q22     | 0.815621979             | 0.682374068              | 0                                      | 0                                       |
| L23     | 2.72377033              | 0.753428202              | 2                                      | 0                                       |
| I24     | 1.97876553              | 1.170569503              | 3                                      | 0                                       |
| Q25     | 1.68558115              | 1.787351735              | 1                                      | 1                                       |
| N26     | 0.535583853             | 1.329752084              | 0                                      | 0                                       |
| H27     | 1.92585348              | 0.461704215              | 1                                      | 0                                       |
| F28     | 0.5039588               | 0.44285048               | 0                                      | 0                                       |
| V29     | 0.23924404              | 0.057265763              | 0                                      | 0                                       |
| D30     | 1.648282328             | 1.218159969              | 1                                      | 0                                       |
| E31     | 1.050182409             | 0.324760213              | 0                                      | 0                                       |
| Y32     | 0.311515168             | 0.44677409               | 0                                      | 0                                       |
| D33     | 0.046403201             | 0.649303904              | 0                                      | 0                                       |
| P34     | 0.445445416             | 0.493968537              | 0                                      | 0                                       |
| T35     | 1.661672699             | 1.130699919              | 1                                      | 0                                       |
| I36     | 0.579682921             | 0.436758568              | 0                                      | 0                                       |
| E37     | 2.028880067             | 2.431481664              | 2                                      | 2                                       |

|     |              |             |    |   |
|-----|--------------|-------------|----|---|
| D38 | -0.219606328 | 0.109219756 | 0  | 0 |
| S39 | 0.264535832  | 0.232004114 | 0  | 0 |
| Y40 | 0.645660569  | 0.633562678 | 0  | 0 |
| R41 | 1.570619911  | 1.638768545 | 3  | 1 |
| K42 | 1.749729976  | 0.811171658 | 2  | 0 |
| Q43 | 1.364604672  | 0.736037459 | 1  | 0 |
| V44 | 0.967877691  | 1.61899417  | 0  | 1 |
| V45 | 0.407580738  | 0.471991252 | 0  | 0 |
| I46 | 0.969397222  | 0.836920043 | 0  | 0 |
| D47 | 0.463103306  | 0.436301795 | 0  | 0 |
| G48 | 0.37561348   | 1.06379089  | 0  | 0 |
| E49 | 0.373091803  | 0.63586306  | 0  | 0 |
| T50 | 0.314686782  | 0.900276963 | 0  | 0 |
| C51 | 0.830774084  | 1.541727872 | 0  | 1 |
| L52 | 1.049143402  | 0.615732859 | 0  | 0 |
| L53 | 1.449374898  | 2.417649239 | 3  | 2 |
| D54 | 0.550265979  | 1.006944813 | 0  | 0 |
| I55 | 2.054289983  | 1.318031886 | 1  | 0 |
| L56 | 1.803054277  | 2.85720548  | 1  | 3 |
| D57 | 0.117655301  | 1.107591441 | 0  | 0 |
| T58 | 0.965452768  | 0.383554049 | 0  | 0 |
| A59 | 2.773872135  | 4.577123945 | 3  | 3 |
| G60 | 1.089577556  | 0.800013487 | 0  | 0 |
| Q61 | 4.780400631  | 6.158236851 | 3  | 3 |
| E62 | 2.707686203  | 0.992645974 | 2  | 0 |
| E63 | 2.166134801  | 1.443293674 | 4  | 0 |
| Y64 | 3.603354576  | 0.237455831 | 12 | 0 |
| S65 | NA           | NA          | 0  | 0 |
| A66 | 1.743293017  | 1.284158177 | 2  | 0 |
| M67 | 0.46231462   | 0.79028957  | 0  | 0 |
| R68 | 3.906419214  | 3.941071483 | 13 | 6 |
| D69 | 1.343785293  | 1.505793823 | 1  | 0 |
| Q70 | 2.99881265   | 0.701059313 | 1  | 0 |
| Y71 | 0.514082127  | 0.626352909 | 0  | 0 |
| M72 | 5.295180633  | 1.425614047 | 9  | 0 |
| R73 | 1.607998317  | 1.177954923 | 1  | 0 |
| T74 | 0.733772662  | 1.067788841 | 0  | 0 |
| G75 | 1.259043408  | 0.724833892 | 1  | 0 |
| E76 | 1.504350591  | 1.065044903 | 2  | 0 |
| G77 | 4.194685582  | 4.374040729 | 7  | 6 |
| F78 | 2.007908558  | 0.949033457 | 5  | 0 |
| L79 | 0.640213138  | 0.902417719 | 0  | 0 |
| C80 | 0.975881486  | 0.664804593 | 0  | 0 |
| V81 | 0.713681572  | 1.953615766 | 0  | 1 |
| F82 | 1.247376538  | 1.502288541 | 0  | 0 |

|      |             |             |    |    |
|------|-------------|-------------|----|----|
| A83  | 1.584771783 | 2.518554615 | 1  | 2  |
| I84  | 0.983363425 | 1.575325861 | 0  | 1  |
| N85  | 1.254343714 | 1.196901385 | 1  | 0  |
| N86  | 0.155281742 | 0.870406438 | 0  | 0  |
| T87  | 0.457656706 | 0.870881389 | 0  | 0  |
| K88  | 0.740760556 | 1.428800811 | 0  | 0  |
| S89  | 0.451646257 | 0.71667481  | 0  | 0  |
| F90  | 0.62884367  | 0.953539667 | 0  | 0  |
| E91  | 0.493957554 | 1.108980026 | 0  | 0  |
| D92  | 2.980766421 | 0.726159688 | 6  | 0  |
| I93  | 1.378524018 | 1.313576647 | 1  | 0  |
| H94  | 2.118471117 | 1.111820004 | 1  | 0  |
| H95  | 4.737153117 | 1.446420973 | 19 | 0  |
| Y96  | 3.439876703 | 4.106299126 | 15 | 14 |
| R97  | 2.674616832 | 0.595575846 | 1  | 0  |
| E98  | NA          | NA          | 0  | 0  |
| Q99  | 6.037337873 | 4.352952341 | 11 | 3  |
| I100 | 0.902031783 | 0.835804034 | 0  | 0  |
| K101 | 1.426420579 | 1.061420058 | 1  | 0  |
| R102 | 1.704690625 | 1.321369868 | 8  | 0  |
| V103 | 2.88856742  | 1.453455038 | 4  | 0  |
| K104 | 1.245427576 | 0.557501117 | 0  | 0  |
| D105 | 0.764504708 | 1.132081802 | 0  | 0  |
| S106 | 2.436500411 | 2.742559647 | 1  | 1  |
| E107 | 0.897441209 | 0.656669625 | 0  | 0  |
| D108 | 0.718357451 | 1.043144856 | 0  | 0  |
| V109 | 1.674145014 | 1.246781552 | 1  | 0  |
| P110 | 0.308622245 | 0.820556823 | 0  | 0  |
| M111 | 1.239703153 | 0.979883004 | 0  | 0  |
| V112 | 2.032867738 | 0.669184856 | 2  | 0  |
| L113 | 0.579768001 | 0.834378098 | 0  | 0  |
| V114 | 1.525133454 | 1.837519988 | 1  | 1  |
| G115 | 0.908093717 | 0.689219377 | 0  | 0  |
| N116 | 5.442438422 | 6.357595369 | 6  | 6  |
| K117 | 5.096251082 | 6.958554517 | 10 | 11 |
| C118 | 1.95595303  | 1.709711313 | 1  | 1  |
| D119 | 4.94121766  | 5.680439172 | 5  | 3  |
| L120 | 2.130918786 | 1.286062241 | 1  | 0  |
| P121 | 1.445721304 | 0.622883088 | 1  | 0  |
| S122 | 1.376695868 | 1.53731968  | 1  | 1  |
| R123 | 1.447488703 | 1.474213693 | 1  | 0  |
| T124 | 1.008205096 | 1.189982227 | 0  | 0  |
| V125 | 0.857320078 | 0.557000106 | 0  | 0  |
| D126 | 1.270358172 | 0.958639746 | 1  | 0  |
| T127 | 0.61460264  | 1.507610311 | 0  | 0  |

|      |             |             |   |   |
|------|-------------|-------------|---|---|
| K128 | 2.264038086 | 2.19311207  | 2 | 1 |
| Q129 | 1.009514787 | 1.537569213 | 0 | 1 |
| A130 | 0.487485441 | 0.532158205 | 0 | 0 |
| Q131 | 2.016163492 | 1.838134659 | 1 | 1 |
| D132 | 1.028427329 | 1.543065726 | 0 | 1 |
| L133 | 1.908886943 | 2.168741502 | 1 | 1 |
| A134 | 0.833572184 | 1.401214413 | 0 | 0 |
| R135 | 1.754767628 | 2.354212032 | 1 | 1 |
| S136 | 0.753006607 | 1.085265185 | 0 | 0 |
| Y137 | 0.726262886 | 1.11353737  | 0 | 0 |
| G138 | 1.464454465 | 1.165903166 | 2 | 0 |
| I139 | 1.241736075 | 1.11745158  | 0 | 0 |
| P140 | 0.981999635 | 1.272512033 | 0 | 0 |
| F141 | 1.493127244 | 0.720043225 | 2 | 0 |
| I142 | 2.624562528 | 2.853785198 | 1 | 1 |
| E143 | 1.060659635 | 0.630230773 | 0 | 0 |
| T144 | 0.812936907 | 0.879525784 | 0 | 0 |
| S145 | 4.021020389 | 4.677795988 | 6 | 7 |
| A146 | 3.269827459 | 3.154111607 | 3 | 2 |
| K147 | 0.75076462  | 1.043701648 | 0 | 0 |
| T148 | 2.580292791 | 2.149906273 | 2 | 1 |
| R149 | 1.789049729 | 1.856442052 | 1 | 1 |
| Q150 | 1.030763709 | 1.885831591 | 0 | 1 |
| G151 | 0.898329383 | 1.164194861 | 0 | 0 |
| V152 | 3.885392635 | 5.212214537 | 5 | 5 |
| D153 | 1.419226001 | 1.503880836 | 1 | 0 |
| D154 | 0.605975785 | 1.619697305 | 0 | 1 |
| A155 | 1.061614878 | 1.476490529 | 0 | 0 |
| F156 | 1.716365072 | 1.913638795 | 3 | 1 |
| Y157 | 1.046131039 | 1.496208391 | 0 | 0 |
| T158 | NA          | NA          | 0 | 0 |
| L159 | 1.311710931 | 1.326440871 | 2 | 0 |
| V160 | 2.058949895 | 2.249941904 | 1 | 1 |
| R161 | 1.620234691 | 1.92315781  | 1 | 0 |
| E162 | 0.987504486 | 0.925363412 | 0 | 0 |
| I163 | 0.895345416 | 1.566918209 | 0 | 1 |
| R164 | 2.475570491 | 2.367538352 | 1 | 1 |
| K165 | 1.625724778 | 1.139854014 | 1 | 0 |
| H166 | 2.103370244 | 2.175375132 | 1 | 1 |
| K167 | 1.122944382 | 1.681905935 | 0 | 1 |
| E168 | 2.045356525 | 1.85861207  | 1 | 2 |
| K169 | 2.030717206 | 0.445572633 | 1 | 0 |
| M170 | 0.421826836 | 1.088267379 | 0 | 0 |
| S171 | 1.158564366 | 1.010523441 | 0 | 0 |
| K172 | 1.71602381  | 0.888431637 | 1 | 0 |



|      |             |             |   |   |
|------|-------------|-------------|---|---|
| D173 | 1.412362148 | 1.117681961 | 0 | 0 |
| G174 | 1.299510448 | 0.870655883 | 1 | 0 |
| K175 | 1.790114931 | 1.76529801  | 1 | 1 |
| K176 | 0.524881204 | 0.346359188 | 0 | 0 |
| K177 | 0.704932766 | 1.084947279 | 0 | 0 |
| K178 | 0.872532347 | 1.239672096 | 0 | 0 |
| K179 | 0.840400789 | 1.469381215 | 0 | 0 |
| K180 | 0.771558625 | 1.094194234 | 0 | 0 |
| S181 | 0.853058616 | 1.775771508 | 0 | 1 |
| K182 | 1.488828547 | 1.184075398 | 1 | 0 |
| T183 | 0.927447046 | 2.305922738 | 0 | 3 |
| K184 | 1.812486727 | 1.538759804 | 1 | 1 |
| C185 | 1.352558129 | 1.548101213 | 1 | 1 |
| V186 | 1.495088244 | 1.473534671 | 1 | 0 |
| I187 | 0.783646714 | 1.708807479 | 0 | 0 |
| M188 | 1.426293692 | 1.550786649 | 2 | 1 |

**Table S4.** Alleles selected for validation experiments and their Z-scores in screen data.

| Allele     | Zscore MRTX1257 | Zscore Sotorasib |
|------------|-----------------|------------------|
| C12R       | 5.34            | 6.06             |
| G12C/V8L   | 0.71            | 3.09             |
| G12C/V9F   | 2.63            | 1.00             |
| G12C/G13D  | 3.06            | 4.65             |
| G12C/V14L  | 4.55            | 2.09             |
| G12C/K16T  | 3.42            | 3.65             |
| G12C/A59S  | 2.77            | 4.58             |
| G12C/Q61R  | 4.78            | 6.16             |
| G12C/E62D  | 2.71            | -0.16            |
| G12C/Y64N  | 3.34            | -0.50            |
| G12C/R68S  | 3.76            | 3.47             |
| G12C/M72L  | 2.30            | 0.15             |
| G12C/G77V  | 4.19            | 4.37             |
| G12C/H95D  | 4.74            | -0.44            |
| G12C/H95Q  | 3.29            | 0.51             |
| G12C/H95R  | 2.33            | 0.26             |
| G12C/Y96C  | 1.74            | 1.38             |
| G12C/Y96D  | 3.33            | 3.44             |
| G12C/Q99K  | 1.85            | -0.37            |
| G12C/K117N | 4.32            | 5.89             |
| G12C/D119H | 4.94            | 5.68             |
| G12C/A146P | 3.27            | 3.15             |
| Cutoff     | 1.25            | 1.50             |

The Z-score for each allele in the drug treated arm are listed. The Z-score below cutoff was indicated in grey.

**Table S5.** Summary of IC50 for individual alleles with each G12C inhibitor as measured in Ba/F3 single-allele drug resistance assays.

| Allele     | IC50 ± SD (nM) |                   |
|------------|----------------|-------------------|
|            | Adagrasib      | Sotorasib         |
| G12C       | 1.01 ± 0.18    | 19.81 ± 3.46      |
| G12R       | 598.03 ± 92.92 | 7116.33 ± 1177.58 |
| G12C/V8L   | 4.46 ± 1.21    | 128.62 ± 60.06    |
| G12C/V9F   | 108.7 ± 10.67  | 202 ± 32.35       |
| G12C/G13D  | 44.59 ± 4.93   | 786.5 ± 93.08     |
| G12C/V14L  | 162.93 ± 54.97 | 290.93 ± 65.62    |
| G12C/K16T  | 289.47 ± 73.54 | 2524 ± 479.25     |
| G12C/A59S  | 14.46 ± 3.55   | 766.1 ± 191.67    |
| G12C/Q61R  | 258.67 ± 64.11 | 3998.33 ± 259.72  |
| G12C/E62D  | 115.6 ± 11.43  | 18.57 ± 5.23      |
| G12C/Y64N  | 97.45 ± 46.33  | 9.57 ± 3.46       |
| G12C/R68S  | 147.07 ± 19.03 | 643.27 ± 236.65   |
| G12C/M72L  | 42.02 ± 10.17  | 29.09 ± 8.41      |
| G12C/G77V  | 70.75 ± 29.8   | 699.07 ± 163.14   |
| G12C/H95D  | 234.3 ± 51.8   | 14.43 ± 4.61      |
| G12C/H95Q  | 233.82 ± 67.37 | 17.05 ± 2.71      |
| G12C/H95R  | 213.2 ± 52.26  | 8.6 ± 2.15        |
| G12C/Y96C  | 332.9 ± 39.76  | 3814 ± 577.59     |
| G12C/Y96D  | 376.64 ± 82.57 | 6920.67 ± 2029.04 |
| G12C/Q99K  | 171.43 ± 56.85 | 65.82 ± 6.32      |
| G12C/K117N | 36.98 ± 4.62   | 846.7 ± 51.48     |
| G12C/D119H | 16.26 ± 8.83   | 242.63 ± 154.01   |
| G12C/A146P | 30.66 ± 1.6    | 406.17 ± 61.66    |

**Table S6.** Summary of AUC, AUC change relative to KRAS<sup>G12C</sup> and Relative Resistance Score for each allele. Data are derived from dose-response curves from Ba/F3 single-allele drug resistance assays.

| Allele     | Adagrasib   |                      |                           | Sotorasib    |                      |                           |
|------------|-------------|----------------------|---------------------------|--------------|----------------------|---------------------------|
|            | AUC ± SD    | AUC relative to G12C | Relative resistance score | AUC ± SD     | AUC relative to G12C | Relative resistance score |
| G12C       | 1.1 ± 0.071 | 1.00                 | 0.00                      | 0.3 ± 0.052  | 1.00                 | 0.00                      |
| G12R       | 3.8 ± 0.061 | 3.60                 | 1.00                      | 2.8 ± 0.111  | 8.11                 | 1.00                      |
| G12C/V8L   | 1.6 ± 0.146 | 1.60                 | 0.21                      | 1.1 ± 0.246  | 3.06                 | 0.29                      |
| G12C/V9F   | 3.1 ± 0.032 | 2.90                 | 0.73                      | 1.3 ± 0.035  | 3.81                 | 0.40                      |
| G12C/G13D  | 2.7 ± 0.052 | 2.60                 | 0.59                      | 1.9 ± 0.03   | 5.45                 | 0.63                      |
| G12C/V14L  | 3.2 ± 0.068 | 3.10                 | 0.78                      | 1.5 ± 0.075  | 4.21                 | 0.45                      |
| G12C/K16T  | 3.5 ± 0.068 | 3.40                 | 0.89                      | 2.4 ± 0.103  | 6.93                 | 0.83                      |
| G12C/A59S  | 2.2 ± 0.097 | 2.10                 | 0.41                      | 1.9 ± 0.107  | 5.40                 | 0.62                      |
| G12C/Q61R  | 3.2 ± 0.282 | 3.00                 | 0.78                      | 2.6 ± 0.05   | 7.40                 | 0.90                      |
| G12C/E62D  | 3.1 ± 0.163 | 2.90                 | 0.72                      | 0.3 ± 0.077  | 0.95                 | -0.01                     |
| G12C/Y64N  | 3 ± 0.206   | 2.90                 | 0.71                      | 0.1 ± 0.088  | 0.26                 | -0.10                     |
| G12C/R68S  | 3.2 ± 0.082 | 3.10                 | 0.78                      | 1.8 ± 0.132  | 5.17                 | 0.59                      |
| G12C/M72L  | 2.7 ± 0.072 | 2.60                 | 0.59                      | 0.4 ± 0.114  | 1.31                 | 0.04                      |
| G12C/G77V  | 2.9 ± 0.346 | 2.80                 | 0.69                      | 1.8 ± 0.08   | 5.30                 | 0.60                      |
| G12C/H95D  | 3.4 ± 0.147 | 3.23                 | 0.85                      | 0.2 ± 0.081  | 0.64                 | -0.05                     |
| G12C/H95Q  | 3.4 ± 0.277 | 3.30                 | 0.86                      | 0.3 ± 0.036  | 0.85                 | -0.02                     |
| G12C/H95R  | 3.4 ± 0.11  | 3.22                 | 0.85                      | 0.1 ± 0.033  | 0.31                 | -0.09                     |
| G12C/Y96C  | 3.6 ± 0.042 | 3.40                 | 0.91                      | 2.6 ± 0.018  | 7.41                 | 0.90                      |
| G12C/Y96D  | 3.6 ± 0.079 | 3.50                 | 0.93                      | 2.7 ± 0.113  | 7.85                 | 0.96                      |
| G12C/Q99K  | 3.3 ± 0.16  | 3.10                 | 0.81                      | 0.8 ± 0.036  | 2.32                 | 0.19                      |
| G12C/K117N | 2.6 ± 0.041 | 2.50                 | 0.56                      | 1.95 ± 0.048 | 5.53                 | 0.64                      |
| G12C/D119H | 2.2 ± 0.208 | 2.10                 | 0.41                      | 1.3 ± 0.28   | 3.70                 | 0.38                      |
| G12C/A146P | 2.6 ± 0.046 | 2.40                 | 0.54                      | 1.64 ± 0.057 | 4.64                 | 0.51                      |

## References

1. Starita LM, Fields S. Deep Mutational Scanning: A Highly Parallel Method to Measure the Effects of Mutation on Protein Function. *Cold Spring Harb Protoc* 2015;2015:711-4.
2. Fowler DM, Fields S. Deep mutational scanning: a new style of protein science. *Nat Methods* 2014;11:801-7.
3. Starita LM, Ahituv N, Dunham MJ, et al. Variant Interpretation: Functional Assays to the Rescue. *Am J Hum Genet* 2017;101:315-25.
4. Hallin J, Engstrom LD, Hargis L, et al. The KRAS(G12C) Inhibitor MRTX849 Provides Insight toward Therapeutic Susceptibility of KRAS-Mutant Cancers in Mouse Models and Patients. *Cancer Discov* 2020;10:54-71.
5. Fell JB, Fischer JP, Baer BR, et al. Identification of the Clinical Development Candidate MRTX849, a Covalent KRAS(G12C) Inhibitor for the Treatment of Cancer. *J Med Chem* 2020;63:6679-93.
6. Canon J, Rex K, Saiki AY, et al. The clinical KRAS(G12C) inhibitor AMG 510 drives anti-tumour immunity. *Nature* 2019;575:217-23.
7. Clark TA, Chung JH, Kennedy M, et al. Analytical Validation of a Hybrid Capture-Based Next-Generation Sequencing Clinical Assay for Genomic Profiling of Cell-Free Circulating Tumor DNA. *J Mol Diagn* 2018;20:686-702.
